# Supplementary material for: Practical organic solvent-free Cu(OAc)2/DMAP/TEMPO-catalyzed aldehyde and imine formation from alcohols under air atmosphere
Source: Royal Society of Chemistry journal article supplement (doi:10.1039/c4ra09851j), 2014-01-01

## Practical Organic Solvent-free Cu(OAc)<sub>2</sub>/DMAP/TEMPO-Catalyzed aldehydes and imines formation from alcohols under air atmosphere

Mingyu Guan,<sup>a</sup> Chao Wang,<sup>a</sup> Jingyu Zhang<sup>\*b</sup> and Yingsheng Zhao<sup>\*a</sup>

<sup>a</sup>College of Chemistry, Chemical Engineering and Materials Science, Soochow University, Suzhou 215123, P. R. China.

<sup>b</sup>College of Physics, Optoelectronics and Energy & Collaborative Innovation Center of Suzhou Nano Science and Technology, Soochow University, Suzhou 215006, China.

### *Supplementary Information*

#### **Table of Contents**

|                                                       |     |
|-------------------------------------------------------|-----|
| 1. Reagents.....                                      | S2  |
| 2. Instruments.....                                   | S2  |
| 3. Screening of reaction conditions.....              | S2  |
| 4. Screening of catalysts .....                       | S2  |
| 5. Screening of Ligands .....                         | S3  |
| 6. General procedures for synthesis of aldehydes..... | S4  |
| 7. General procedures for synthesis of imines .....   | S4  |
| 8. Gram scale reaction.....                           | S4  |
| 9. Characterization data of products .....            | S4  |
| 10. References.....                                   | S14 |
| 11. NMR spectra of products .....                     | S15 |

**1. Reagents:** Unless otherwise noted, all reagents were purchased from commercial suppliers and used without further purification. Column chromatography purifications were performed using 300–400 mesh silica gel.

**2. Instruments:** NMR spectra were recorded on Bruker DRX–400 instruments and calibrated using residual solvent peaks as internal reference. Multiplicities are recorded as: s = singlet, d = doublet, t = triplet, dd = doublet of doublets, br = broad singlet, m = multiplet.

### 3. Screening of reaction conditions<sup>a</sup>

**Table S1.** Screening of reaction conditions

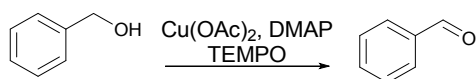

| Entry | Cu(OAc) <sub>2</sub> | DMAP | TEMPO | Atmosphere     | T(°C) | T(h) | Conv. <sup>b</sup> (%) | Yield <sup>c</sup> (%) |
|-------|----------------------|------|-------|----------------|-------|------|------------------------|------------------------|
| 1     | 1%                   | 2%   | 1%    | Open air       | 25    | 24   | 100                    | 97                     |
| 2     | -                    | 2%   | 1%    | Open air       | 25    | 24   | 0                      | 0                      |
| 3     | 1%                   | -    | 1%    | Open air       | 25    | 24   | 20                     | 9                      |
| 4     | 1%                   | 2%   | -     | Open air       | 25    | 24   | 0                      | 0                      |
| 5     | 1%                   | 2%   | -     | Open air       | 80    | 24   | 37                     | 25                     |
| 6     | 1%                   | 2%   | 1%    | O <sub>2</sub> | 25    | 24   | 97                     | 80                     |
| 7     | 1%                   | 2%   | 1%    | Ar             | 25    | 24   | 21                     | 9                      |

<sup>a</sup> Reactions were carried out on a 1mmol scale; <sup>b</sup>, <sup>c</sup>Determined by GC using tridecane as an internal standard.

### 4. Screening of catalysts<sup>a</sup>

**Table S2.** Screening of catalysts

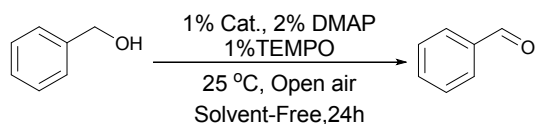

| Entry | Cat.                  | Conv. <sup>b</sup> (%) | Yield <sup>c</sup> (%) |
|-------|-----------------------|------------------------|------------------------|
| 1     | Cu(OAc) <sub>2</sub>  | 100                    | 97                     |
| 2     | Cu(acac) <sub>2</sub> | 75                     | 61                     |

|   |                       |     |    |
|---|-----------------------|-----|----|
| 3 | CuCl <sub>2</sub>     | 100 | 97 |
| 4 | CuBr <sub>2</sub>     | 100 | 95 |
| 5 | CuCl                  | 100 | 96 |
| 6 | CuBr                  | 100 | 96 |
| 7 | CuI                   | 100 | 95 |
| 8 | Fe(acac) <sub>2</sub> | 0   | 0  |
| 9 | FeCl <sub>3</sub>     | 0   | 0  |

<sup>a</sup> Reaction conditions: benzyl alcohol (1 mmol), Catalyst (1 mol%), DMAP (1 mol%), TEMPO (1 mol%), 25 °C, Solvent-free, Open air. <sup>b</sup> <sup>c</sup>Determined by GC using tridecane as an internal standard.

## 5. Screening of Ligands<sup>a</sup>

**Table S3.** Screening of ligands

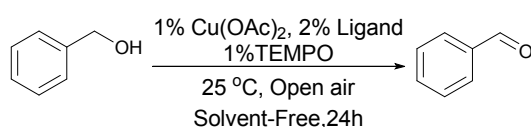

| Entry | Ligand               | Conv. <sup>b</sup> (%) | Yield <sup>c</sup> (%) |
|-------|----------------------|------------------------|------------------------|
| 1     | pyridine             | 64                     | 43                     |
| 2     | 2-methylpyridine     | 66                     | 47                     |
| 3     | 2,6-dimethylpyridine | 70                     | 51                     |
| 5     | 2.2'-Bipyridine      | 45                     | 21                     |
| 6     | 1,10-Phenanthroline  | 98                     | 78                     |
| 7     | DABCO                | 55                     | 36                     |
| 8     | DBU                  | 83                     | 72                     |
| 9     | L-Proline            | 47                     | 35                     |
| 10    | Picolinic acid       | 43                     | 31                     |
| 11    | DMAP                 | 100                    | 97                     |

<sup>a</sup> Reaction conditions: benzyl alcohol (1 mmol), Cu(OAc)<sub>2</sub> (1 mol%), Ligand (1 mol% or 2 mol%), TEMPO (1 mol%), 25 °C, Solvent-free, Open air. <sup>b</sup> <sup>c</sup>Determined by GC using tridecane as an internal standard.

## 6. General procedures for synthesis of aldehydes

A mixture of alcohol (1 mmol, 1.0 eq),  $\text{Cu}(\text{OAc})_2$  (1.8 mg, 0.01 eq), DMAP (2.4 mg, 0.02 eq) and TEMPO (1.5 mg, 0.01 eq) in a 15 mL glass tube (under air atmosphere) was heated at  $x^\circ\text{C}$  for 24 hours. The reaction mixture was cooled to rt, and concentrated in vacuo. The resulting residue was purified by column chromatography on silica gel to give the aldehyde.

## 7. General procedures for synthesis of imines

A mixture of alcohol (1 mmol, 1.0 eq), amine (1.2 mmol, 1.2 eq),  $\text{Cu}(\text{OAc})_2$  (1.8 mg, 0.01 eq), DMAP (2.4 mg, 0.02 eq) and TEMPO (1.5 mg, 0.01 eq) in a 15 mL glass tube (under air atmosphere) was heated at  $110^\circ\text{C}$  for 24 hours. The reaction mixture was cooled to rt, and concentrated in vacuo. The resulting residue was purified by column chromatography on silica gel to give the imine. The silica gel column was leached by eluent (PE :  $\text{Et}_3\text{N}$  = 100:1) at first.

## 8. Mole-scale reaction

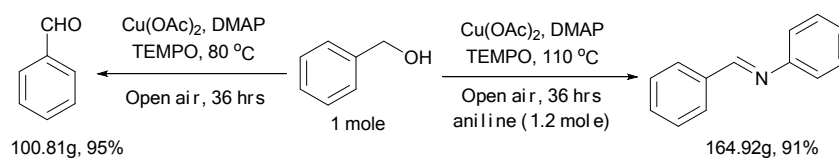

A mixture of benzyl alcohol (1 mol, 108.14g, 1.0 eq),  $\text{Cu}(\text{OAc})_2$  (900 mg, 0.005 eq), DMAP (1200 mg, 0.01 eq) and TEMPO (750 mg, 0.005 eq) in a 250 mL round-bottomed flask (under air atmosphere) was heated at  $80^\circ\text{C}$  for 36 hours. After the reaction was finished, the reaction mixture was extracted with n-pentane ( $5 \times 250$  mL). The combined n-pentane phase was concentrated in vacuo. The yield was determined by GC using tridecane as an internal standard and the residue was purified by vacuum distillation to afford benzaldehyde (87% isolated yield).

A mixture of benzyl alcohol (1 mol, 108.14g, 1.0 eq), aniline (1.2 mol, 111.76g, 1.2 eq),  $\text{Cu}(\text{OAc})_2$  (900 mg, 0.005 eq), DMAP (1200 mg, 0.01 eq) and TEMPO (750 mg, 0.005 eq) in a 500 mL round-bottomed flask (under air atmosphere) was heated at  $110^\circ\text{C}$  with a decantor for 36 hours before it was quenched by  $\text{NH}_4\text{Cl}$  (250 mL, sat. aq.). The layers were separated and the aqueous layer was extracted with EtOAc ( $3 \times 250$  mL). The combined ethyl acetate phase was concentrated in vacuo. The yield was determined by GC using tridecane as an internal standard and the residue was purified by recrystallization (ethyl acetate/ n-pentane, three times) to afford N-benzylideneaniline (80% isolated yield).

## 9. Characterization data of products

### Benzaldehyde(1a)

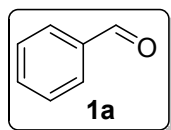

$^1\text{H}$  NMR (400 MHz,  $\text{CDCl}_3$ )  $\delta$  = 10.01 (s, 1H), 7.90 – 7.84 (m, 2H), 7.65 – 7.59 (m, 1H), 7.52 (dd,  $J$  = 7.9, 7.1 Hz, 2H).  $^{13}\text{C}$  NMR (101 MHz,  $\text{CDCl}_3$ )  $\delta$  = 192.49, 136.47, 134.55, 129.82, 129.08. This compound was known.<sup>1</sup>

#### 4-Fluorobenzaldehyde(1b)

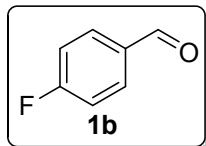

$^1\text{H}$  NMR (400 MHz,  $\text{CDCl}_3$ )  $\delta$  = 9.94 (s, 1H), 7.91 – 7.86 (m, 2H), 7.23 – 7.15 (m, 2H).  $^{13}\text{C}$  NMR (101 MHz,  $\text{CDCl}_3$ )  $\delta$  = 190.65, 167.90, 165.34, 133.07, 133.05, 132.92, 132.83, 132.38, 132.28, 116.55, 116.33, 115.85, 115.64.  $^{19}\text{F}$  NMR (376 MHz,  $\text{CDCl}_3$ )  $\delta$  = -102.36. This compound was known.<sup>1</sup>

#### 2-Chlorobenzaldehyde(1c)

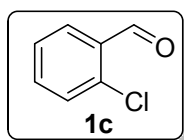

$^1\text{H}$  NMR (400 MHz,  $\text{CDCl}_3$ )  $\delta$  = 10.47 (s, 1H), 7.91 (dd,  $J$  = 7.7, 1.8 Hz, 1H), 7.55 – 7.50 (m, 1H), 7.44 (dd,  $J$  = 8.1, 1.1 Hz, 1H), 7.40 – 7.36 (m, 1H).  $^{13}\text{C}$  NMR (101 MHz,  $\text{CDCl}_3$ )  $\delta$  = 189.96, 138.07, 135.26, 132.56, 130.73, 129.49, 127.41. This compound was known.<sup>1</sup>

#### 4-Chlorobenzaldehyde(1d)

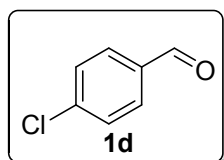

$^1\text{H}$  NMR (400 MHz,  $\text{CDCl}_3$ )  $\delta$  = 9.98 (s, 1H), 7.82 (d,  $J$  = 8.5 Hz, 2H), 7.51 (d,  $J$  = 8.4 Hz, 2H).  $^{13}\text{C}$  NMR (101 MHz,  $\text{CDCl}_3$ )  $\delta$  = 190.98, 141.08, 134.83, 131.03, 129.58. This compound was known.<sup>1</sup>

#### 2-Bromobenzaldehyde(1e)

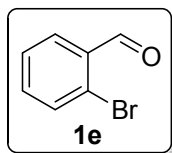

$^1\text{H}$  NMR (400 MHz,  $\text{CDCl}_3$ )  $\delta$  = 10.37 (s, 1H), 7.96 – 7.80 (m, 1H), 7.73 – 7.53 (m, 1H), 7.51 – 7.31 (m, 2H).  $^{13}\text{C}$  NMR (101 MHz,  $\text{CDCl}_3$ )  $\delta$  = 191.83, 135.37, 133.93, 133.54, 129.89, 127.95, 127.14. This compound was known.<sup>2</sup>

#### 4-Bromobenzaldehyde(1f)

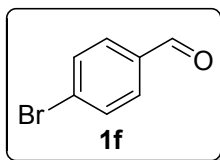

$^1\text{H}$  NMR (400 MHz,  $\text{CDCl}_3$ )  $\delta$  = 9.97 (s, 1H), 7.77 – 7.71 (m, 2H), 7.71 – 7.65 (m, 2H).  $^{13}\text{C}$  NMR (101 MHz,  $\text{CDCl}_3$ )  $\delta$  = 191.20, 135.20, 132.58, 131.10, 129.91. This compound was known.<sup>1</sup>

### 2-Iodobenzaldehyde(1g)

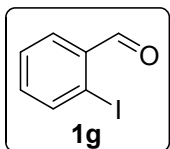

$^1\text{H}$  NMR (400 MHz,  $\text{CDCl}_3$ )  $\delta$  = 10.06 (s, 1H), 7.95 (dd,  $J$  = 7.9, 2.3 Hz, 1H), 7.90 – 7.85 (m, 1H), 7.48 – 7.44 (m, 1H), 7.31 – 7.26 (m, 1H).  $^{13}\text{C}$  NMR (101 MHz,  $\text{CDCl}_3$ )  $\delta$  = 195.86, 140.75, 135.58, 135.22, 130.36, 128.83, 100.82. This compound was known.<sup>3</sup>

### 4-Iodobenzaldehyde(1h)

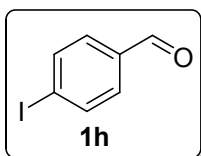

$^1\text{H}$  NMR (400 MHz, DMSO)  $\delta$  = 9.97 (s, 1H), 8.05 – 7.98 (m, 2H), 7.70 – 7.64 (m, 2H).  $^{13}\text{C}$  NMR (101 MHz, DMSO)  $\delta$  = 192.69, 138.13, 135.37, 130.89, 103.56. This compound was known.<sup>4</sup>

### 3-Methoxybenzaldehyde(1i)

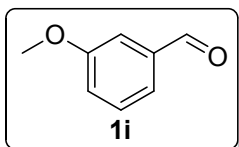

$^1\text{H}$  NMR (400 MHz,  $\text{CDCl}_3$ )  $\delta$  = 9.93 (s, 1H), 7.45 – 7.39 (m, 2H), 7.36 – 7.33 (m, 1H), 7.16 – 7.10 (m, 1H), 3.81 (s, 3H).  $^{13}\text{C}$  NMR (101 MHz,  $\text{CDCl}_3$ )  $\delta$  = 192.15, 160.12, 137.78, 130.03, 123.49, 121.46, 112.07, 55.42. This compound was known.<sup>5</sup>

### 4-Methoxybenzaldehyde(1j)

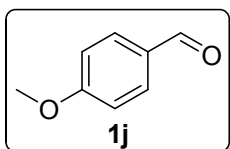

$^1\text{H}$  NMR (400 MHz,  $\text{CDCl}_3$ )  $\delta$  = 9.89 (s, 1H), 7.84 (d,  $J$  = 8.8 Hz, 2H), 7.01 (d,  $J$  = 8.7 Hz, 2H), 3.89 (s, 3H).  $^{13}\text{C}$  NMR (101 MHz,  $\text{CDCl}_3$ )  $\delta$  = 190.91, 164.67, 132.05, 129.99, 114.37, 55.64. This compound was known.<sup>1</sup>

#### 4-tert-Butylbenzaldehyde(1k)

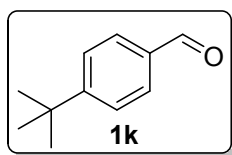

$^1\text{H}$  NMR (400 MHz,  $\text{CDCl}_3$ )  $\delta$  = 9.95 (s, 1H), 7.82 – 7.78 (m, 2H), 7.53 (dd,  $J$  = 8.5, 2.0 Hz, 2H), 1.34 – 1.32 (m, 9H).  $^{13}\text{C}$  NMR (101 MHz,  $\text{CDCl}_3$ )  $\delta$  = 192.04, 158.44, 134.12, 129.72, 126.02, 35.37, 31.09. This compound was known.<sup>6</sup>

#### 2-Nitrobenzaldehyde(1l)

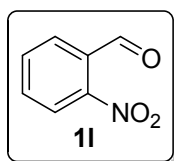

$^1\text{H}$  NMR (400 MHz,  $\text{CDCl}_3$ )  $\delta$  = 10.38 (s, 1H), 8.09 (dd,  $J$ =7.8, 1.4 Hz, 1H), 7.92 (dd,  $J$ =7.4, 1.7 Hz, 1H), 7.82 – 7.73 (m, 2H).  $^{13}\text{C}$  NMR (101 MHz,  $\text{CDCl}_3$ )  $\delta$  = 188.26, 149.62, 134.18, 133.81, 131.39, 129.69, 124.56. This compound was known.<sup>2</sup>

#### 3-Nitrobenzaldehyde(1m)

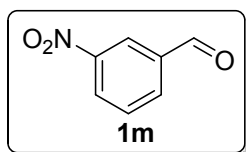

$^1\text{H}$  NMR (400 MHz,  $\text{CDCl}_3$ )  $\delta$  = 10.12 (s, 1H), 8.77 – 8.66 (m, 1H), 8.51 – 8.46 (m, 1H), 8.23 (dt,  $J$ =7.6, 1.3 Hz, 1H), 7.77 (t,  $J$ =7.9 Hz, 1H).  $^{13}\text{C}$  NMR (101 MHz,  $\text{CDCl}_3$ )  $\delta$  = 189.86, 148.90, 137.51, 134.77, 130.52, 128.72, 124.60. This compound was known.<sup>7</sup>

#### 4-Nitrobenzaldehyde(1n)

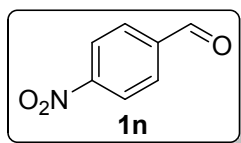

$^1\text{H}$  NMR (400 MHz,  $\text{CDCl}_3$ )  $\delta$  = 10.16 (s, 1H), 8.39 (d,  $J$ =8.6 Hz, 2H), 8.11 – 8.04 (m, 2H).  $^{13}\text{C}$  NMR (101 MHz,  $\text{CDCl}_3$ )  $\delta$  = 190.42, 151.27, 140.18, 130.62, 124.45. This compound was known.<sup>1</sup>

#### 4-Methylbenzaldehyde(1o)

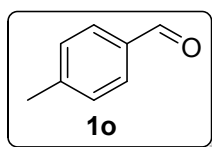

$^1\text{H}$  NMR (400 MHz,  $\text{CDCl}_3$ )  $\delta$  = 9.96 (s, 1H), 7.77 (d,  $J$ =7.9 Hz, 2H), 7.32 (d,  $J$ =7.8 Hz, 2H), 2.43 (s, 3H).  $^{13}\text{C}$  NMR (101 MHz,  $\text{CDCl}_3$ )  $\delta$  = 191.87, 145.42, 134.09, 129.72, 129.59, 21.76. This compound was known.<sup>1</sup>

### 2,6-Difluorobenzaldehyde(2a)

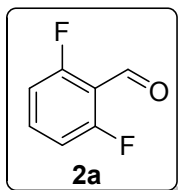

$^1\text{H NMR}$  (400 MHz,  $\text{CDCl}_3$ )  $\delta$  = 10.33 (s, 1H), 7.56 (m, 1H), 6.98 (t,  $J=8.6\text{Hz}$ , 2H).  $^{13}\text{C NMR}$  (101 MHz,  $\text{CDCl}_3$ )  $\delta$  = 184.67, 184.62, 184.58, 164.50, 164.44, 161.88, 161.83, 136.46, 136.34, 136.23, 114.30, 114.19, 114.09, 112.65, 112.60, 112.45, 112.40.  $^{19}\text{F NMR}$  (376 MHz,  $\text{CDCl}_3$ )  $\delta$  = -114.85. This compound was known.<sup>17</sup>

### 2-Chloro-6-fluorobenzaldehyde(2b)

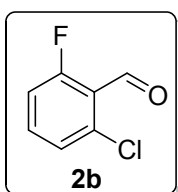

$^1\text{H NMR}$  (400 MHz,  $\text{CDCl}_3$ )  $\delta$  = 10.46 (s, 1H), 7.53 – 7.46 (m, 1H), 7.29 (d,  $J=8.3\text{ Hz}$ , 1H), 7.14 – 7.08 (m, 1H).  $^{13}\text{C NMR}$  (101 MHz,  $\text{CDCl}_3$ )  $\delta$  = 186.79, 186.77, 164.46, 161.83, 136.97, 136.93, 135.30, 135.19, 126.78, 126.74, 121.75, 121.65, 115.74, 115.52.  $^{19}\text{F NMR}$  (376 MHz,  $\text{CDCl}_3$ )  $\delta$  = -114.39. This compound was known.<sup>3</sup>

### 3,4-Dichlorobenzaldehyde(2c)

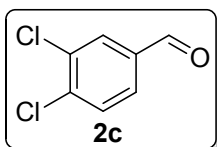

$^1\text{H NMR}$  (400 MHz,  $\text{CDCl}_3$ )  $\delta$  = 9.95 (s, 1H), 7.96 (d,  $J=1.8\text{ Hz}$ , 1H), 7.72 (dd,  $J=8.2, 1.9\text{ Hz}$ , 1H), 7.63 (d,  $J=8.2\text{ Hz}$ , 1H).  $^{13}\text{C NMR}$  (101 MHz,  $\text{CDCl}_3$ )  $\delta$  = 189.81, 139.28, 135.95, 134.12, 131.45, 131.39, 128.53. This compound was known.<sup>8</sup>

### 3,4-Dimethoxy-benzaldehyde(2d)

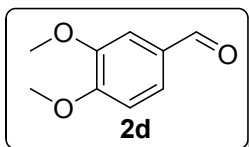

$^1\text{H NMR}$  (400 MHz,  $\text{CDCl}_3$ )  $\delta$  = 9.81 (s, 1H), 7.42 (dd,  $J=8.2, 1.9\text{ Hz}$ , 1H), 7.37 (d,  $J=1.8\text{ Hz}$ , 1H), 6.95 (d,  $J=8.2\text{ Hz}$ , 1H), 3.93 (s, 3H), 3.90 (s, 3H).  $^{13}\text{C NMR}$  (101 MHz,  $\text{CDCl}_3$ )  $\delta$  = 190.96, 154.53, 149.66, 130.17, 126.92, 110.44, 108.98, 56.21, 56.03. This compound was known.<sup>1</sup>

### 5-Bromo-2-methoxybenzaldehyde(2e)



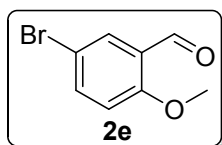

$^1\text{H NMR}$  (400 MHz,  $\text{CDCl}_3$ )  $\delta$  = 10.36 (s, 1H), 7.89 (d,  $J=2.6$  Hz, 1H), 7.61 (dd,  $J=8.9, 2.6$  Hz, 1H), 6.88 (d,  $J=8.9$  Hz, 1H), 3.91 (s, 3H).  $^{13}\text{C NMR}$  (101 MHz,  $\text{CDCl}_3$ )  $\delta$  = 188.45, 160.82, 138.38, 131.03, 126.09, 113.82, 113.49, 56.06. This compound was known.<sup>9</sup>

#### 4-Methylsulphonyl benzaldehyde(2f)

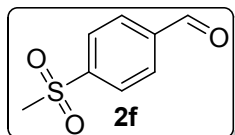

$^1\text{H NMR}$  (400 MHz, DMSO)  $\delta$  = 10.14 (s, 1H), 8.16 (s, 4H), 3.30 (s, 3H).  $^{13}\text{C NMR}$  (101 MHz,  $\text{CDCl}_3$ )  $\delta$  = 192.55, 145.31, 139.29, 130.23, 127.77, 43.15. This compound was known.<sup>10</sup>

#### 3-Phenoxy-benzaldehyde(2g)

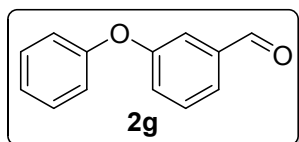

$^1\text{H NMR}$  (400 MHz,  $\text{CDCl}_3$ )  $\delta$  = 9.95 (s, 1H), 7.60 (d,  $J=7.5$  Hz, 1H), 7.52 – 7.45 (m, 2H), 7.38 (t,  $J=7.9$  Hz, 2H), 7.31 – 7.26 (m, 1H), 7.17 (t,  $J=7.4$  Hz, 1H), 7.05 (dd,  $J=8.6, 0.9$  Hz, 2H).  $^{13}\text{C NMR}$  (101 MHz,  $\text{CDCl}_3$ )  $\delta$  = 191.65, 158.43, 156.25, 138.12, 130.49, 130.10, 124.75, 124.61, 124.24, 119.53, 118.16. This compound was known.<sup>11</sup>

#### 1-Naphthalenecarboxaldehyde(2h)

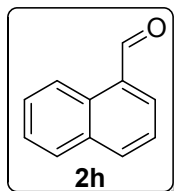

$^1\text{H NMR}$  (400 MHz,  $\text{CDCl}_3$ )  $\delta$  = 10.38 (s, 1H), 9.26 (d,  $J=8.6$  Hz, 1H), 8.07 (d,  $J=8.2$  Hz, 1H), 7.95 (dd,  $J=7.1, 1.3$  Hz, 1H), 7.90 (d,  $J=7.9$  Hz, 1H), 7.71 – 7.66 (m, 1H), 7.63 – 7.55 (m, 2H).  $^{13}\text{C NMR}$  (101 MHz,  $\text{CDCl}_3$ )  $\delta$  = 193.61, 136.73, 135.32, 133.74, 131.40, 130.54, 129.09, 128.52, 126.99, 124.90. This compound was known.<sup>1</sup>

#### 3-Phenyl-2-propenal(2i)

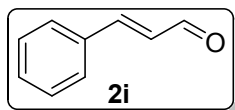

$^1\text{H NMR}$  (400 MHz,  $\text{CDCl}_3$ )  $\delta$  = 9.69 (d,  $J=7.7$  Hz, 1H), 7.56 (d,  $J=1.8$  Hz, 1H), 7.54 (s, 1H), 7.49 – 7.38 (m, 4H), 6.70 (dd,  $J=16.0, 7.7$  Hz, 1H).  $^{13}\text{C NMR}$  (101 MHz,  $\text{CDCl}_3$ )  $\delta$  = 193.68, 152.77, 133.98, 131.26, 129.09, 128.55, 128.49. This compound was known.<sup>1</sup>

### 2-Thiophenecarboxaldehyde(2j)

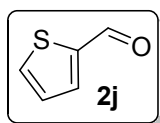

$^1\text{H}$  NMR (400 MHz,  $\text{CDCl}_3$ )  $\delta$  = 9.92 (s, 1H), 7.79 – 7.73 (m, 2H), 7.22 – 7.17 (dd,  $J=4.9, 3.8$  Hz, 1H).

$^{13}\text{C}$  NMR (101 MHz,  $\text{CDCl}_3$ )  $\delta$  = 183.12, 144.05, 136.48, 135.23, 128.41. This compound was known.<sup>1</sup>

### 2-Furancarboxaldehyde(2k)

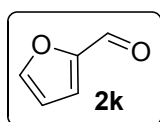

$^1\text{H}$  NMR (400 MHz,  $\text{CDCl}_3$ )  $\delta$  = 9.67 (s, 1H), 7.71 (s, 1H), 7.30 – 7.25 (m, 1H), 6.65 – 6.57 (m, 1H).

$^{13}\text{C}$  NMR (101 MHz,  $\text{CDCl}_3$ )  $\delta$  = 177.99, 153.04, 148.20, 121.20, 112.69 This compound was known.<sup>1</sup>

### 4-(Methylthio)benzaldehyde(3a)

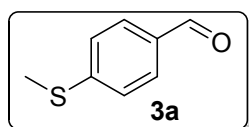

$^1\text{H}$  NMR (400 MHz,  $\text{CDCl}_3$ )  $\delta$  = 9.90 (s, 1H), 7.80 – 7.71 (m, 2H), 7.35 – 7.26 (m, 2H), 2.52 (s, 3H).

$^{13}\text{C}$  NMR (101 MHz,  $\text{CDCl}_3$ )  $\delta$  = 191.20, 147.90, 132.90, 129.95, 125.14, 14.63. This compound was known.<sup>12</sup>

### 4-Hydroxybenzaldehyde(3b)

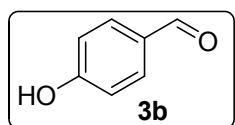

$^1\text{H}$  NMR (400 MHz,  $\text{CDCl}_3$ )  $\delta$  = 9.83 (s, 1H), 7.89 – 7.75 (m, 2H), 7.47 (s, 1H), 7.07 – 6.92 (m, 2H).

$^{13}\text{C}$  NMR (101 MHz,  $\text{CDCl}_3$ )  $\delta$  = 192.04, 162.52, 132.90, 129.50, 116.30. This compound was known.<sup>13</sup>

### 3-Hydroxybenzaldehyde(3c)

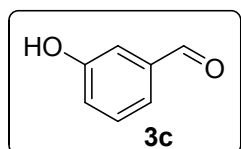

$^1\text{H}$  NMR (400 MHz,  $\text{CDCl}_3$ )  $\delta$  = 9.92 (s, 1H), 7.51 – 7.34 (m, 3H), 7.19 (d,  $J=7.0$  Hz, 1H), 7.03 (s, 1H).

$^{13}\text{C}$  NMR (101 MHz,  $\text{CDCl}_3$ )  $\delta$  = 193.48, 156.85, 137.67, 130.56, 123.70, 122.66, 115.02. This compound was known.<sup>13</sup>

#### 4-Hydroxy-3-methoxybenzaldehyde(3d)

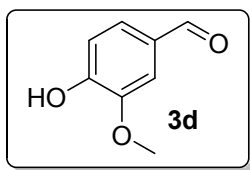

$^1\text{H NMR}$  (400 MHz,  $\text{CDCl}_3$ )  $\delta$  = 9.82 (s, 1H), 7.44 – 7.40 (m, 2H), 7.06 – 7.02 (m, 1H), 6.26 (s, 1H), 3.96 (s, 3H).  $^{13}\text{C NMR}$  (101 MHz,  $\text{CDCl}_3$ )  $\delta$  = 191.05, 151.82, 147.28, 130.02, 127.69, 114.52, 108.90, 56.26. This compound was known.<sup>14</sup>

#### 2-Aminobenzaldehyde(3e)

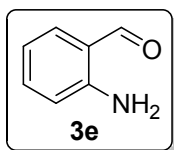

$^1\text{H NMR}$  (400 MHz,  $\text{CDCl}_3$ )  $\delta$  = 9.84 (s, 1H), 7.45 (d,  $J=7.8$  Hz, 1H), 7.32 – 7.24 (m, 1H), 6.72 (t,  $J=7.4$  Hz, 1H), 6.63 (d,  $J=8.3$  Hz, 1H), 6.15 (s, 2H).  $^{13}\text{C NMR}$  (101 MHz,  $\text{CDCl}_3$ )  $\delta$  = 194.05, 149.91, 135.68, 135.16, 118.74, 116.27, 116.00. This compound was known.<sup>3</sup>

#### 3,7-Dimethyl-2,6-octadienal(3f)

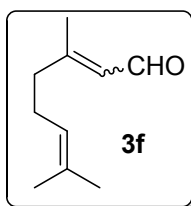

$^1\text{H NMR}$  (400 MHz,  $\text{CDCl}_3$ )  $\delta$  = 9.97 – 9.79 (m, 1H), 5.81 (dd,  $J=6.9, 1.1$  Hz, 1H), 5.08 – 4.98 (m, 1H), 2.53 (td,  $J=7.5, 1.5$  Hz, 1H), 2.16 (d,  $J=5.8$  Hz, 3H), 2.11 (d,  $J=2.1$  Hz, 2H), 1.92 (dd,  $J=2.2, 1.3$  Hz, 1H), 1.62 (s, 3H), 1.54 (d,  $J=6.5$  Hz, 3H).  $^{13}\text{C NMR}$  (101 MHz,  $\text{CDCl}_3$ )  $\delta$  = 191.19, 190.67, 163.74, 133.60, 132.82, 128.62, 127.38, 122.58, 122.28, 40.57, 32.53, 27.01, 25.71, 25.60, 25.01, 17.67, 17.52. This compound was known.<sup>15</sup>

#### 4'-Bromoacetophenone(3g)

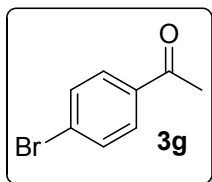

$^1\text{H NMR}$  (400 MHz,  $\text{CDCl}_3$ )  $\delta$  = 7.77 (d,  $J=8.6$  Hz, 2H), 7.56 (d,  $J=8.7$  Hz, 2H), 2.54 (s, 3H).  $^{13}\text{C NMR}$  (101 MHz,  $\text{CDCl}_3$ )  $\delta$  = 196.99, 135.83, 131.89, 129.86, 128.30, 26.56. This compound was known.<sup>1</sup>

#### Diphenylmethanone(3h)

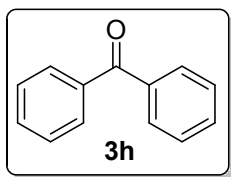

$^1\text{H}$  NMR (400 MHz,  $\text{CDCl}_3$ )  $\delta$  = 7.81 (d,  $J=7.9$  Hz, 4H), 7.60 (dd,  $J=10.9, 3.8$  Hz, 2H), 7.48 (t,  $J=7.6$  Hz, 4H).  $^{13}\text{C}$  NMR (101 MHz,  $\text{CDCl}_3$ )  $\delta$  = 196.88, 137.72, 132.54, 130.18, 128.40. This compound was known.<sup>1</sup>

#### N-Benzylideneaniline (4a)

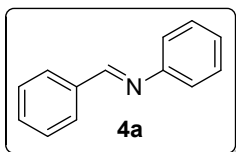

$^1\text{H}$  NMR (400 MHz,  $\text{CDCl}_3$ )  $\delta$  = 8.45 (s, 1H), 7.91 (dd,  $J=6.5, 3.1$  Hz, 2H), 7.51 – 7.44 (m, 3H), 7.40 (dd,  $J=10.6, 4.9$  Hz, 2H), 7.27 – 7.17 (m, 3H).  $^{13}\text{C}$  NMR (101 MHz,  $\text{CDCl}_3$ )  $\delta$  = 160.56, 152.20, 136.33, 131.51, 129.28, 128.94, 128.90, 126.07, 120.99. This compound was known.<sup>5</sup>

#### N-(4-methoxybenzylidene)aniline (4b)

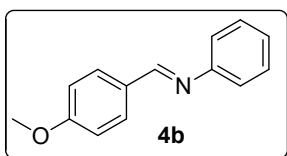

$^1\text{H}$  NMR (400 MHz,  $\text{CDCl}_3$ )  $\delta$  = 8.37 (s, 1H), 7.84 (d,  $J=8.7$  Hz, 2H), 7.37 (t,  $J=7.7$  Hz, 2H), 7.21 (d,  $J=8.2$  Hz, 2H), 7.18 (s, 1H), 3.85 (s, 3H).  $^{13}\text{C}$  NMR (101 MHz,  $\text{CDCl}_3$ )  $\delta$  = 162.36, 159.82, 152.48, 130.62, 129.38, 129.22, 125.67, 120.99, 114.30, 55.53. This compound was known.<sup>5</sup>

#### N-(naphthalen-1-ylmethylene)aniline(4c)

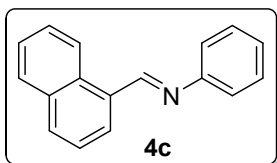

$^1\text{H}$  NMR (400 MHz,  $\text{CDCl}_3$ )  $\delta$  = 9.08 (s, 1H), 9.04 (d,  $J=8.5$  Hz, 1H), 8.08 (d,  $J=7.1$  Hz, 1H), 7.95 (d,  $J=8.2$  Hz, 1H), 7.90 (d,  $J=8.1$  Hz, 1H), 7.64 – 7.58 (m, 1H), 7.58 – 7.51 (m, 2H), 7.43 (t,  $J=7.8$  Hz, 2H), 7.27 (dd,  $J=16.2, 7.8$  Hz, 3H).  $^{13}\text{C}$  NMR (101 MHz,  $\text{CDCl}_3$ )  $\delta$  = 160.20, 152.79, 134.02, 132.05, 131.61, 131.57, 129.96, 129.33, 128.88, 127.59, 126.34, 126.05, 125.42, 124.35, 121.06. This compound was known.<sup>5</sup>

#### N-(Thiophen-2-ylmethylene)aniline(4d)

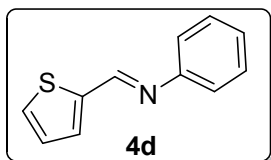

$^1\text{H}$  NMR (400 MHz,  $\text{CDCl}_3$ )  $\delta$  = 8.48 (s, 1H), 7.43 – 7.39 (m, 2H), 7.36 – 7.30 (m, 2H), 7.20 – 7.15 (m, 3H), 7.05 (dd,  $J$ =5.0, 3.7 Hz, 1H).  $^{13}\text{C}$  NMR (101 MHz,  $\text{CDCl}_3$ )  $\delta$  = 152.97, 151.36, 142.79, 132.27, 130.28, 129.12, 127.74, 126.02, 120.99. This compound was known.<sup>5</sup>

#### **N-benzylidenecyclohexanamine (4e)**

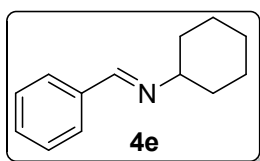

$^1\text{H}$  NMR (400 MHz,  $\text{CDCl}_3$ )  $\delta$  = 8.32 (s, 1H), 7.77 – 7.69 (m, 2H), 7.43 – 7.35 (m, 3H), 3.25 – 3.15 (m, 1H), 1.88 – 1.80 (m, 2H), 1.79 – 1.54 (m, 5H), 1.44 – 1.21 (m, 3H).  $^{13}\text{C}$  NMR (101 MHz,  $\text{CDCl}_3$ )  $\delta$  = 158.72, 136.74, 130.43, 128.63, 128.17, 70.13, 34.49, 25.77, 24.94. This compound was known.<sup>5</sup>

#### **N-benzylidenehexan-1-amine (4f)**

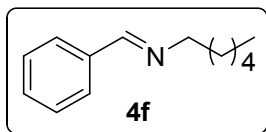

$^1\text{H}$  NMR (400 MHz,  $\text{CDCl}_3$ )  $\delta$  = 8.27 (s, 1H), 7.79 – 7.67 (m, 2H), 7.47 – 7.35 (m, 3H), 3.61 (dd,  $J$ =7.0, 6.3 Hz, 2H), 1.74 – 1.66 (m, 2H), 1.39 – 1.30 (m, 6H), 0.90 (t,  $J$ =6.8 Hz, 3H).  $^{13}\text{C}$  NMR (101 MHz,  $\text{CDCl}_3$ )  $\delta$  = 160.81, 136.49, 130.53, 128.67, 128.12, 61.94, 31.79, 31.01, 27.16, 22.74, 14.19. This compound was known.<sup>16</sup>

#### **N-benzylidene-2-phenylethanamine (4g)**

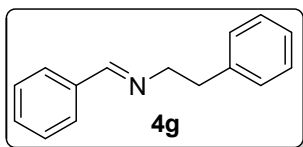

$^1\text{H}$  NMR (400 MHz,  $\text{CDCl}_3$ )  $\delta$  = 8.17 (s, 1H), 7.71 (dd,  $J$ =6.2, 3.3 Hz, 2H), 7.41 (dd,  $J$ =4.4, 2.5 Hz, 3H), 7.31 – 7.18 (m, 5H), 3.87 (t,  $J$ =7.5 Hz, 2H), 3.02 (t,  $J$ =7.5 Hz, 2H).  $^{13}\text{C}$  NMR (101 MHz,  $\text{CDCl}_3$ )  $\delta$  = 161.61, 139.99, 136.24, 130.67, 129.11, 128.66, 128.42, 128.14, 126.19, 63.25, 37.60. This compound was known.<sup>5</sup>

## 10. References

- 1 G. F. Zhang, X. W. Han, Y. X. Luan, Y. Wang, X. Wen and C. R. Ding, *Chem. Commun.*, 2013, **49**, 7908.
- 2 X. L. Liu, Q. Q. Xia, Y. J. Zhang, C. Y. Chen and W. Z. Chen, *J. Org. Chem.*, 2013, **78**, 8531.
- 3 J. M. Hoover and S. S. Stahl, *J. Am. Chem. Soc.*, 2011, **133**, 16901.
- 4 S. E. Gibson, N. Mainolfi, S. B. Kalindjian, P. T. Wright and A. J. P. White, *Chem. Eur. J.*, 2005, **11**, 69.
- 5 L. Tang, H. Y. Sun, Y. F. Li, Z. G. Zha and Z. Y. Wang, *Green Chem.*, 2012, **14**, 3423.
- 6 K. Lee and R. E. Maleczka, *Org. Lett.*, 2006, **8**, 1887.
- 7 Y. Kuang, Y. Nabaee, T. Hayakawa and M. Kakimoto, *Green Chem.*, 2011, **13**, 1659.
- 8 M. Hajimohammadi, N. Safari, H. Mofakham and F. Deyhimi, *Green Chem.*, 2011, **13**, 991.
- 9 K. Ohsawa, M. Yoshida and T. Doi, *J. Org. Chem.*, 2013, **78**, 3438.
- 10 R. D. Chakravarthy, V. Ramkumar and D. K. Chand, *Green Chem.*, 2014, **16**, 2190.
- 11 N. Jalalian, E. E. Ishikawa, L. F. Silva and B. Olofsson, *Org. Lett.*, 2011, **13**, 1552.
- 12 Y. G. Zhu, B. G. Zhao and Y. Shi, *Org. Lett.*, 2013, **15**, 992.
- 13 H. Tsunoyama, H. Sakurai, Y. Negishi and T. Tsukuda, *J. Am. Chem. Soc.*, 2005, **127**, 9374.
- 14 T. Petchmanee, P. Ploypradith and S. Ruchirawat, *J. Org. Chem.*, 2006, **71**, 2892.
- 15 S. Kobayashi, H. Miyamura, R. Akiyama and T. Ishida, *J. Am. Chem. Soc.*, 2005, **127**, 9251.
- 16 J. F. Soule, H. Miyamura and S. Kobayashi, *Chem. Commun.*, 2013, **49**, 355.
- 17 H. Sun and S. G. DiMagno, *Angew. Chem., Int. Ed.*, 2006, **45**, 2720.

## 11. NMR Spectra of products

### Benzaldehyde(1a)

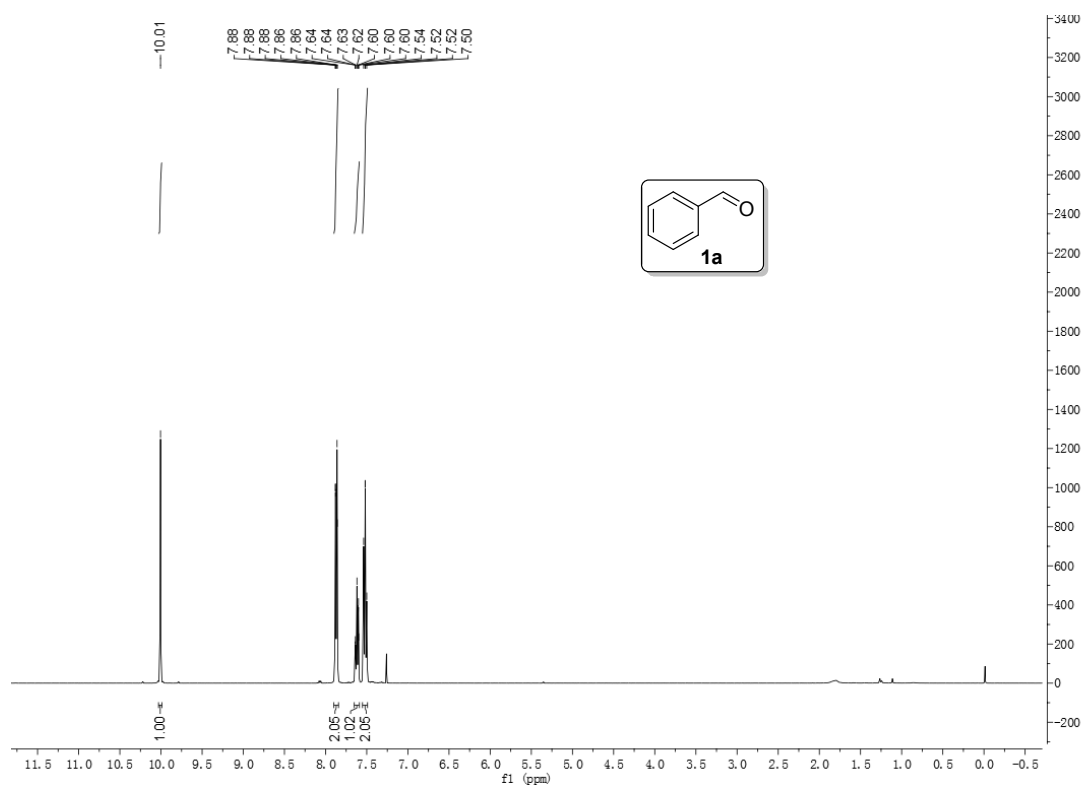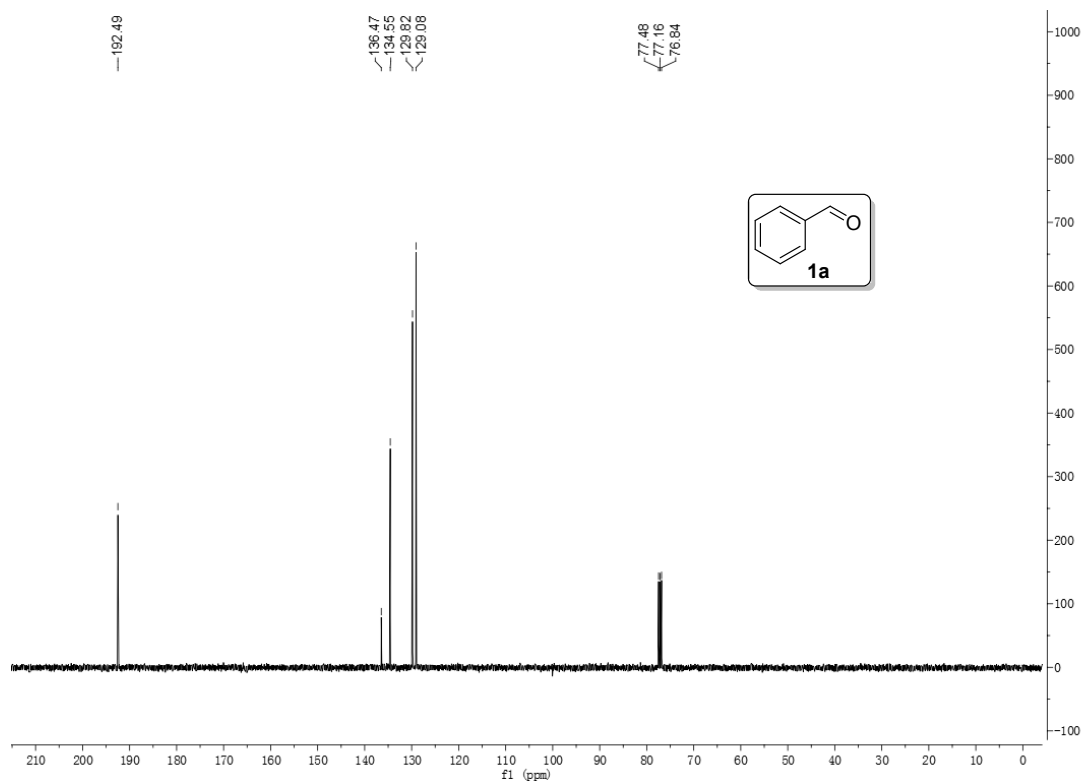

# 4-Fluorobenzaldehyde(1b)

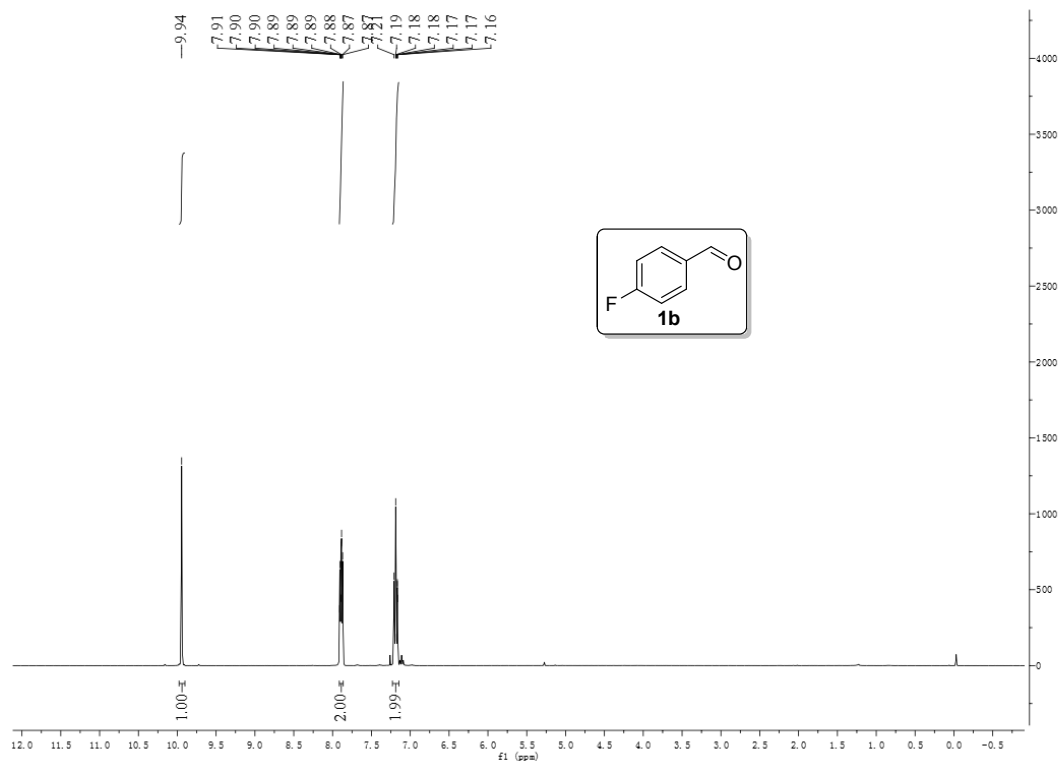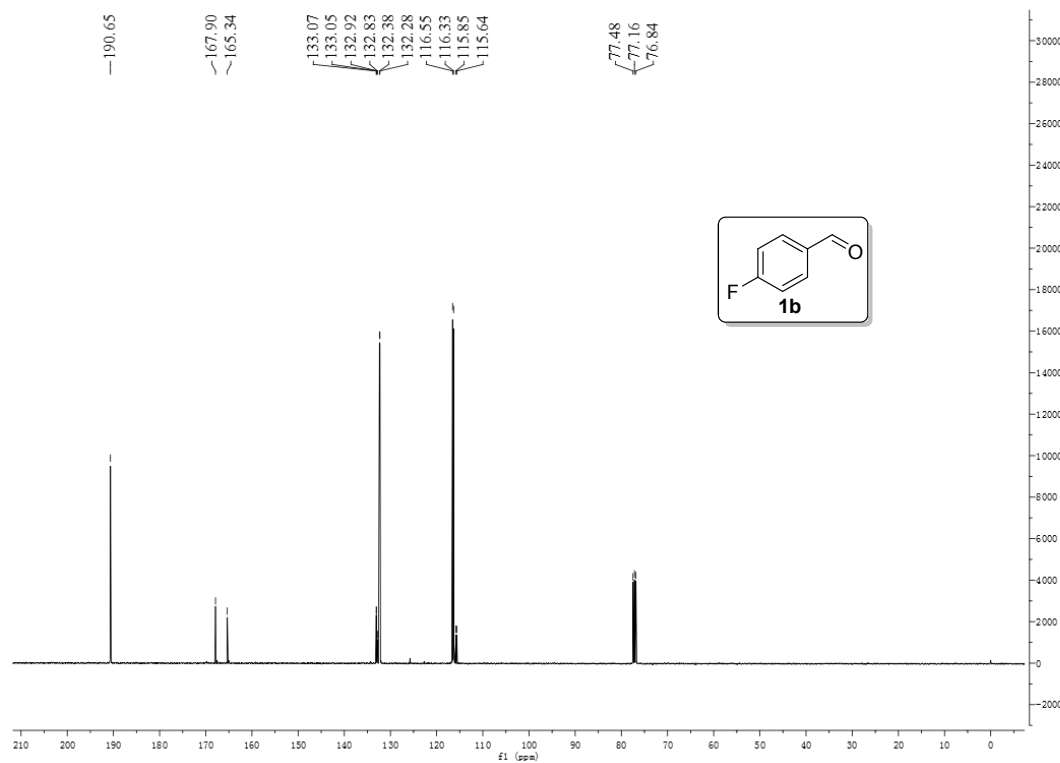



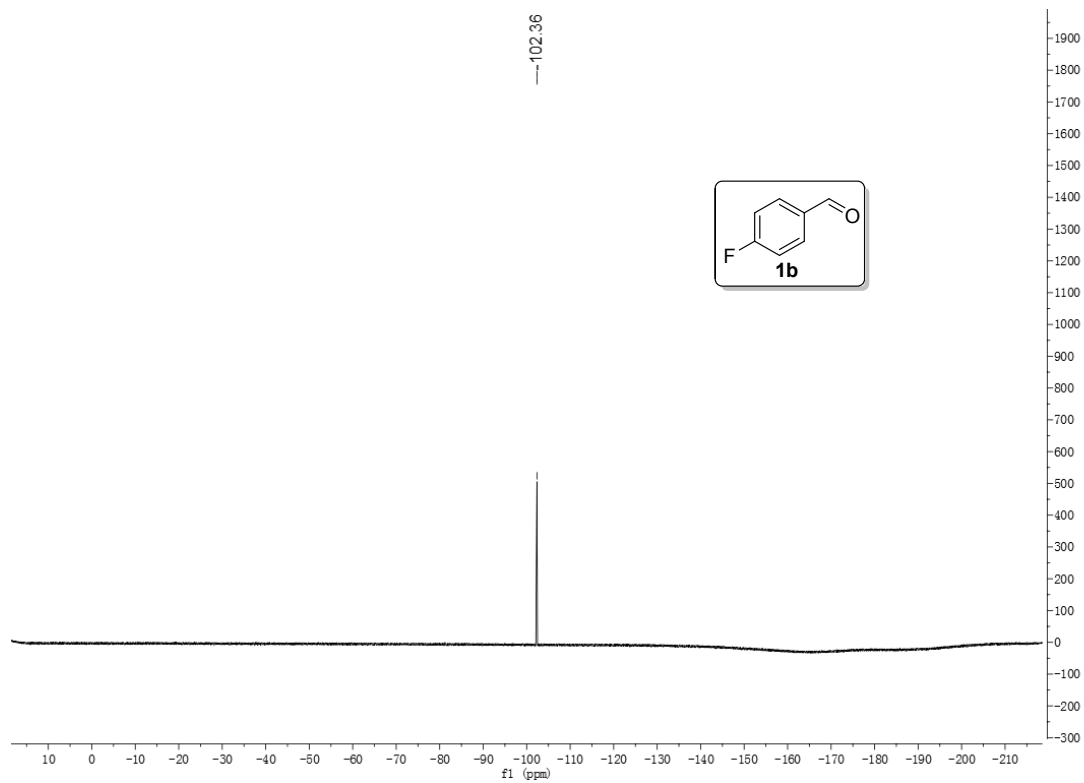

### 3-Chlorobenzaldehyde(1c)

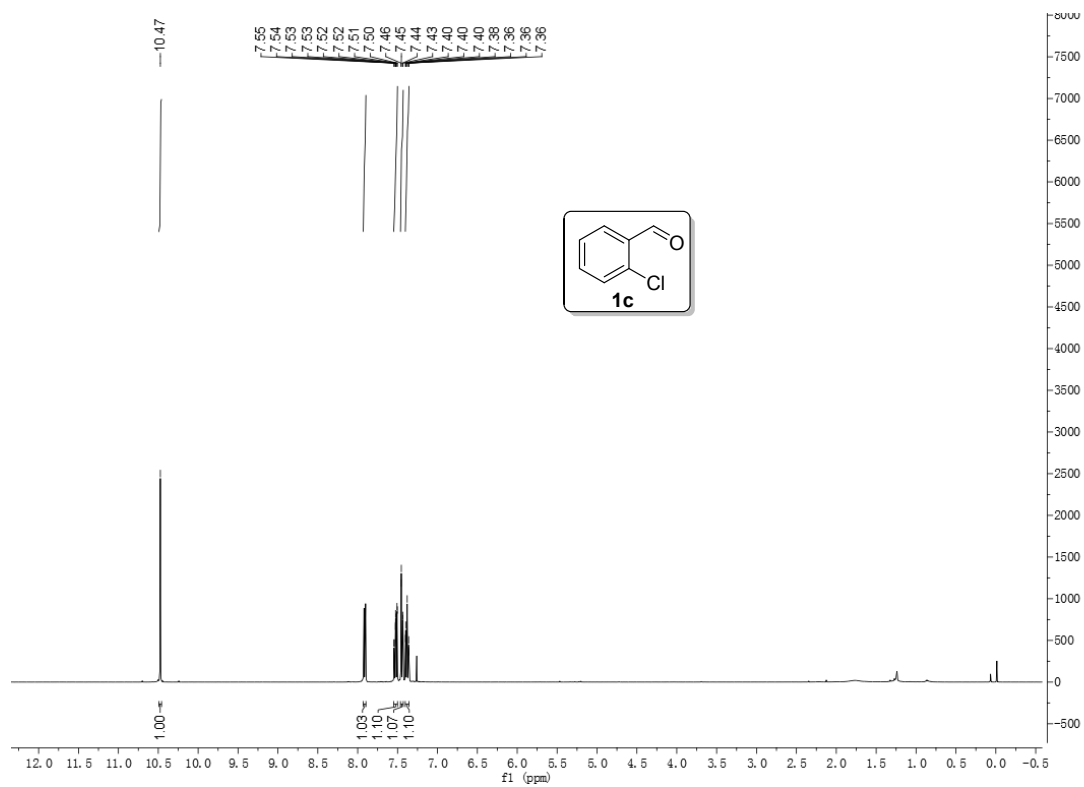

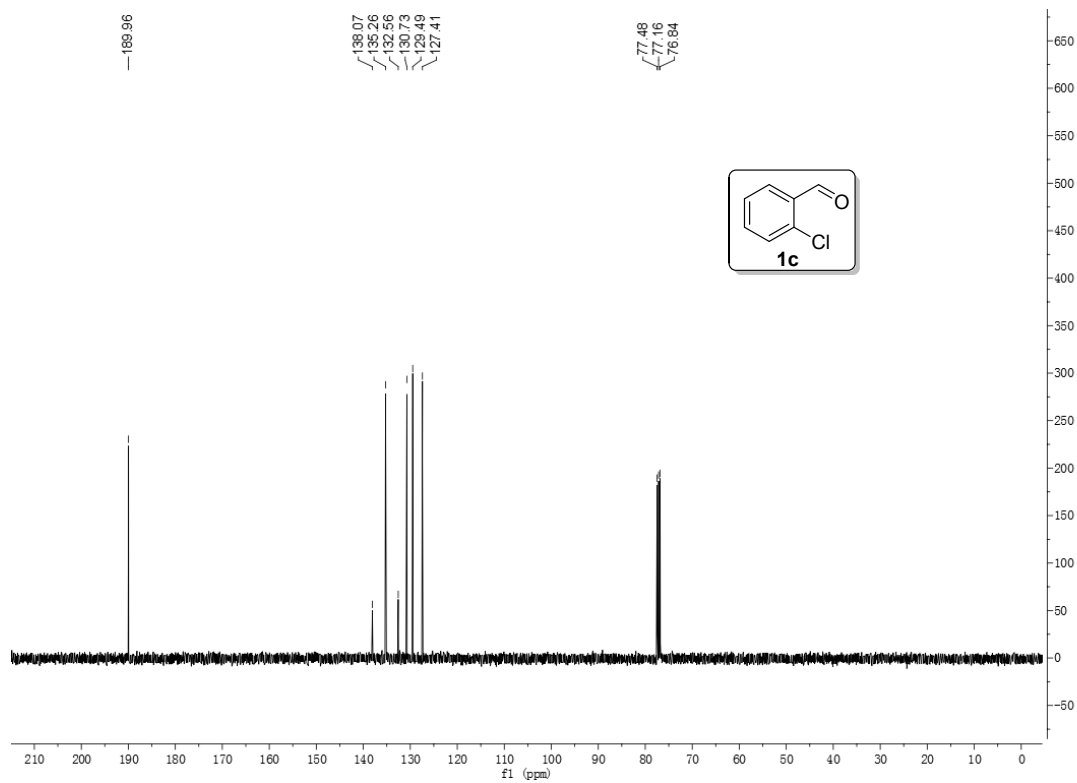

#### 4-Chlorobenzaldehyde(1d)

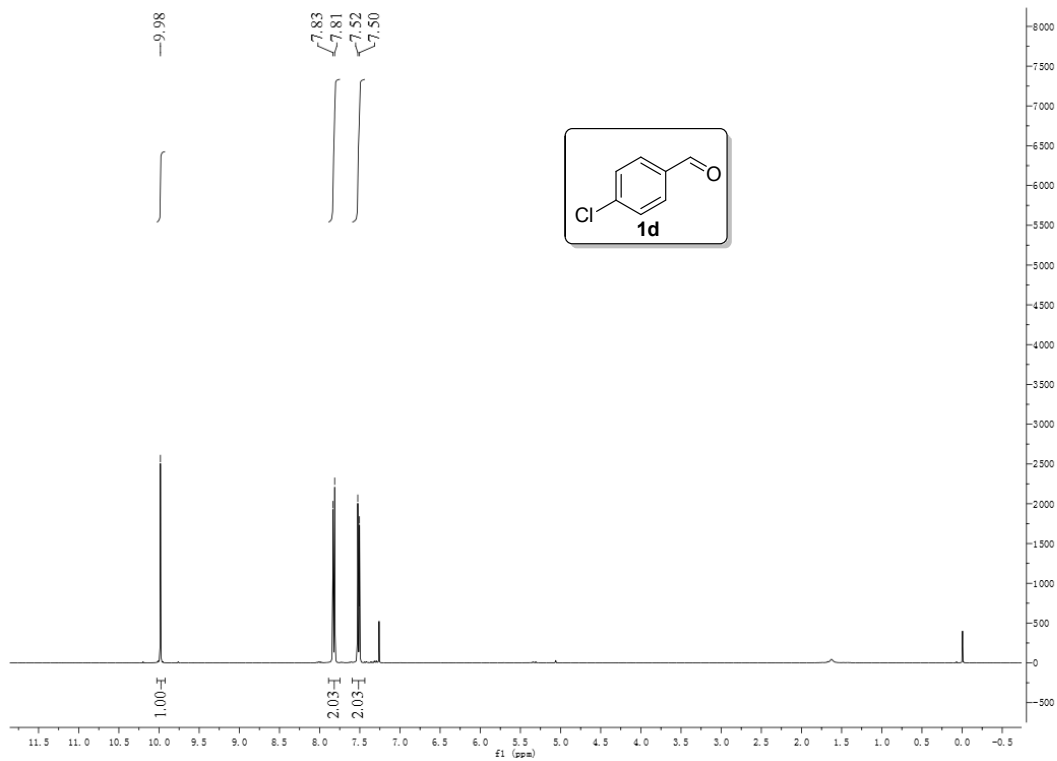

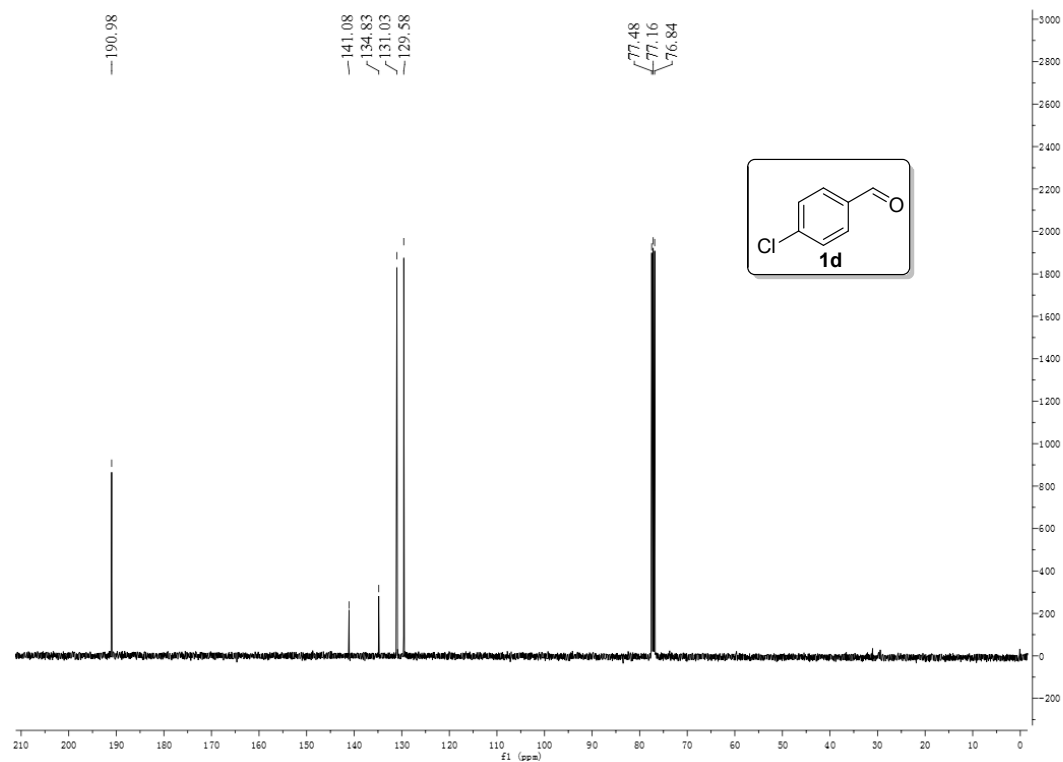

### 2-Bromobenzaldehyde(1e)

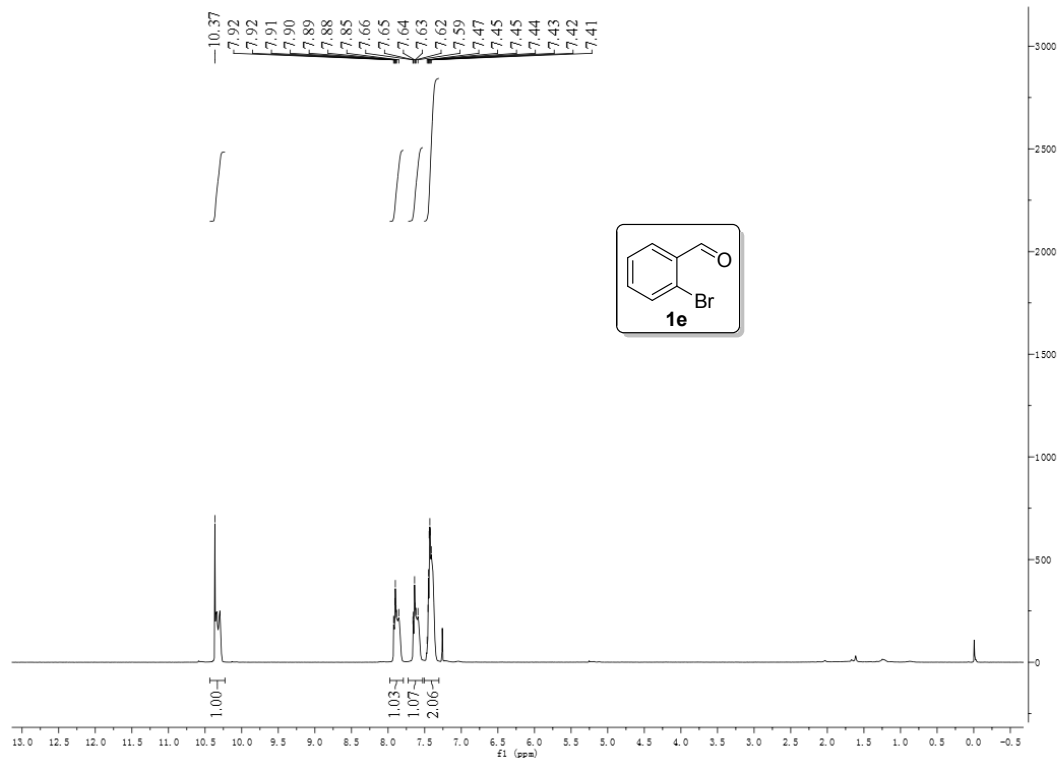

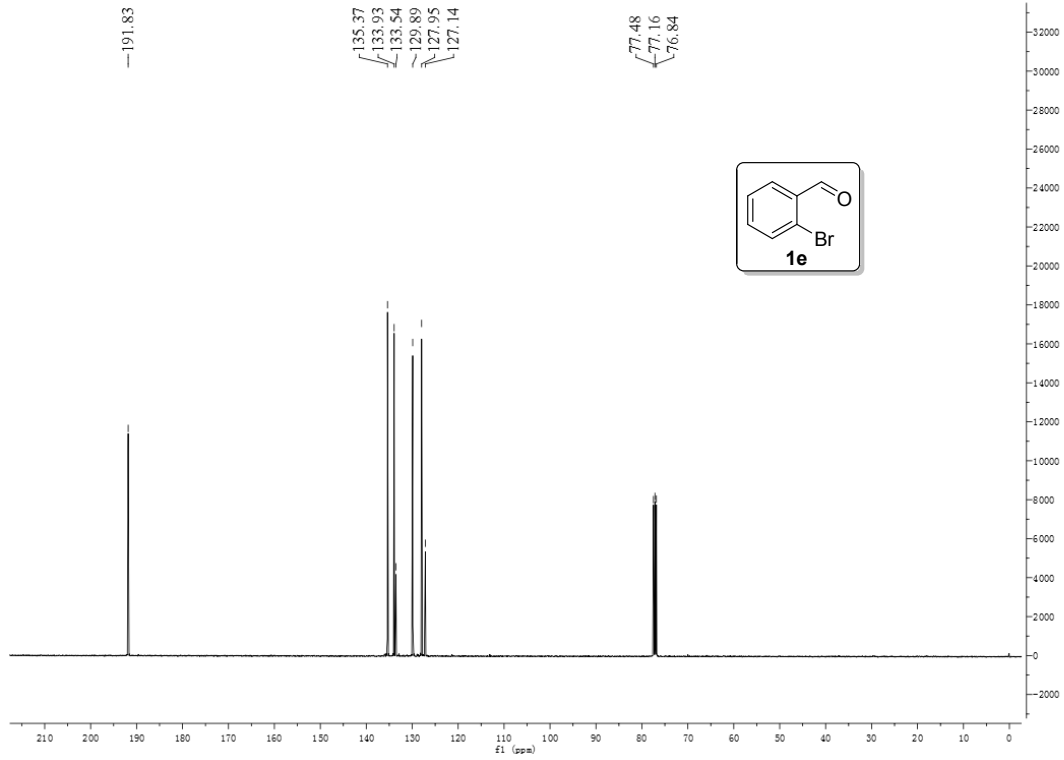

**4-Bromobenzaldehyde(1f)**

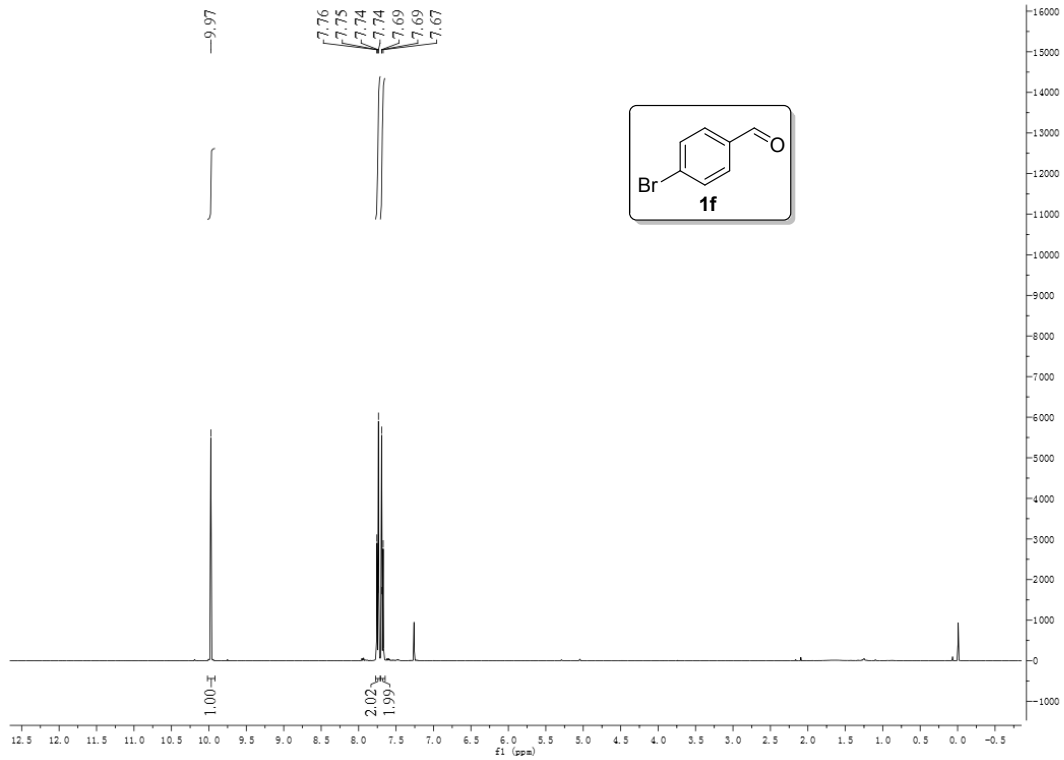

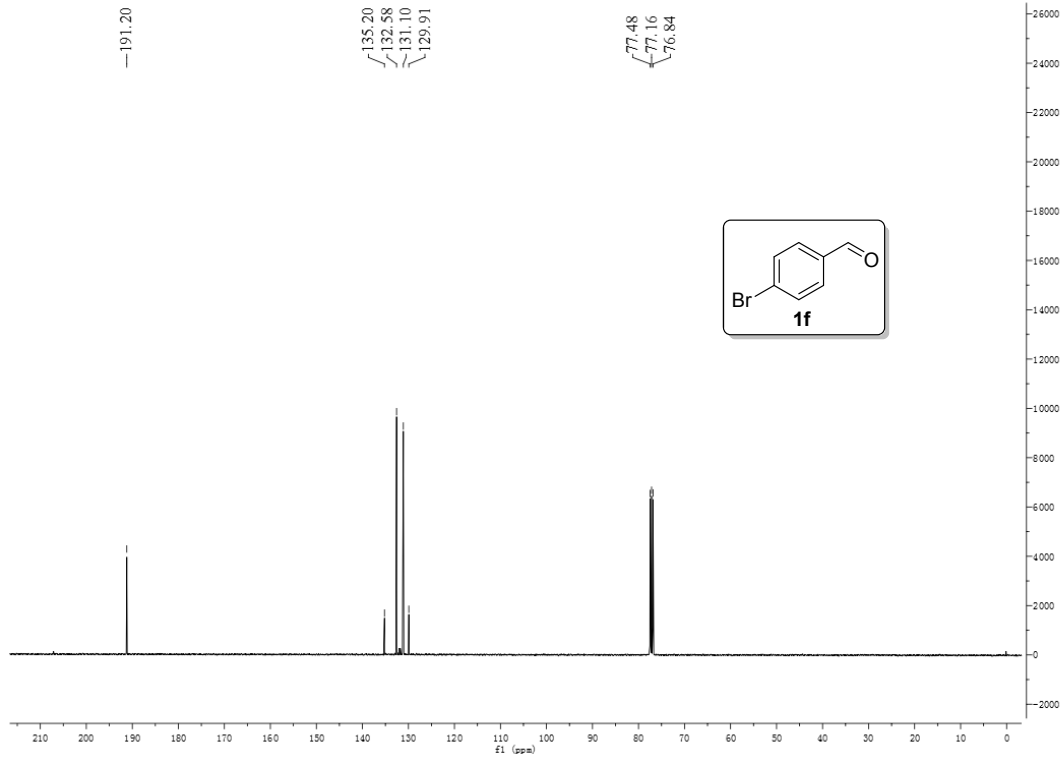

### 2-Iodobenzaldehyde(1g)

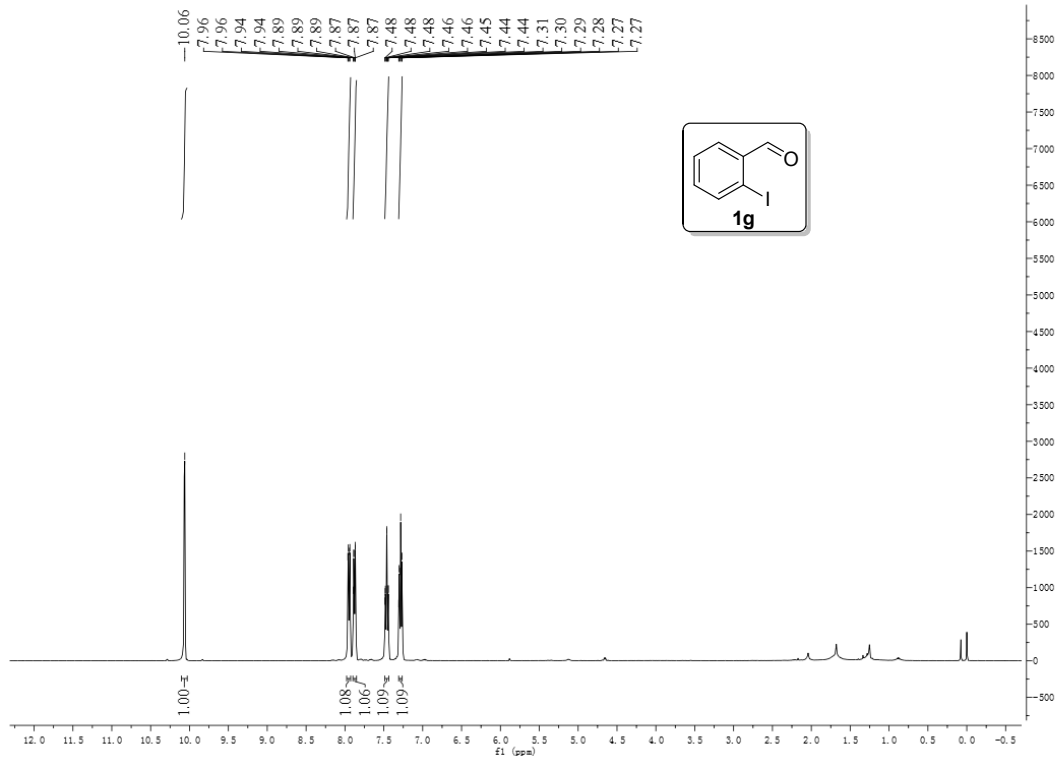

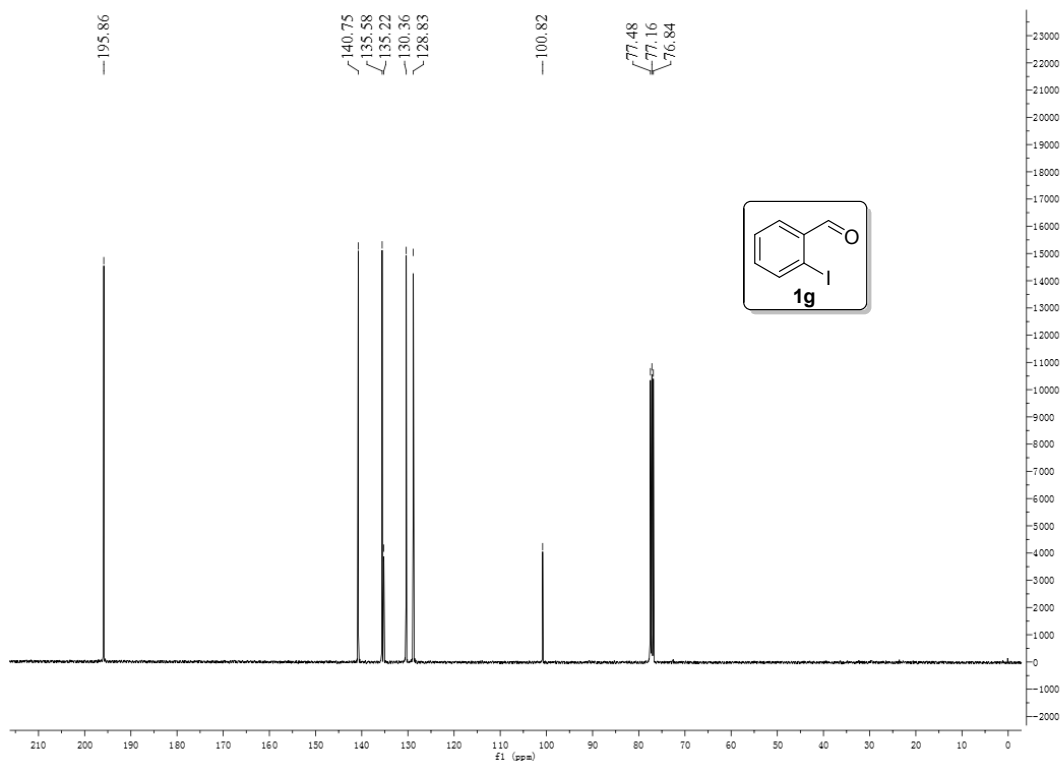

### 4-Iodobenzaldehyde(1h)

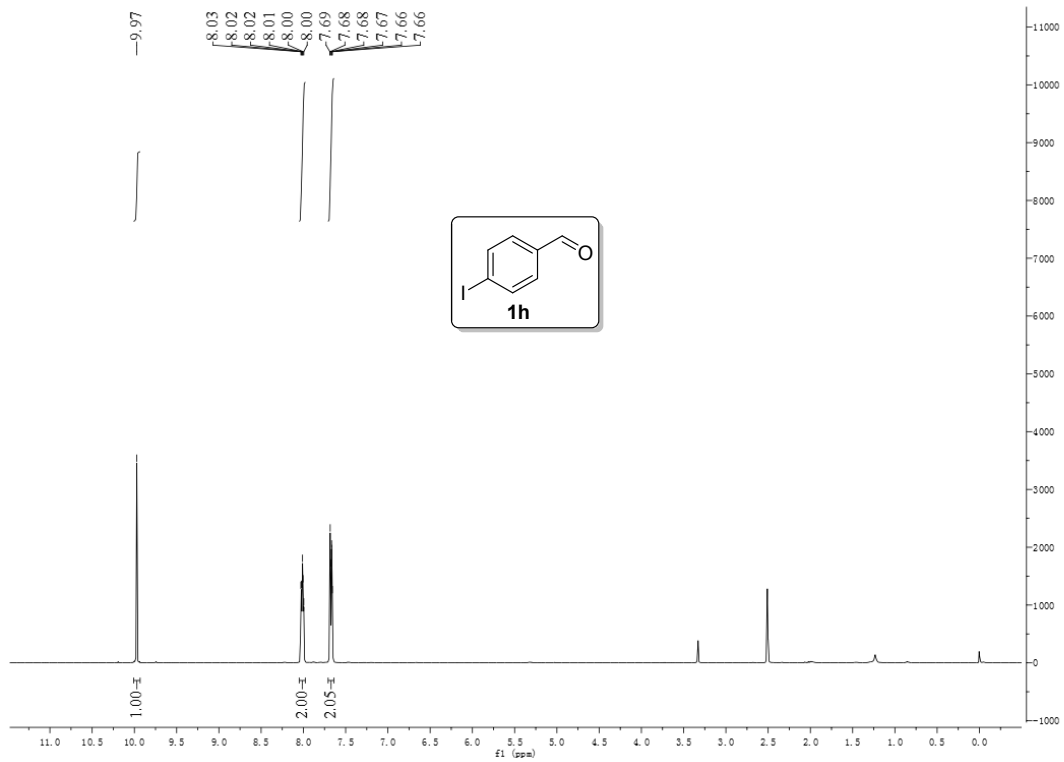

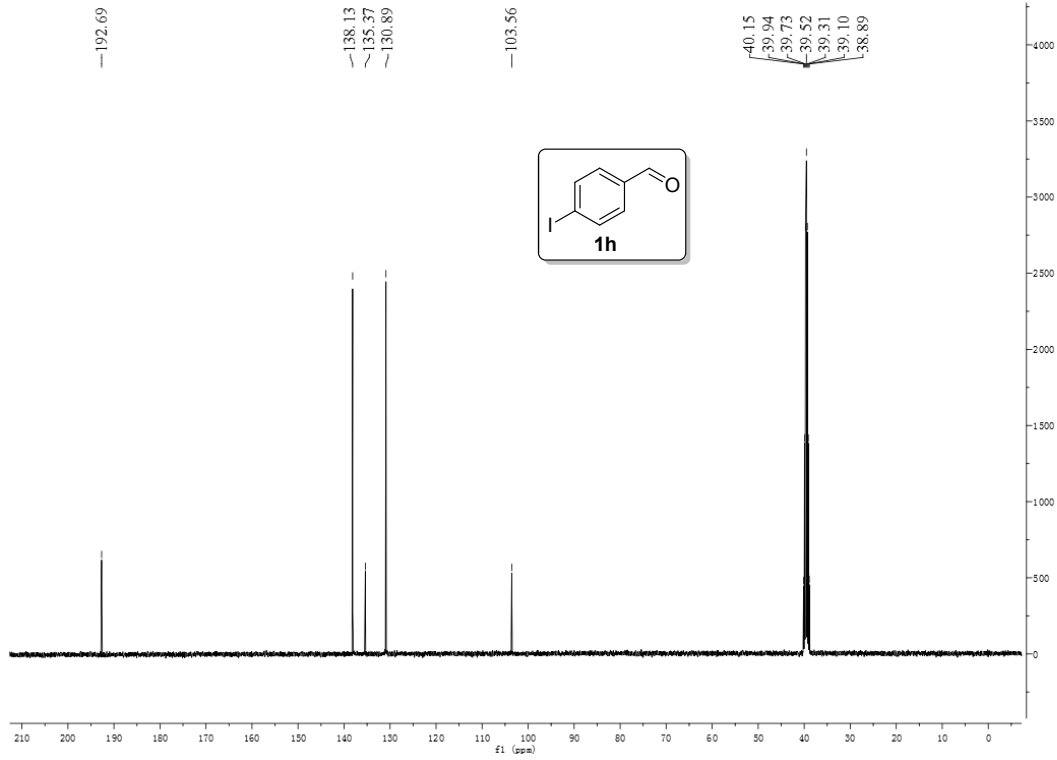

**3-Methoxybenzaldehyde(1i)**

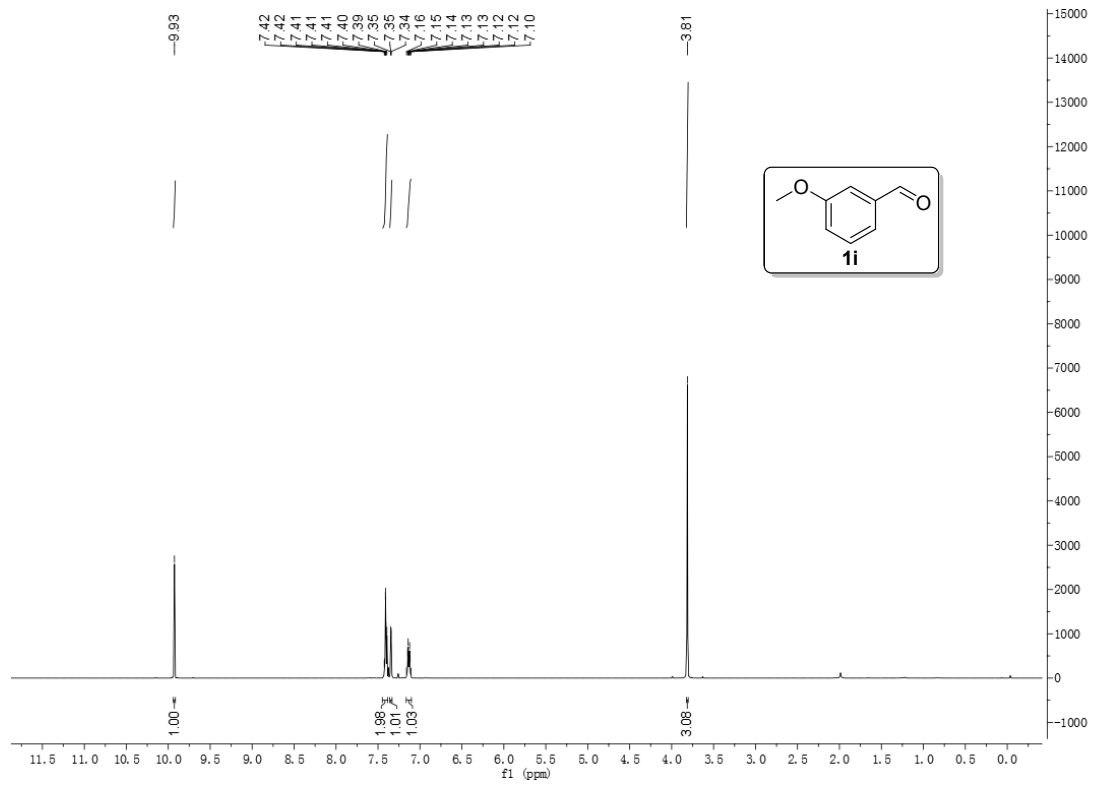

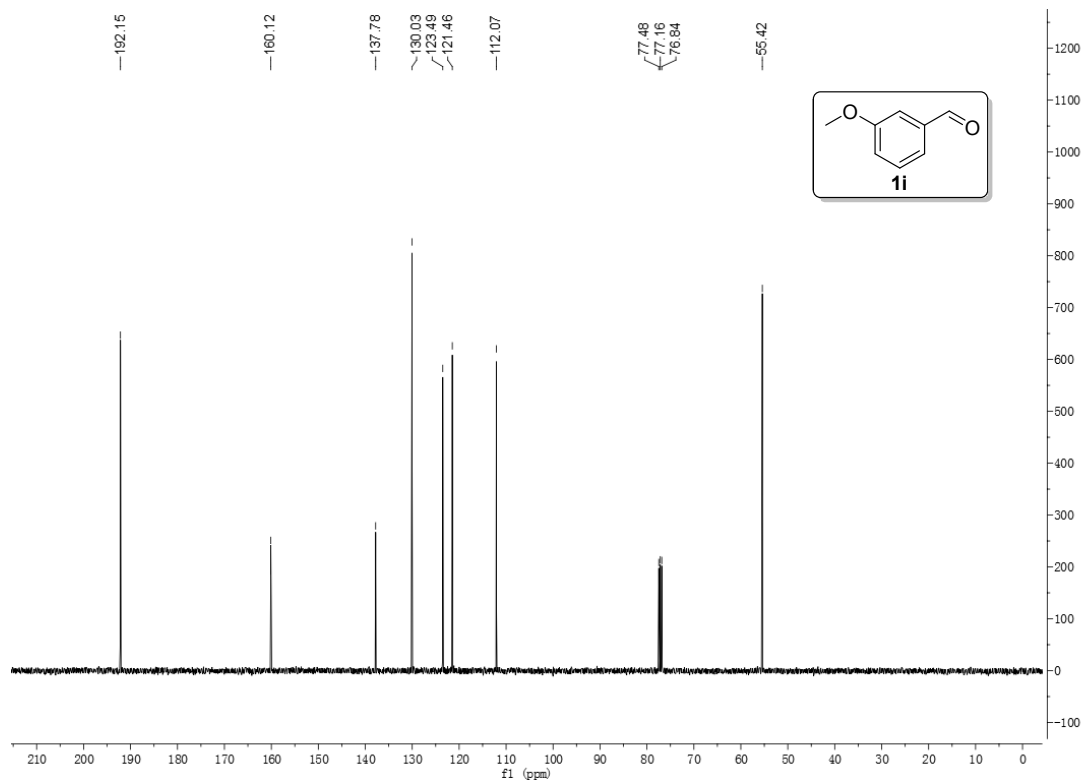

#### 4-Methoxybenzaldehyde(1j)

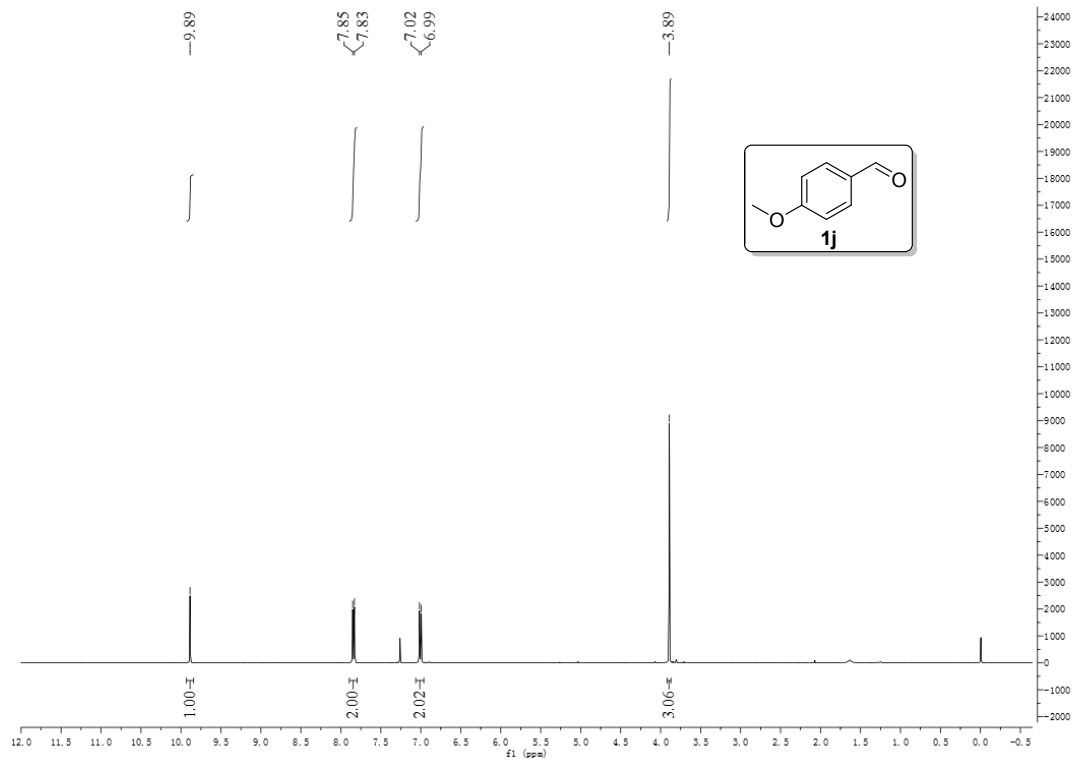



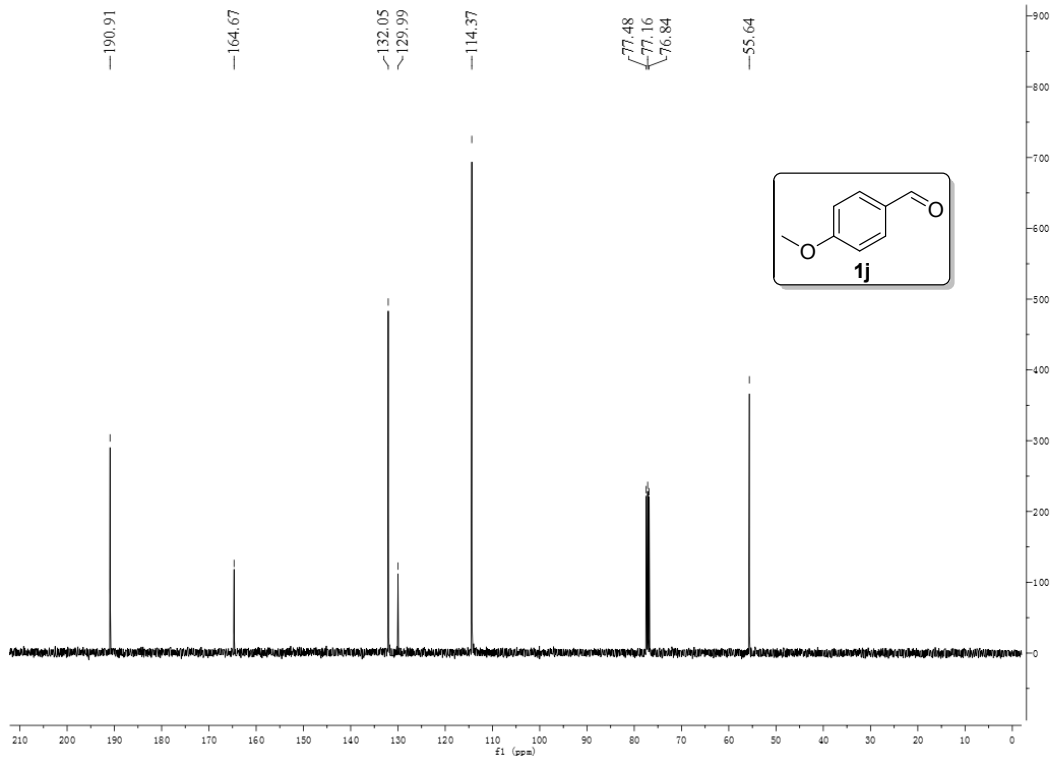

### 4-tert-Butylbenzaldehyde(1k)

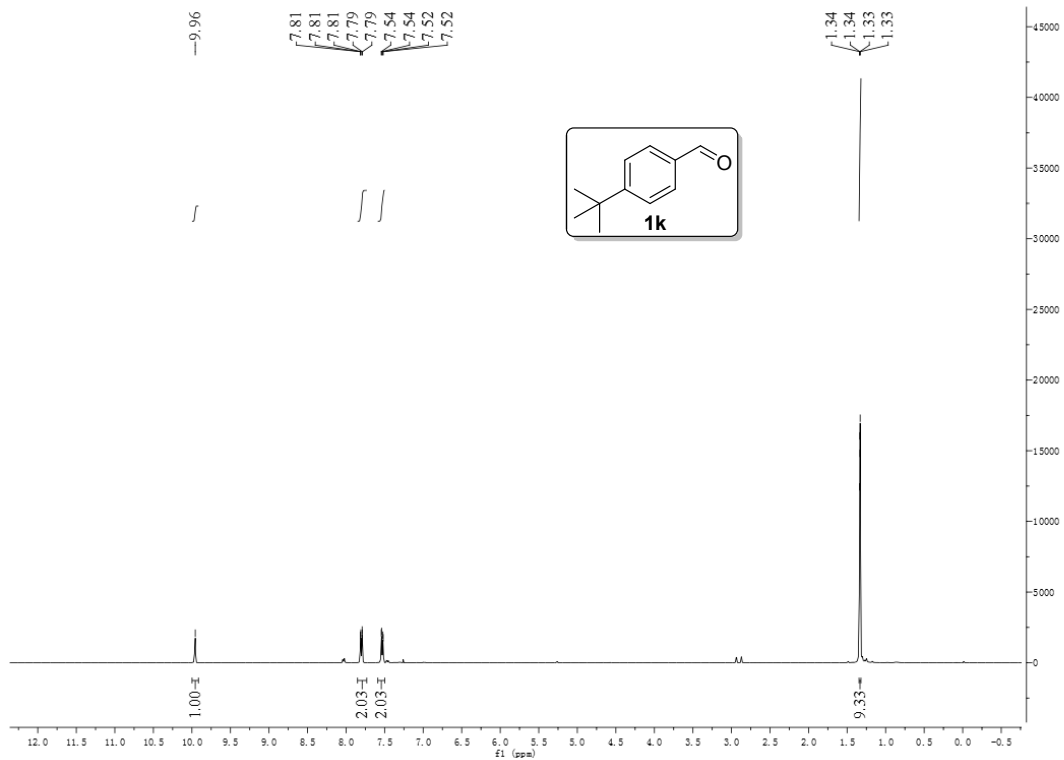

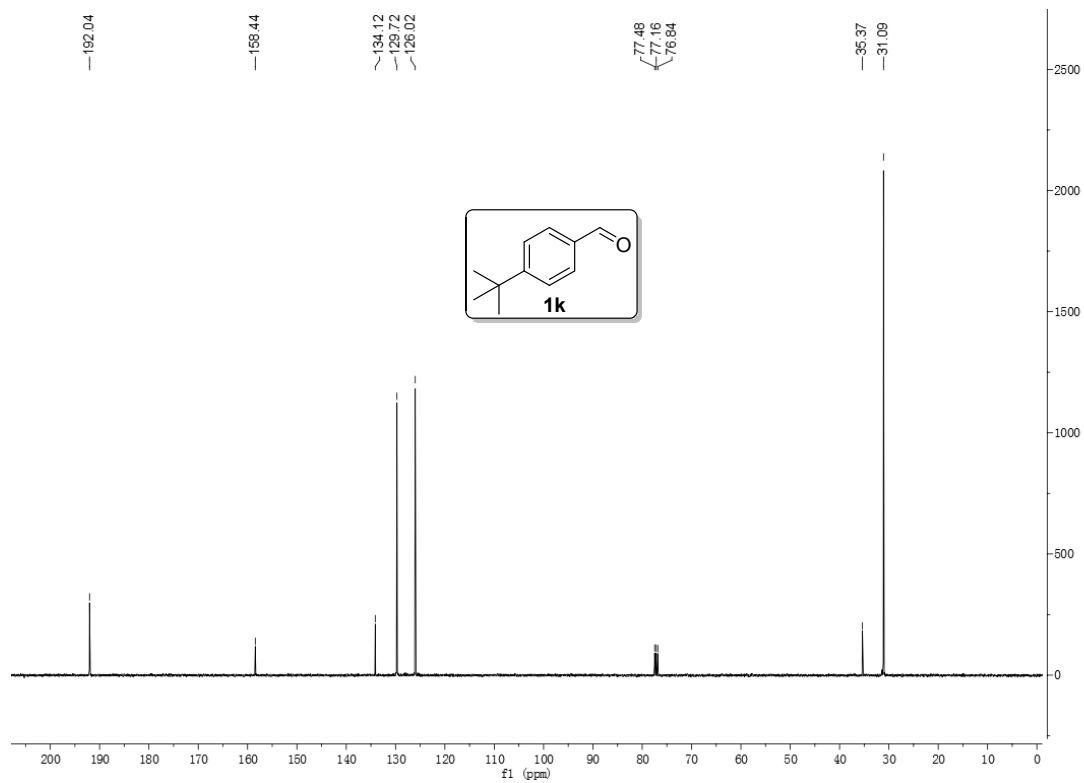

### 2-Nitrobenzaldehyde(1l)

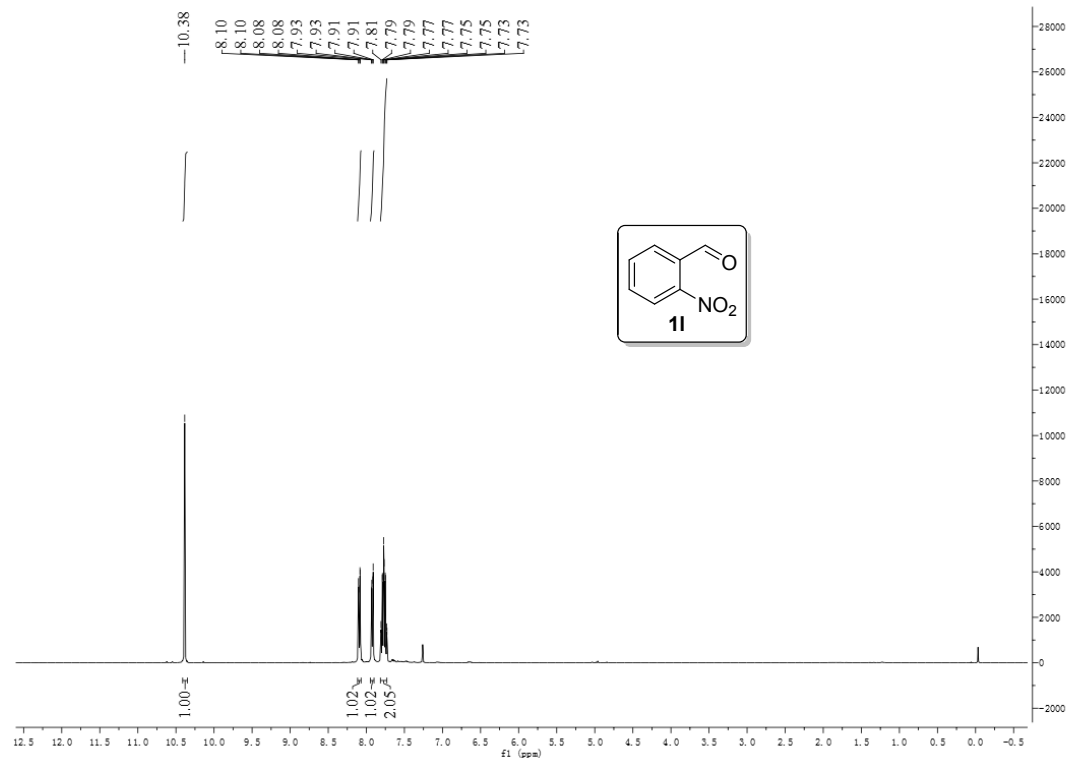

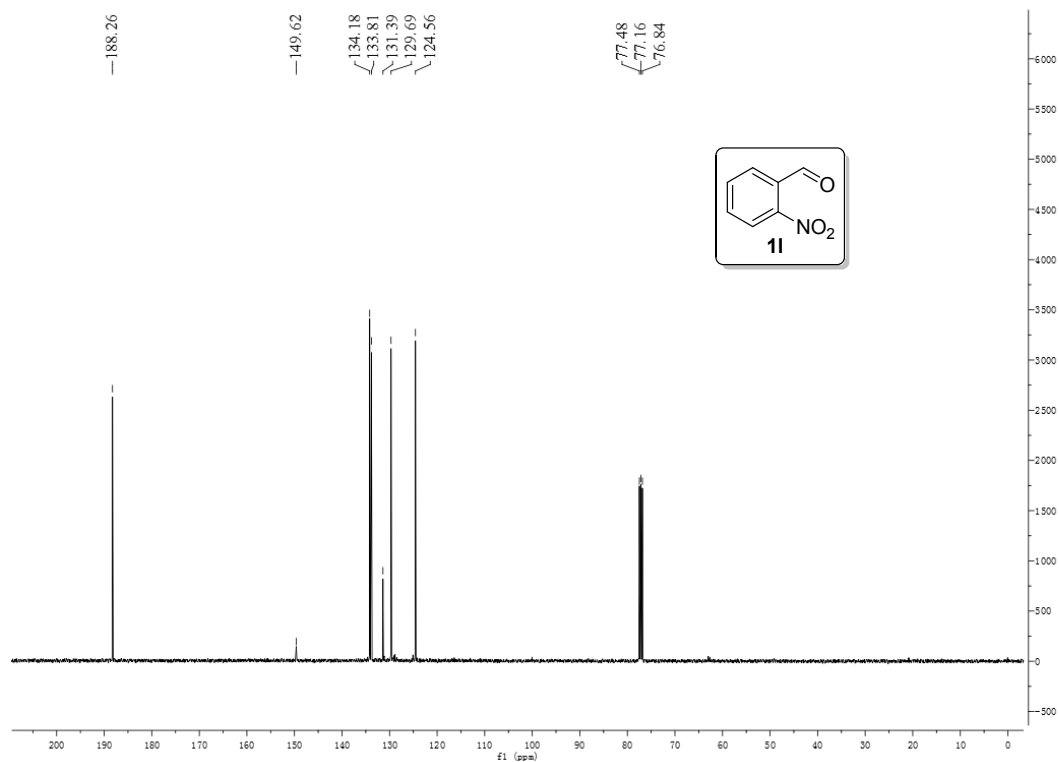

### 3-Nitrobenzaldehyde(1m)

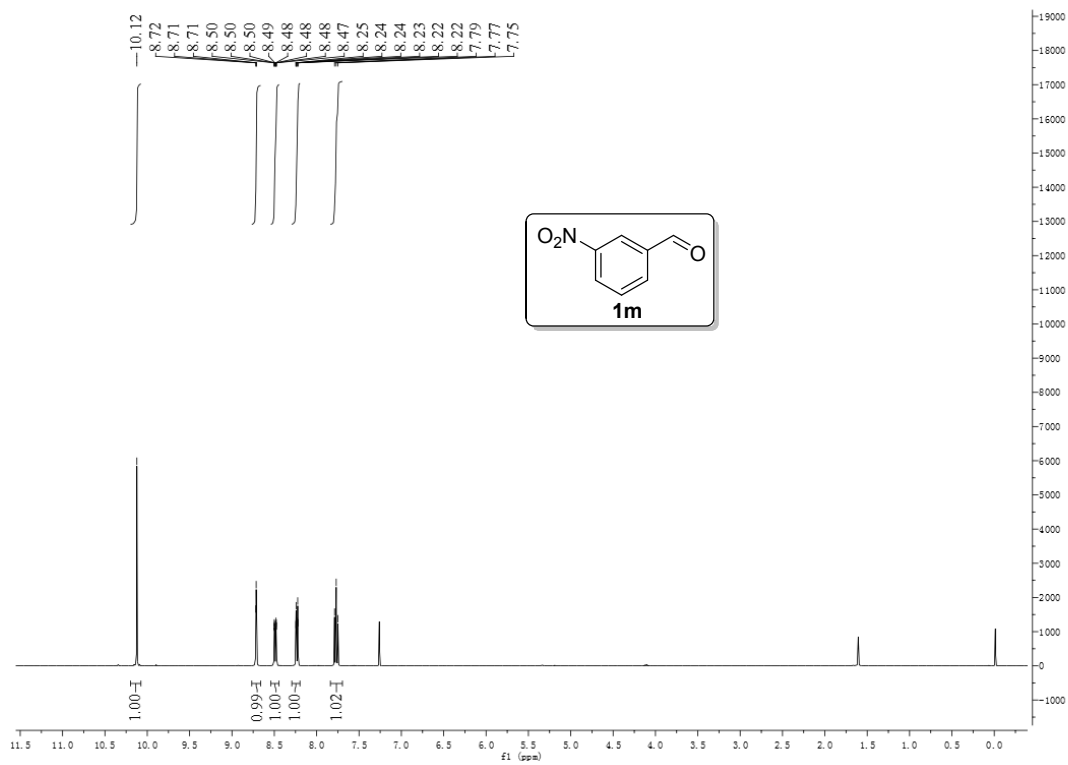

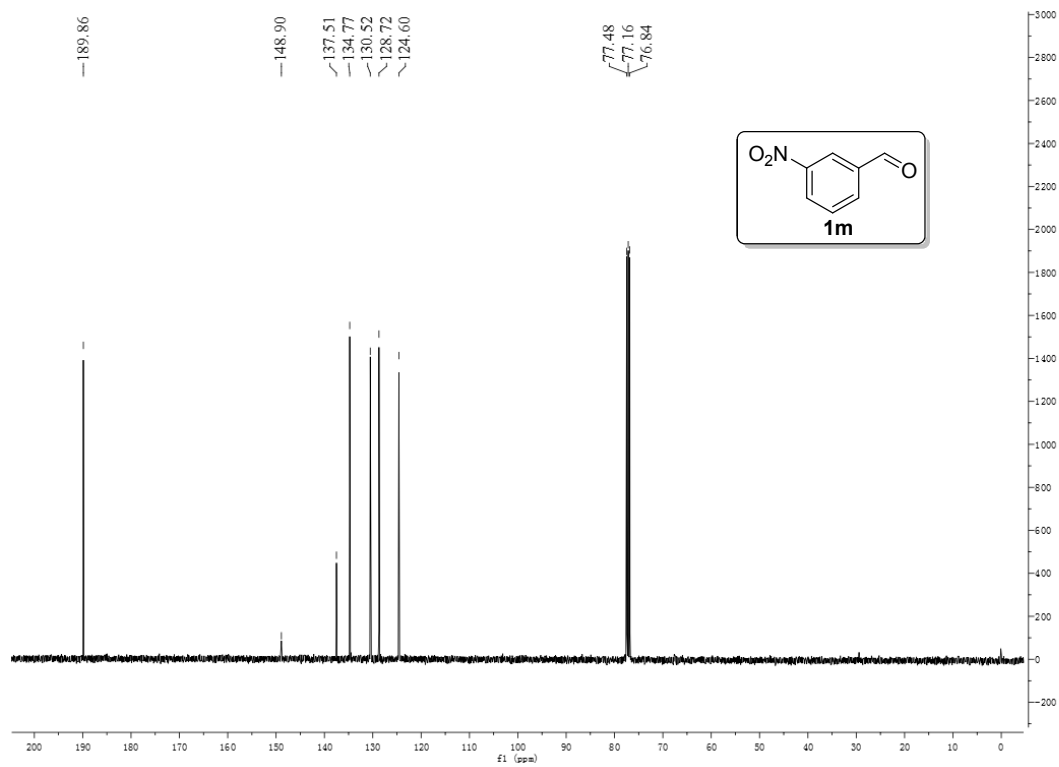

### 4-Nitrobenzaldehyde(1n)

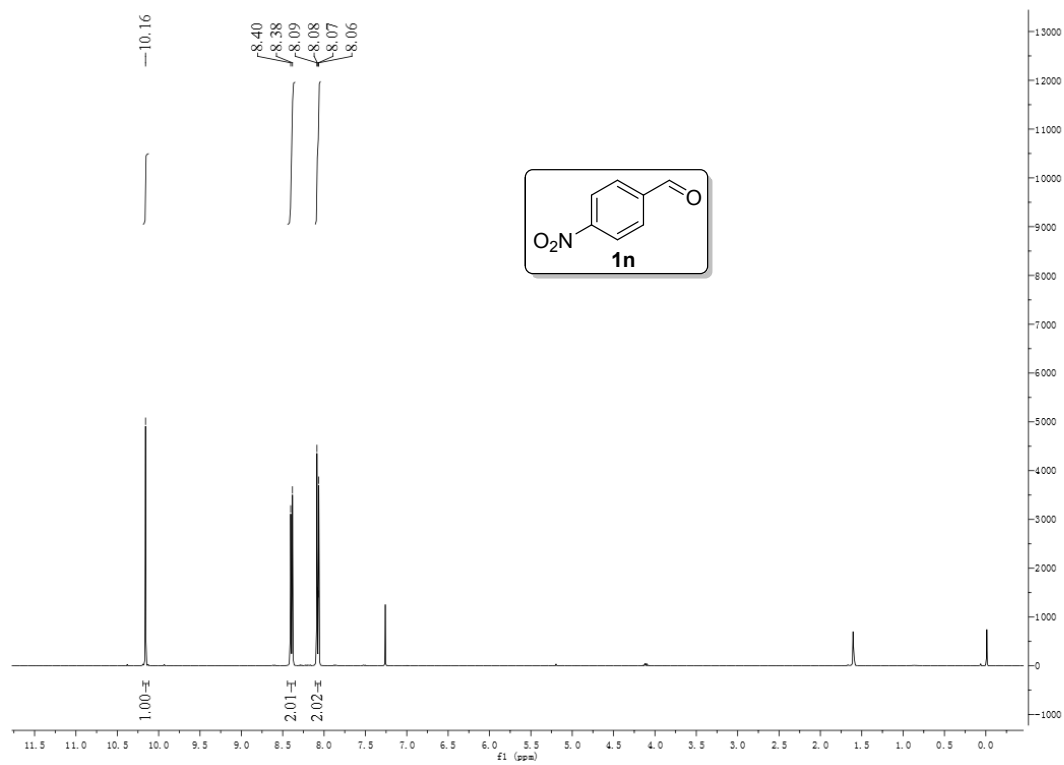

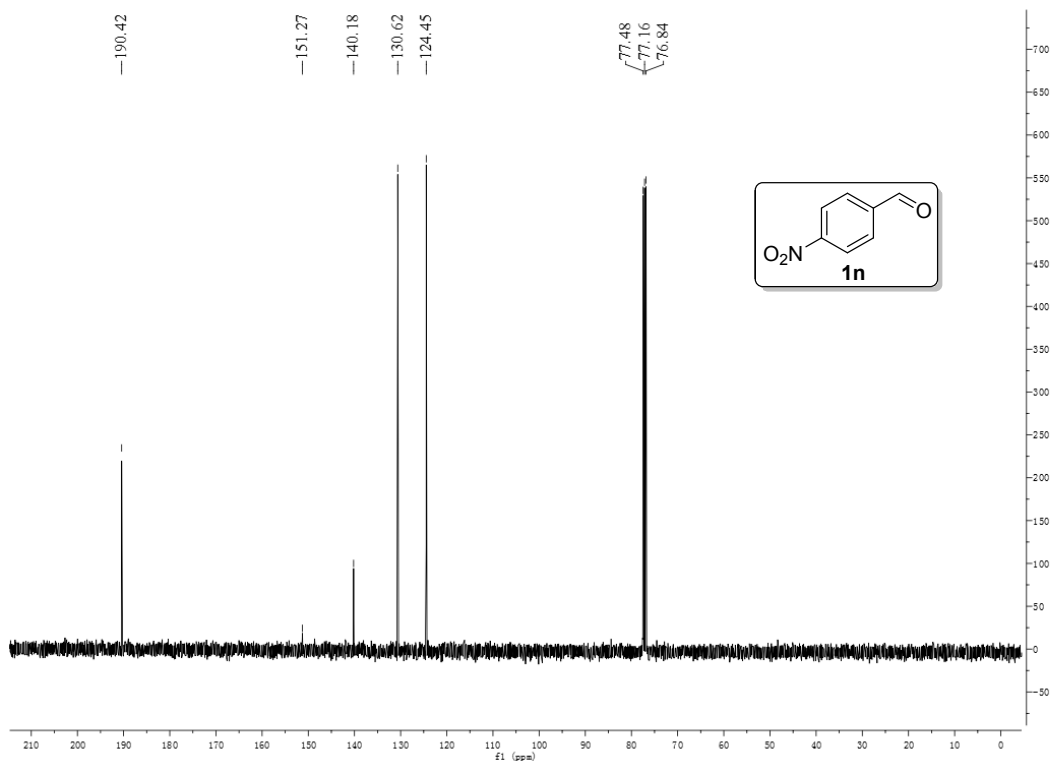

### 4-Methylbenzaldehyde(**1o**)

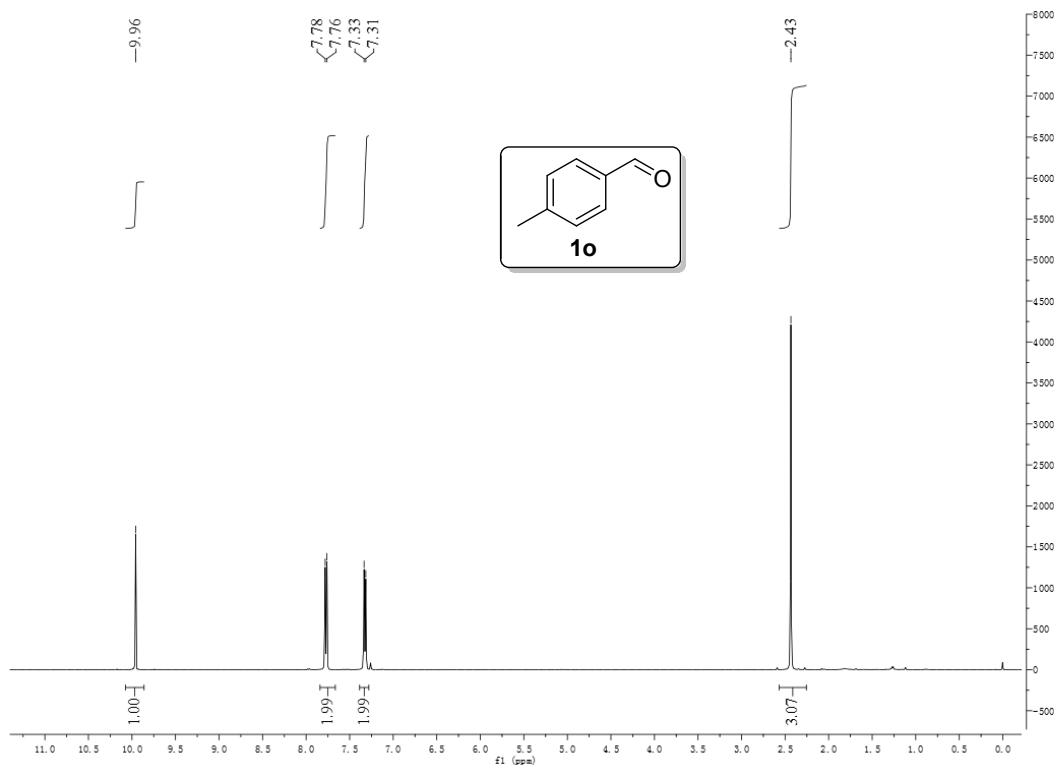

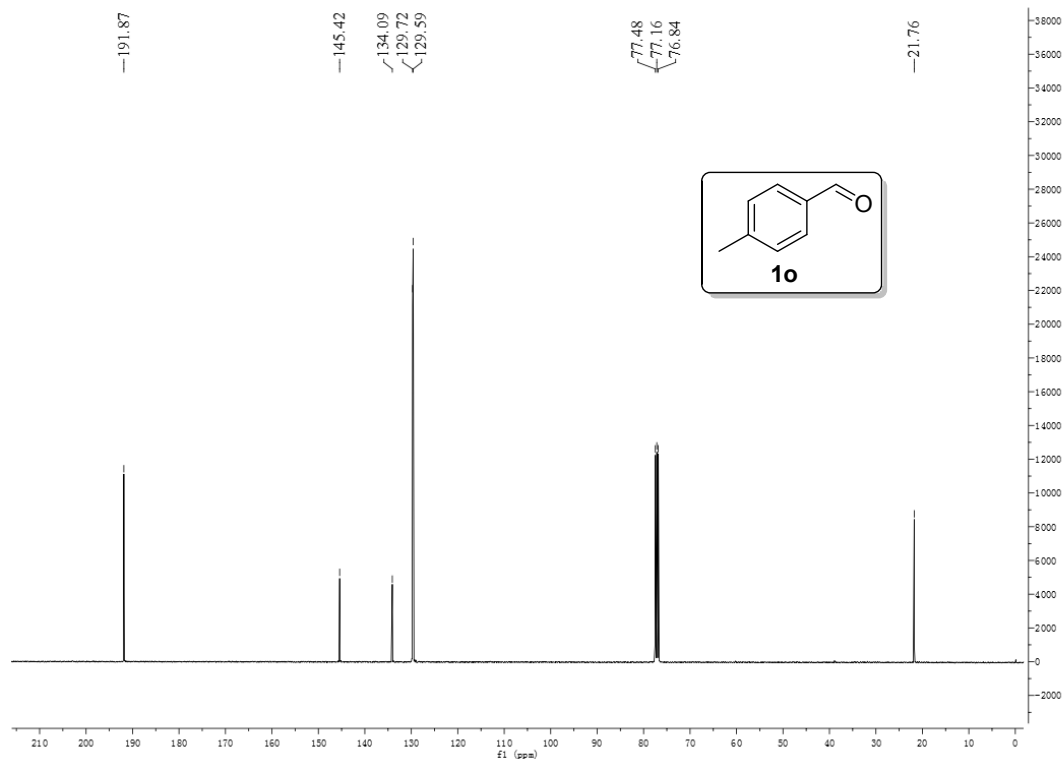

### 2,6-Difluorobenzaldehyde(2a)

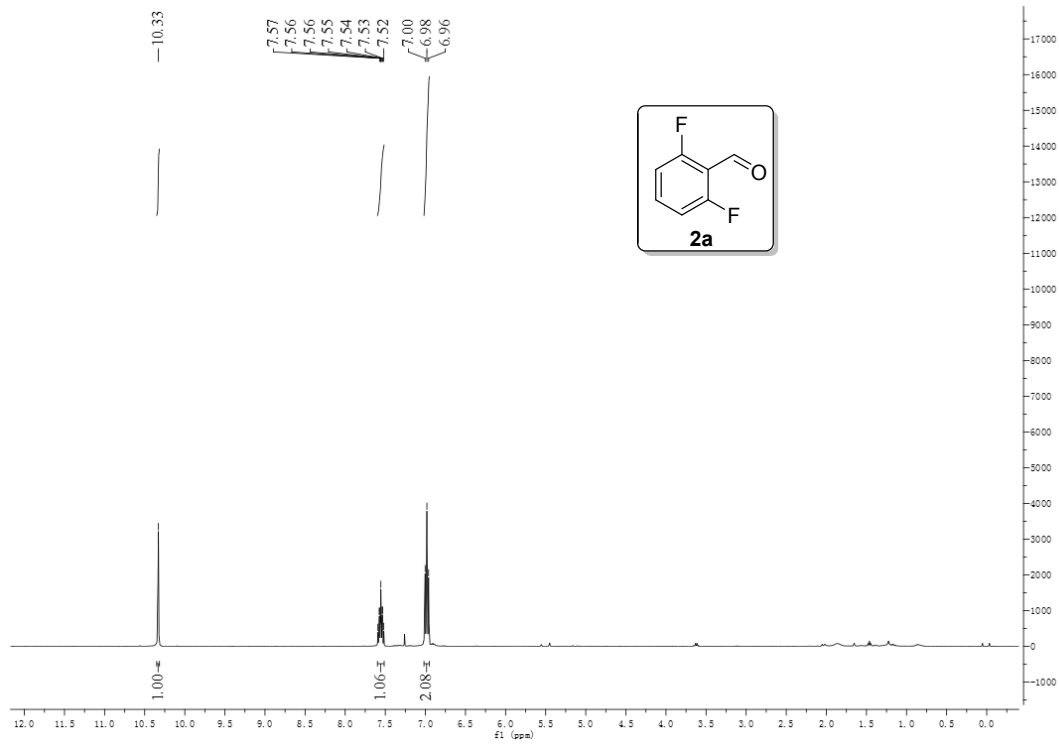

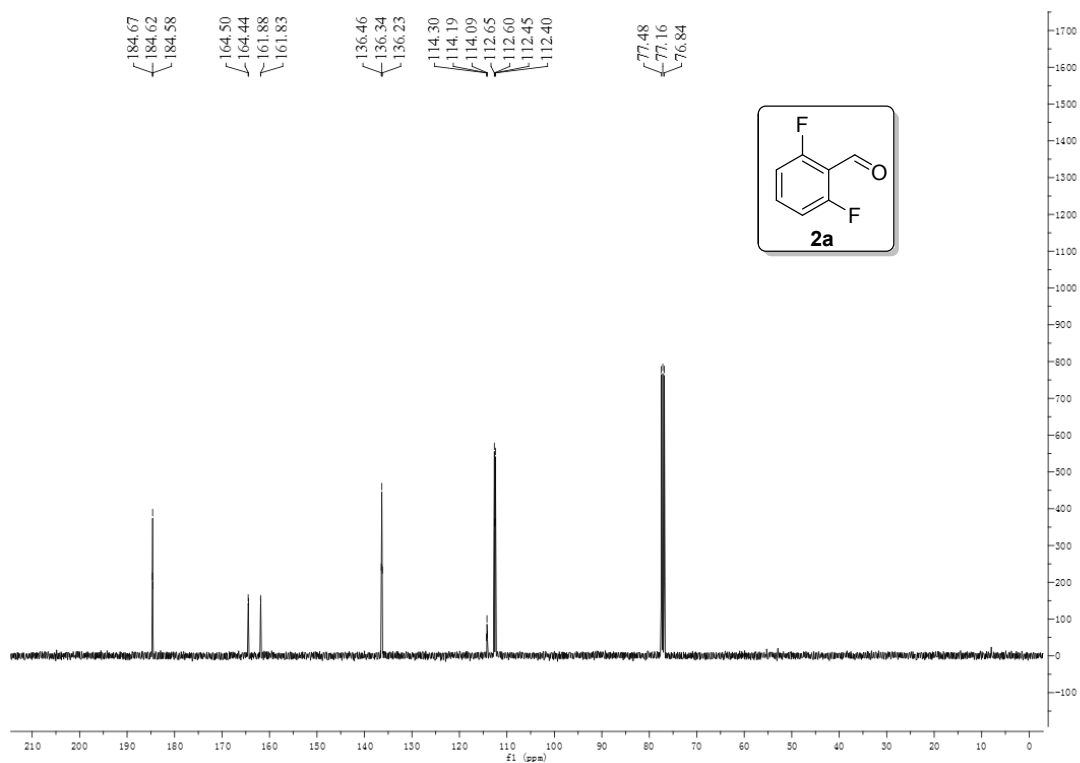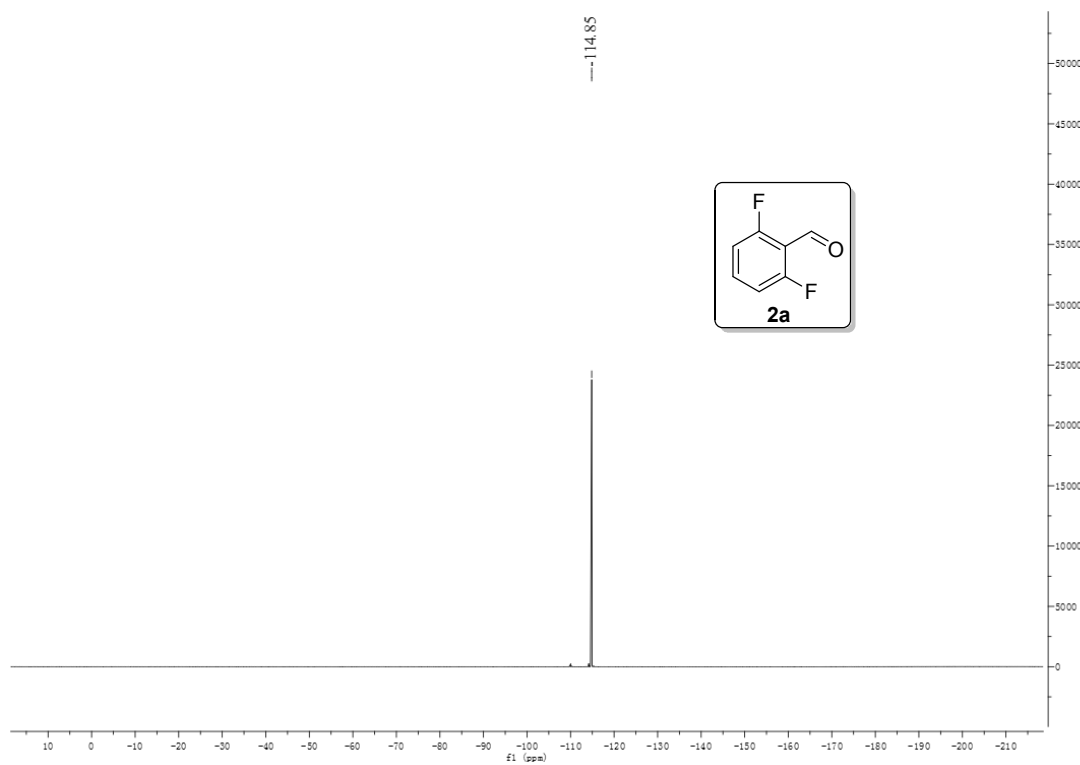

2-Chloro-6-fluorobenzaldehyde(2b)

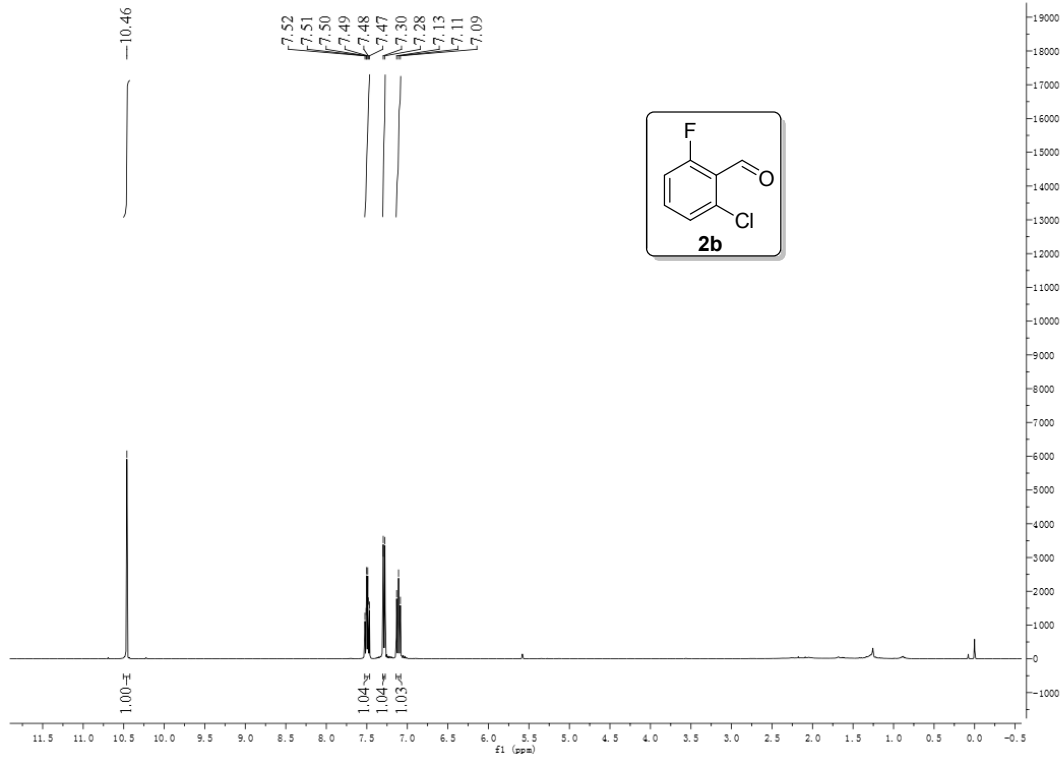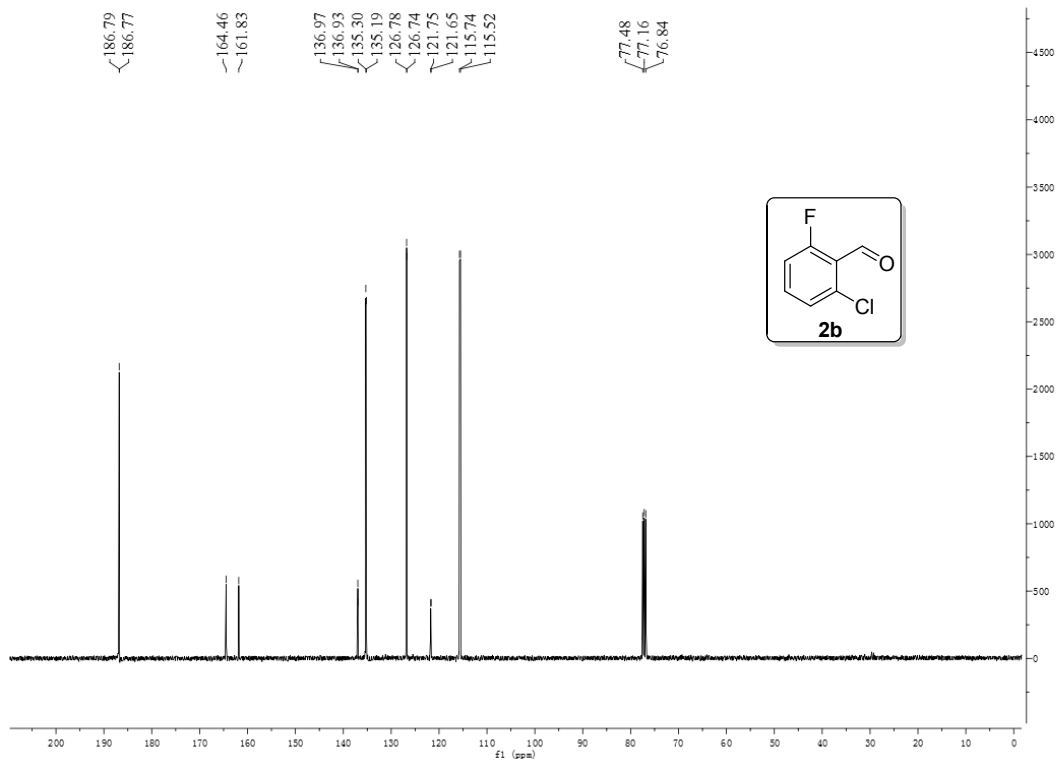



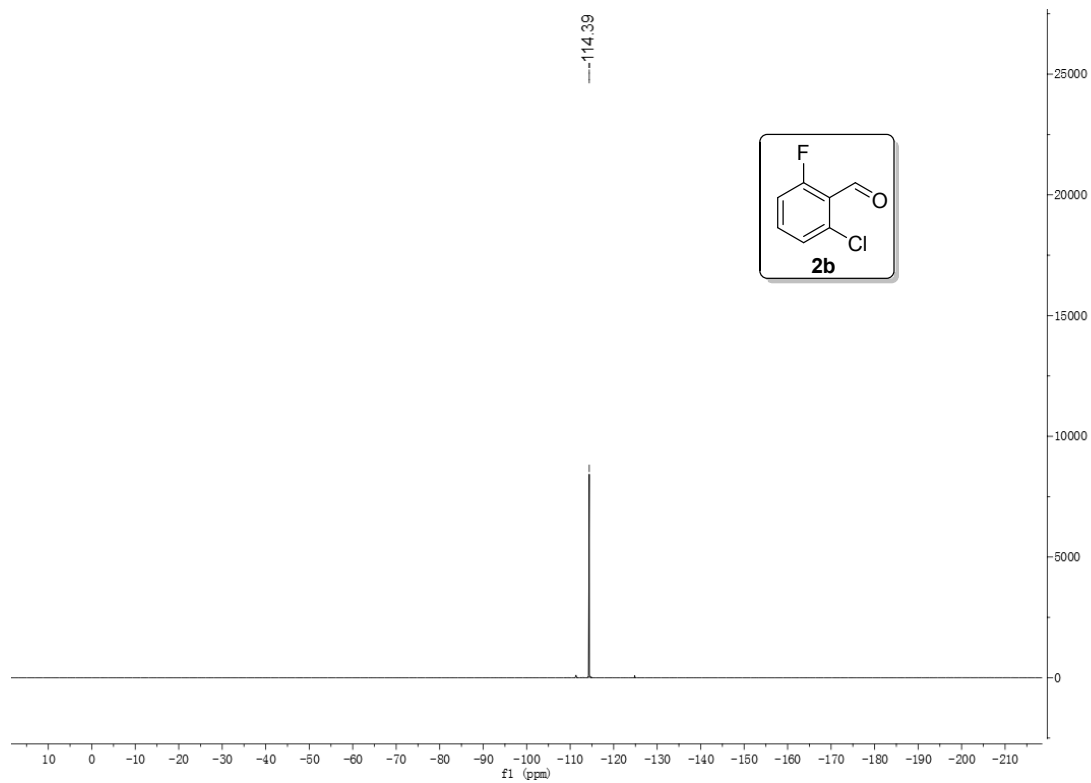

### 3,4-Dichlorobenzaldehyde(2c)

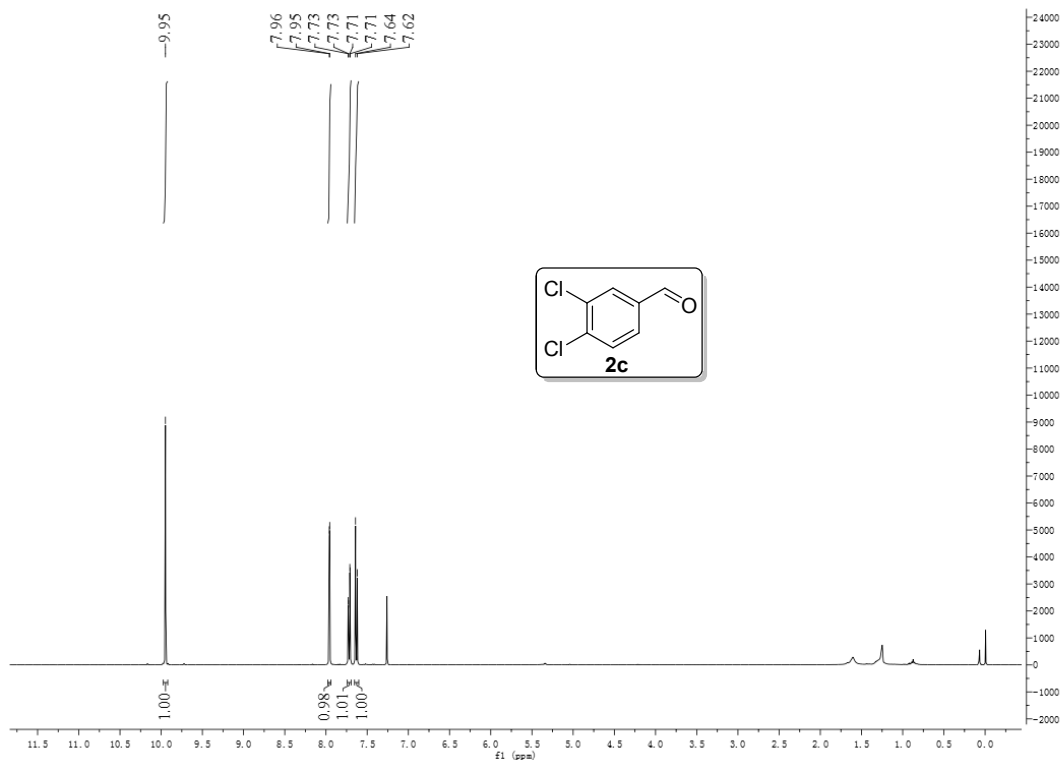

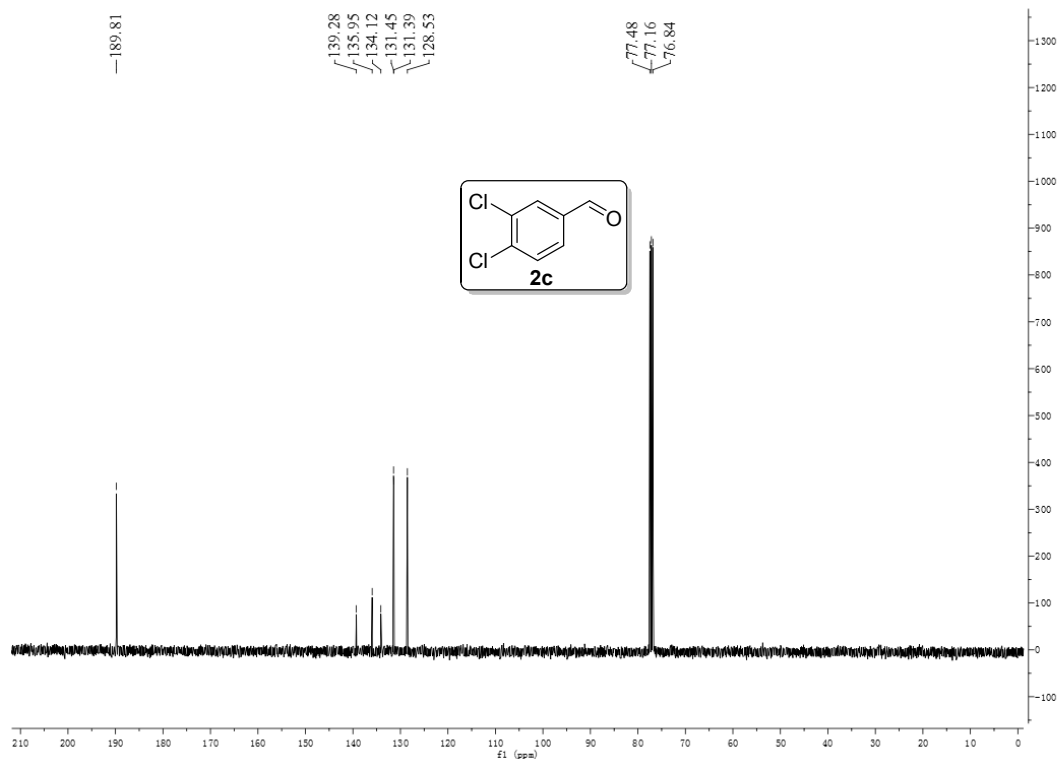

### 3,4-Dimethoxy-benzaldehyde(2d)

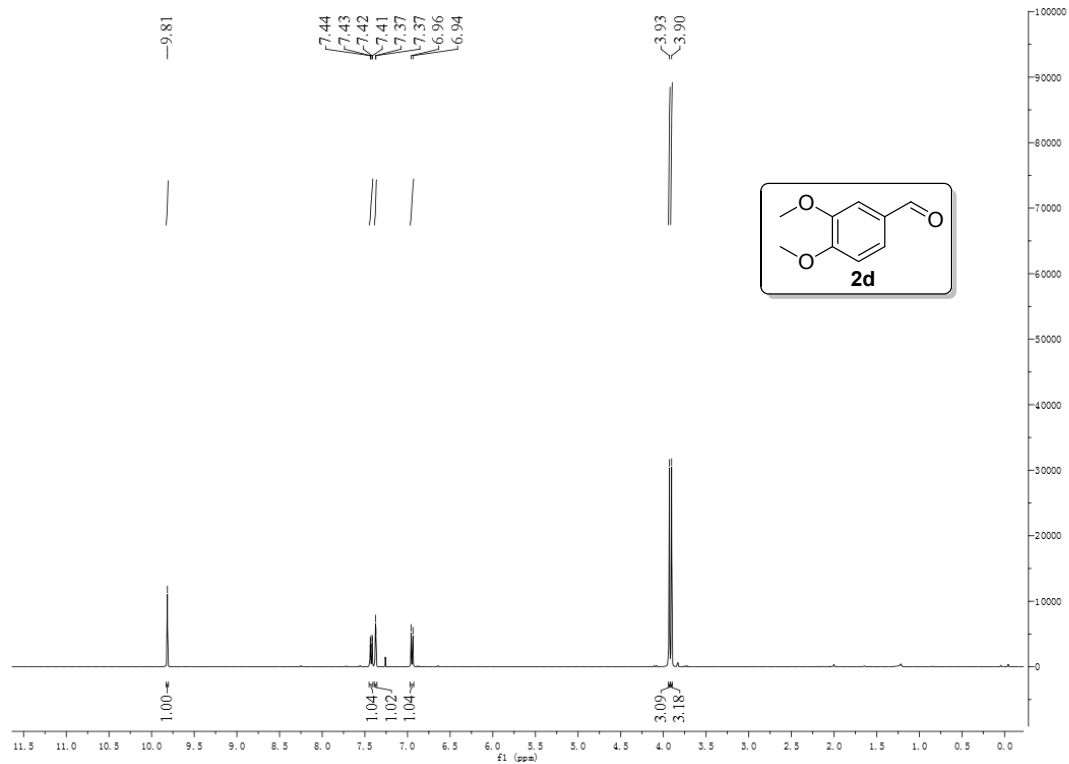

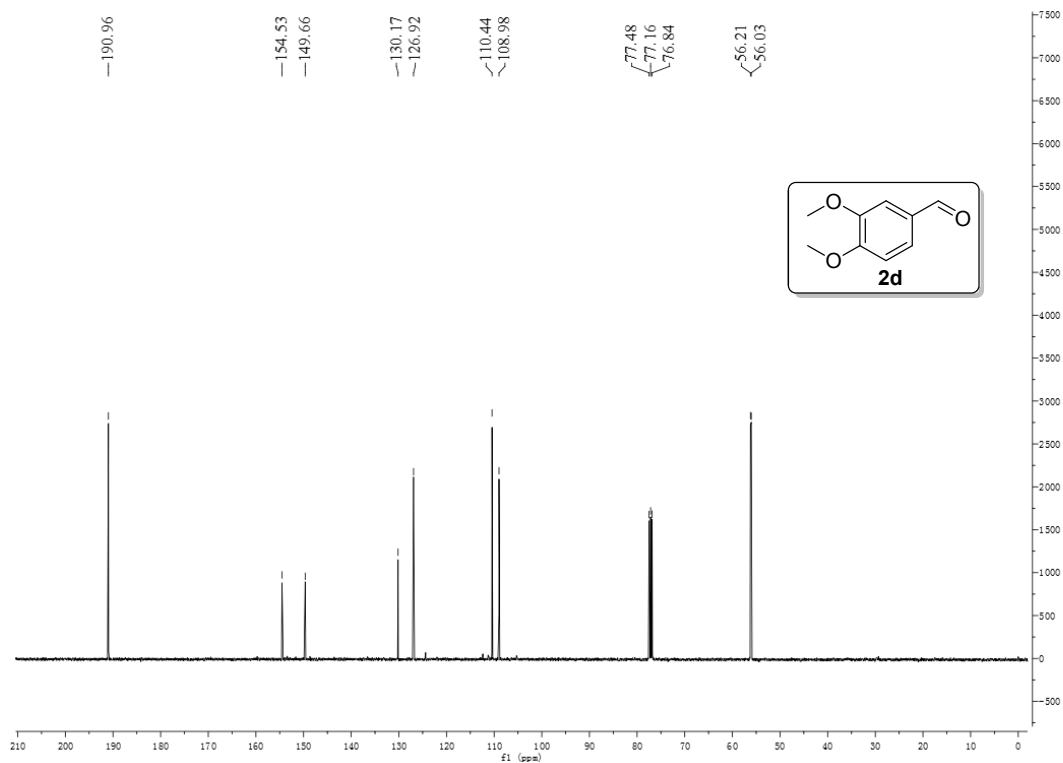

### 5-Bromo-2-methoxybenzaldehyde(2e)

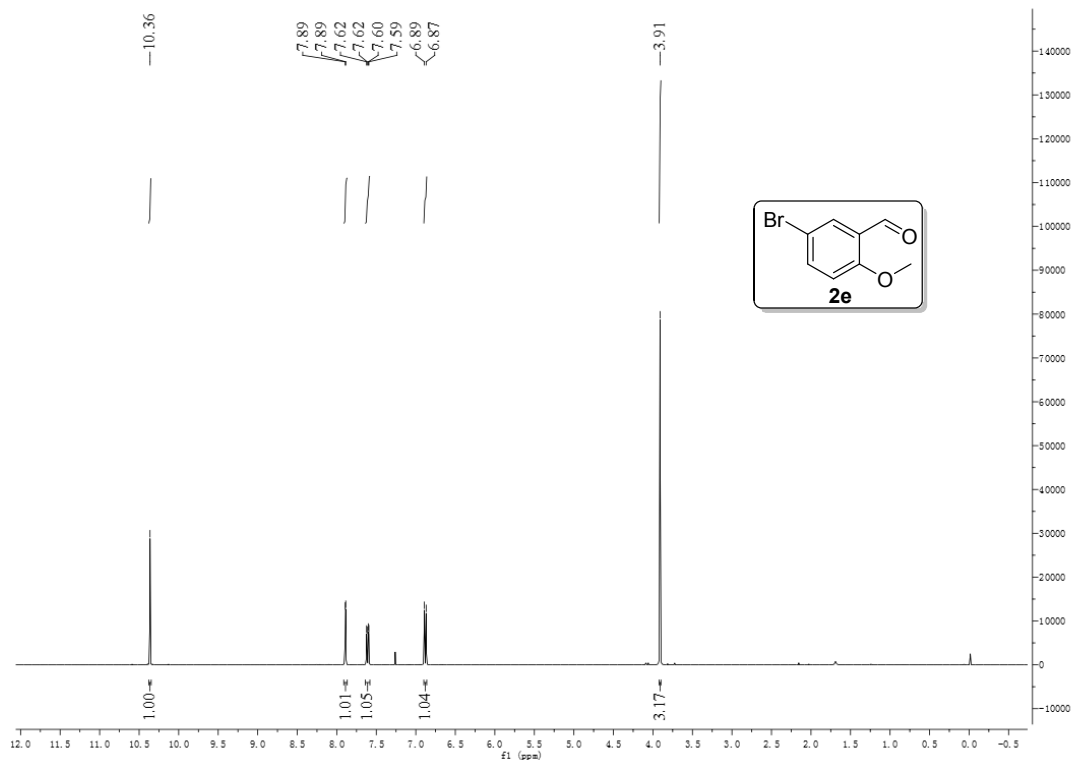

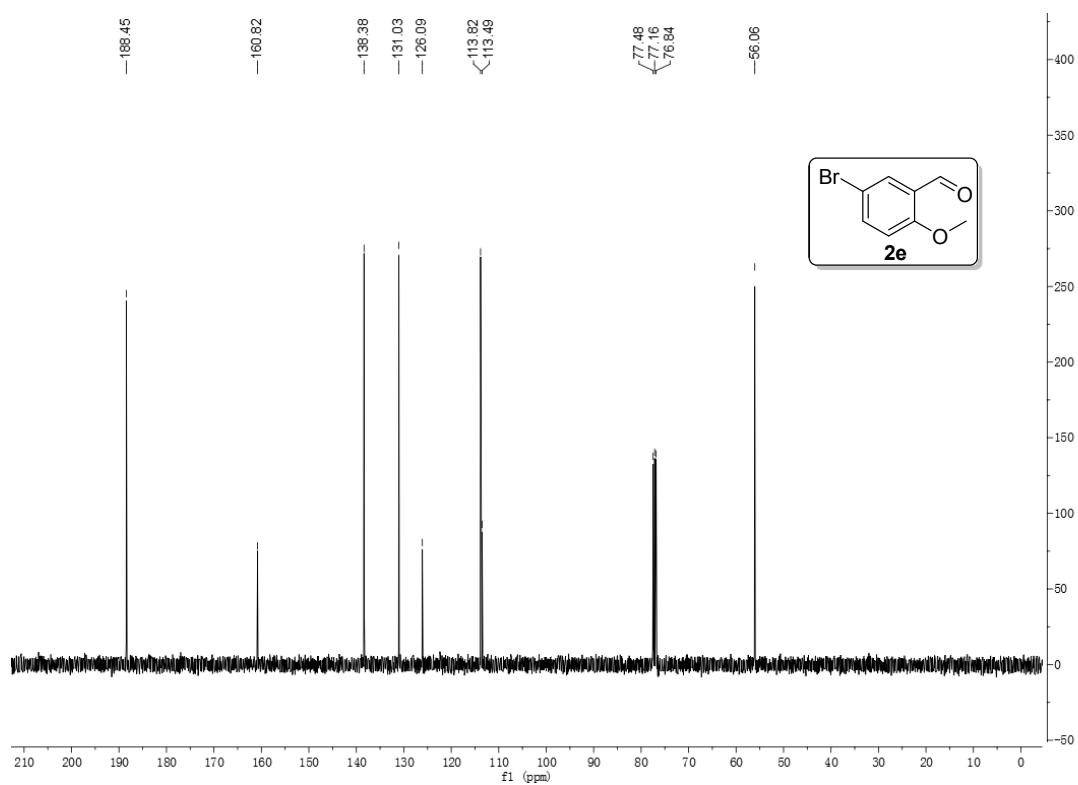

#### 4-Methylsulphonyl benzaldehyde(2f)

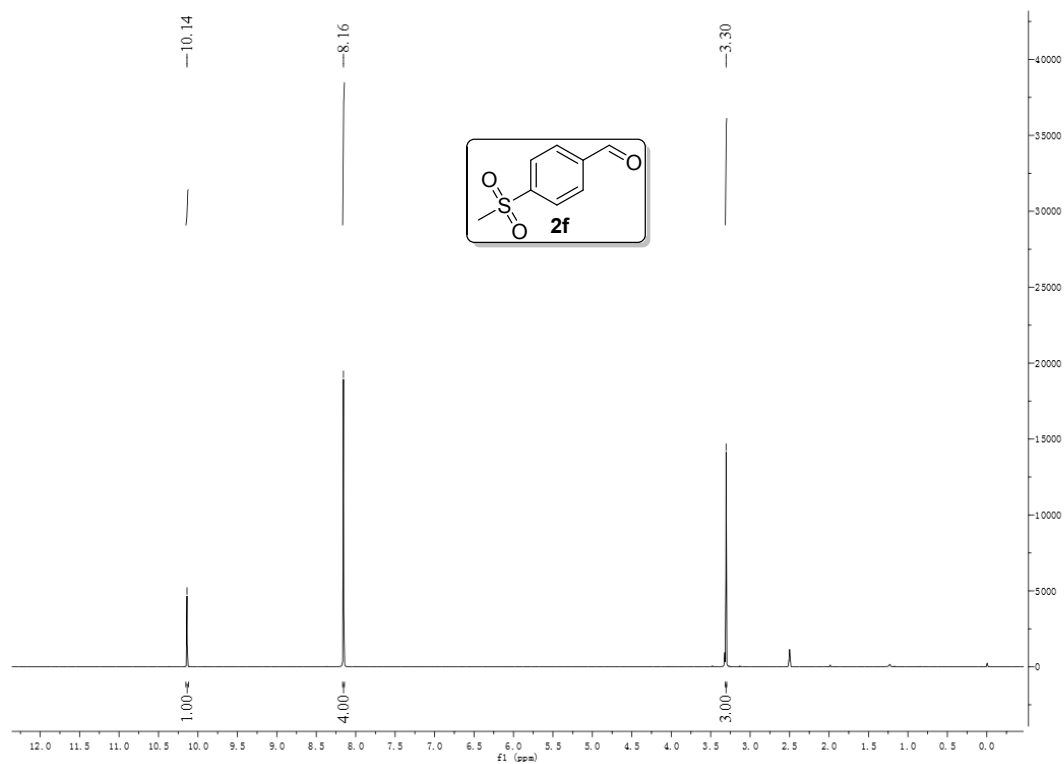

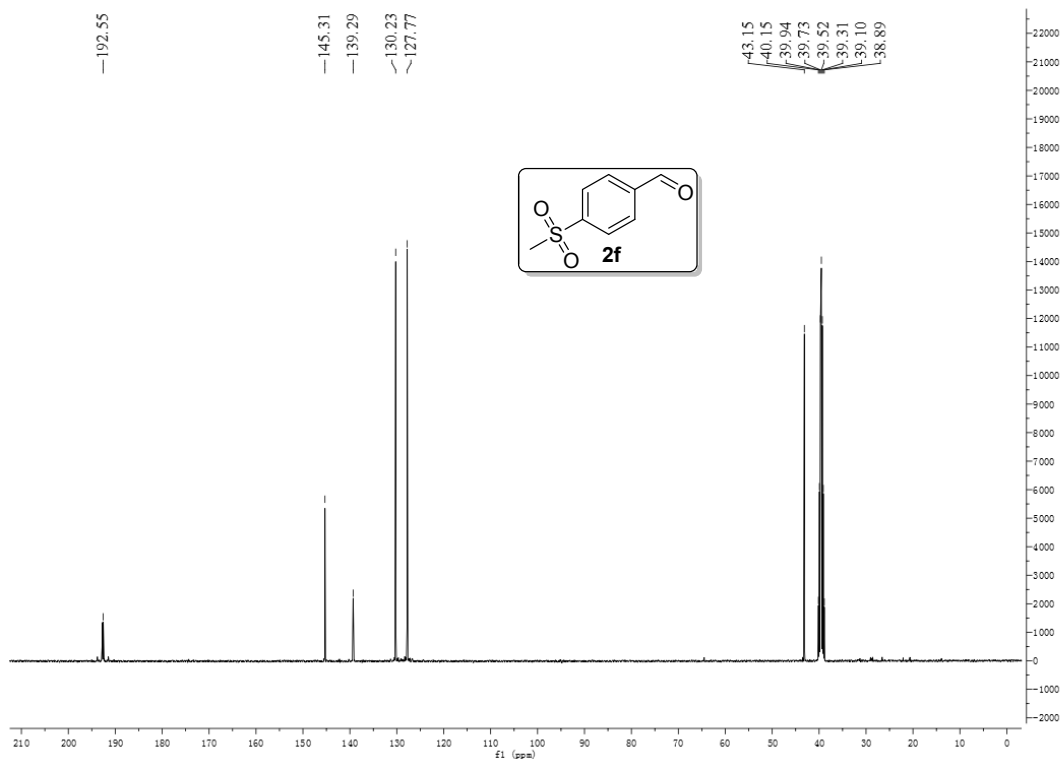

### 3-Phenoxy-benzaldehyde(2g)

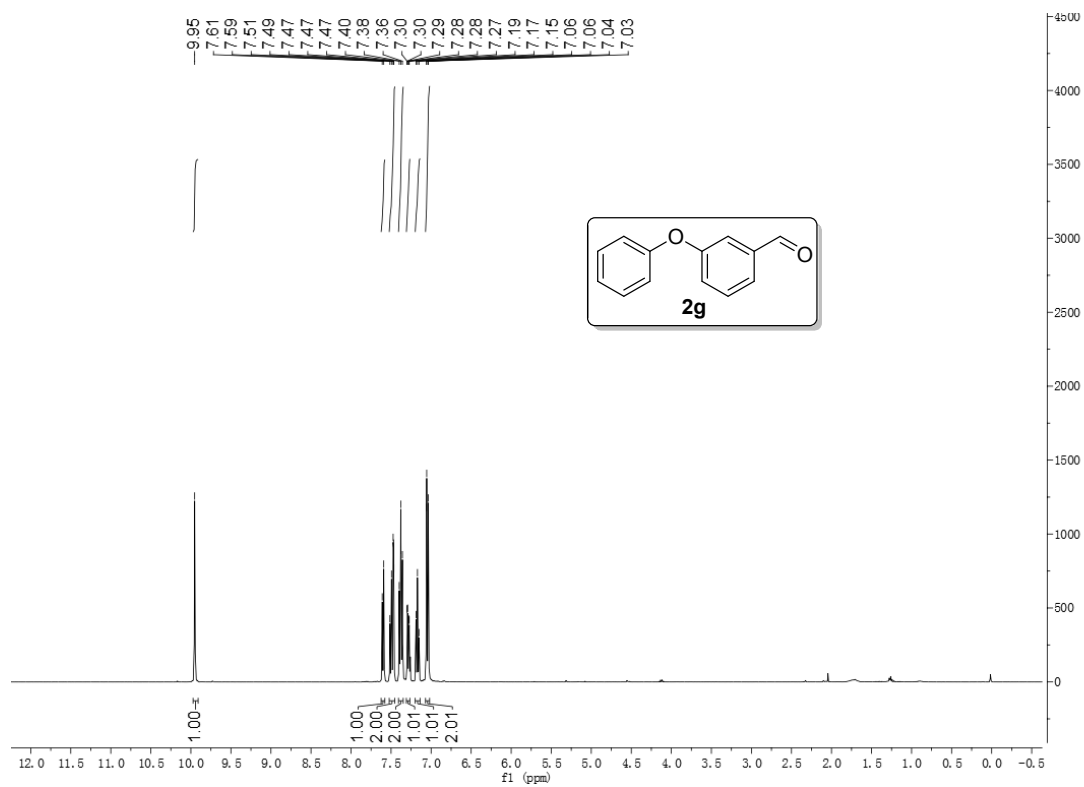

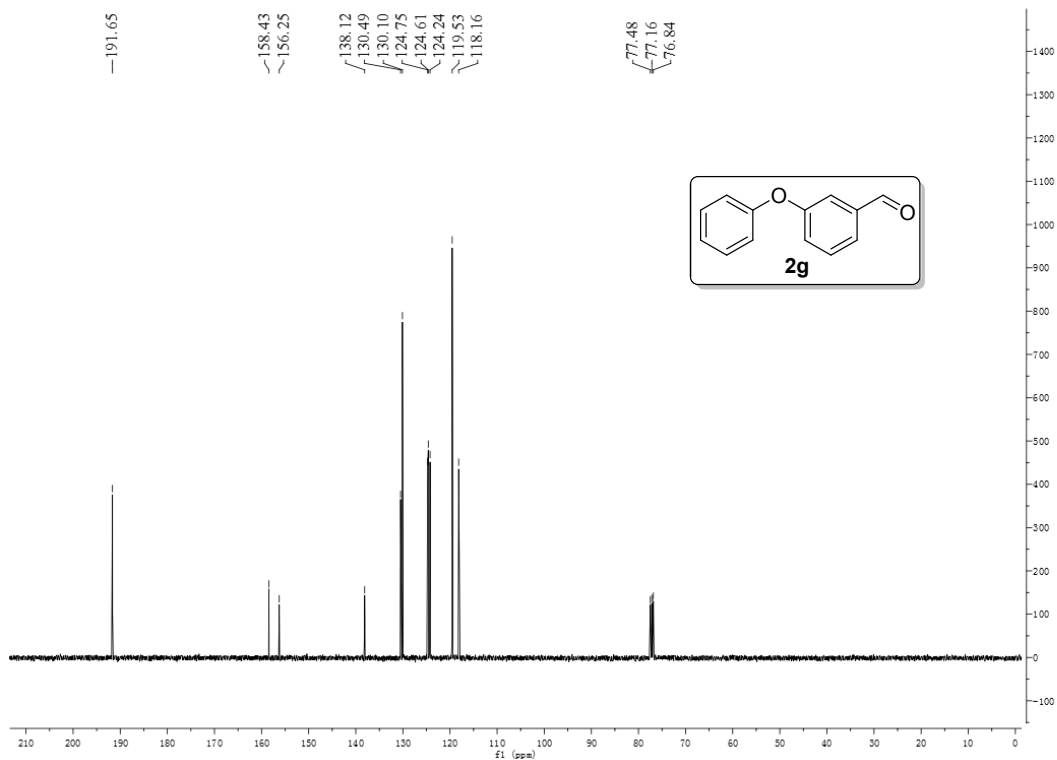

### 1-Naphthalenecarboxaldehyde(2h)

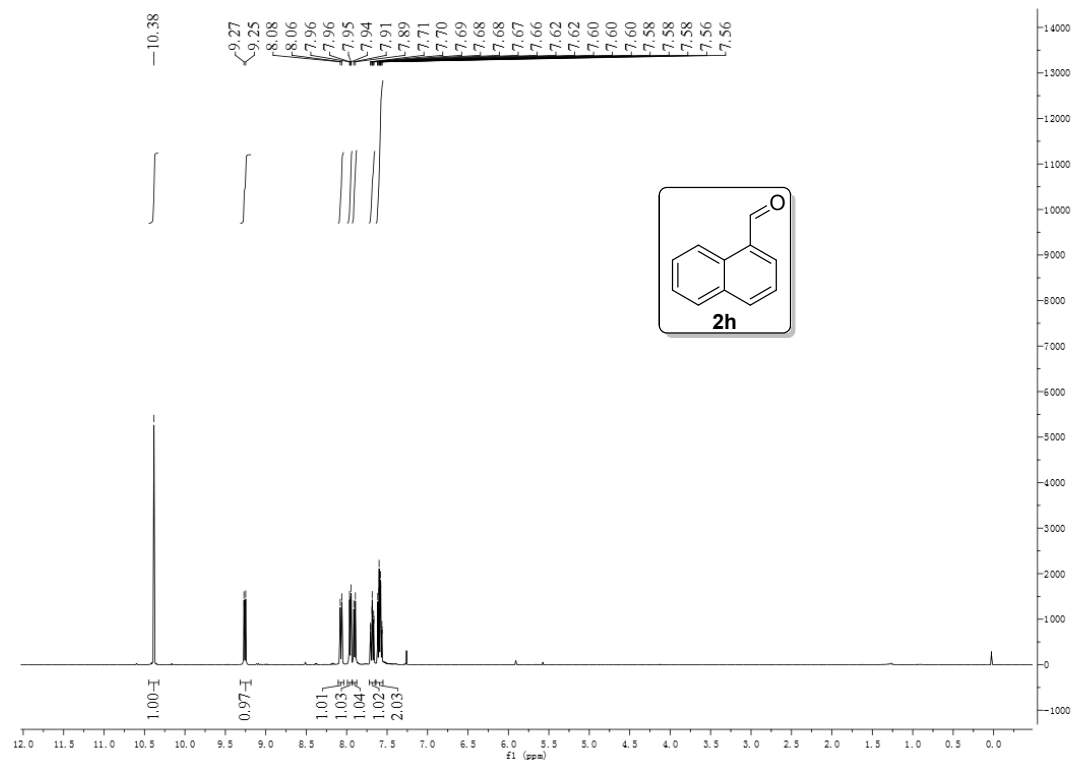

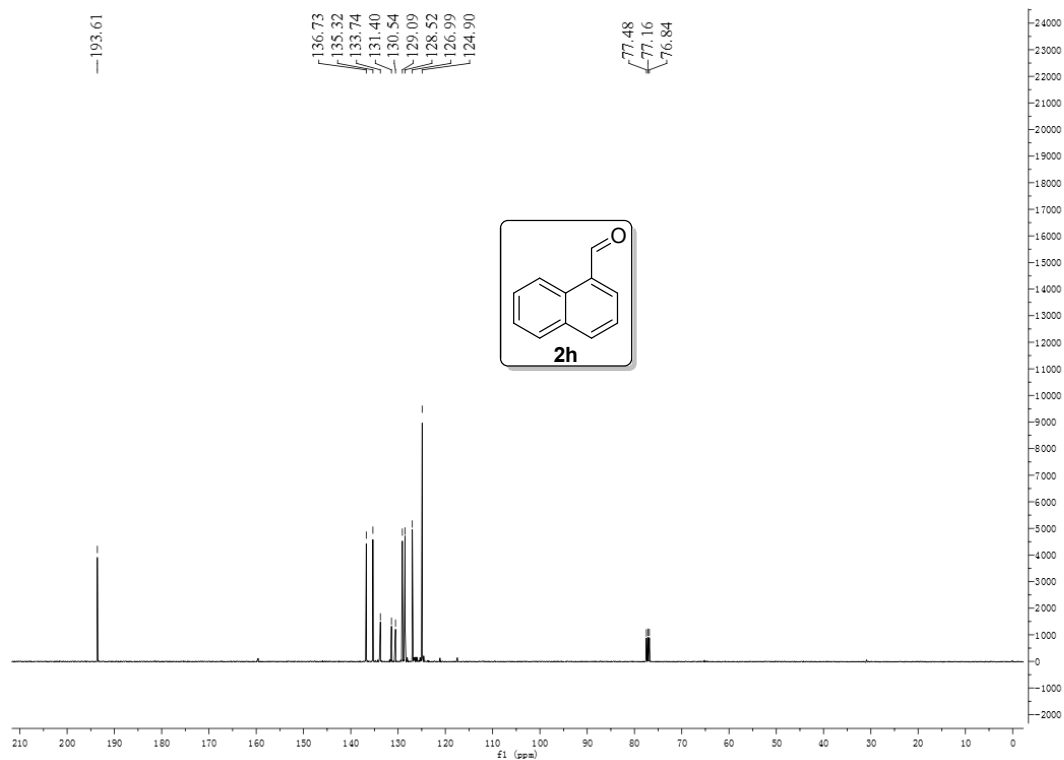

### 3-Phenyl-2-propenal(2i)

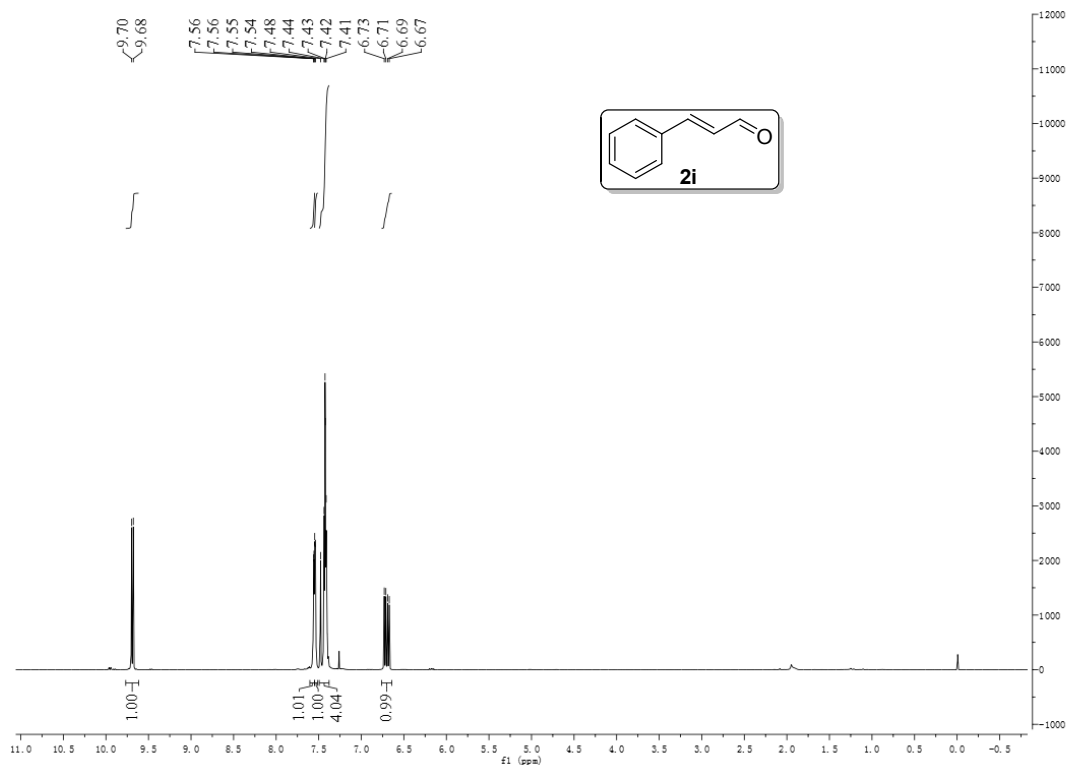

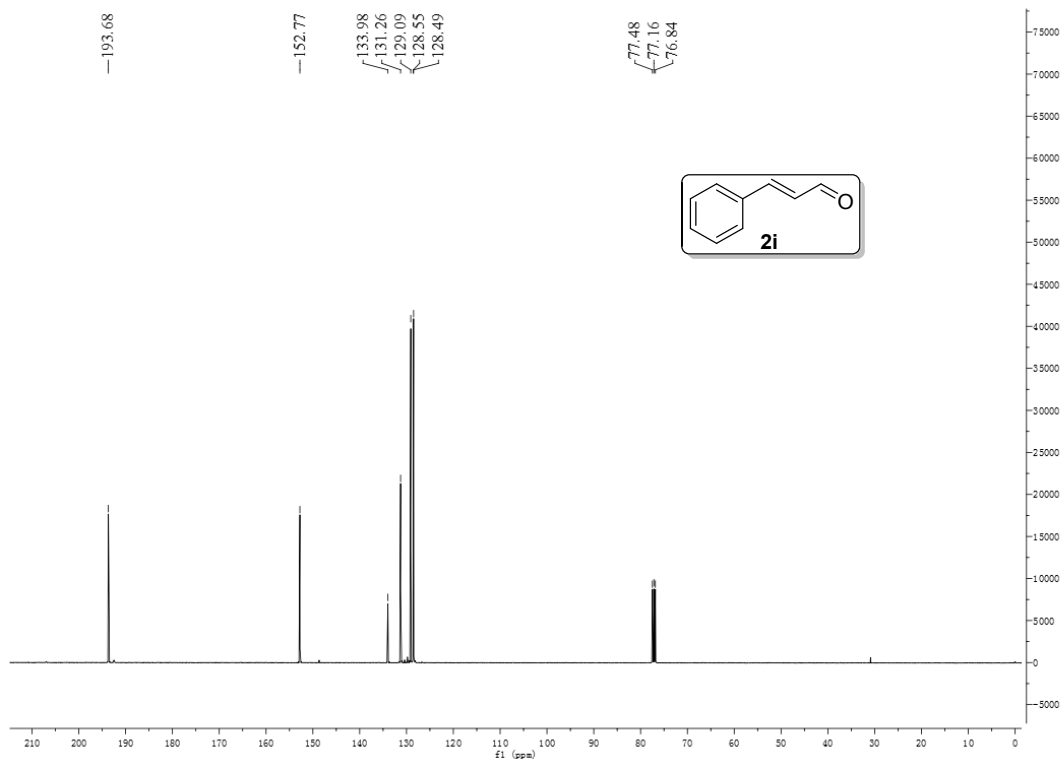

### 2-Thiophenecarboxaldehyde(2j)

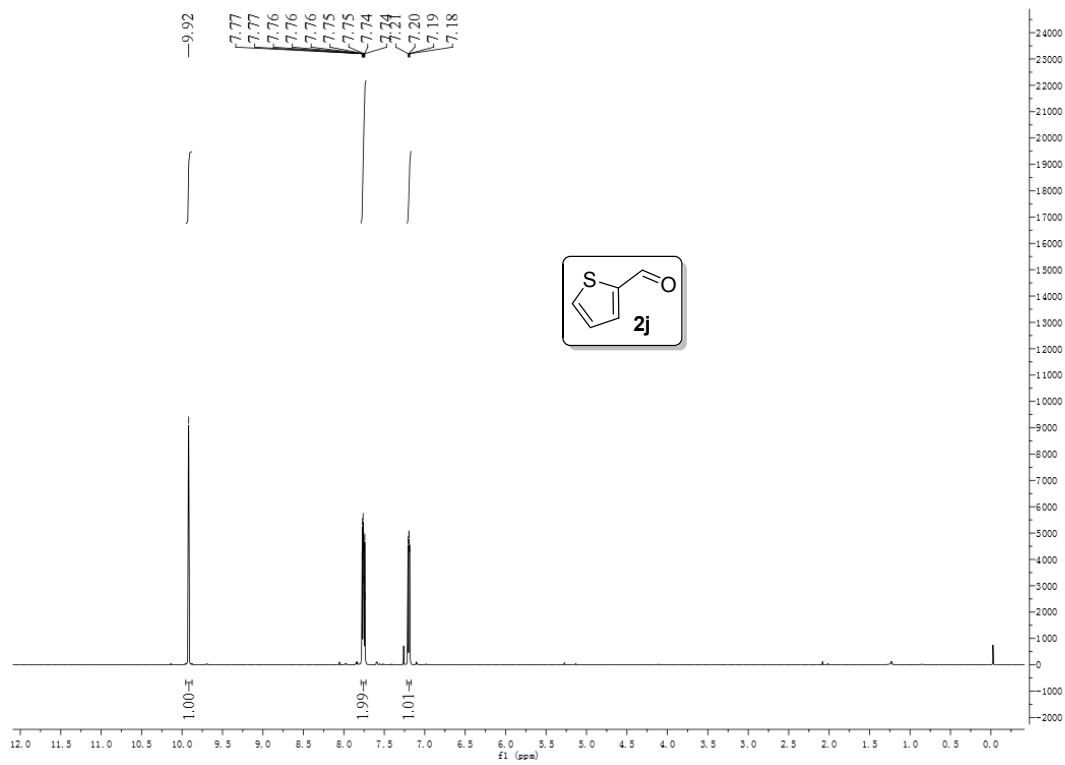



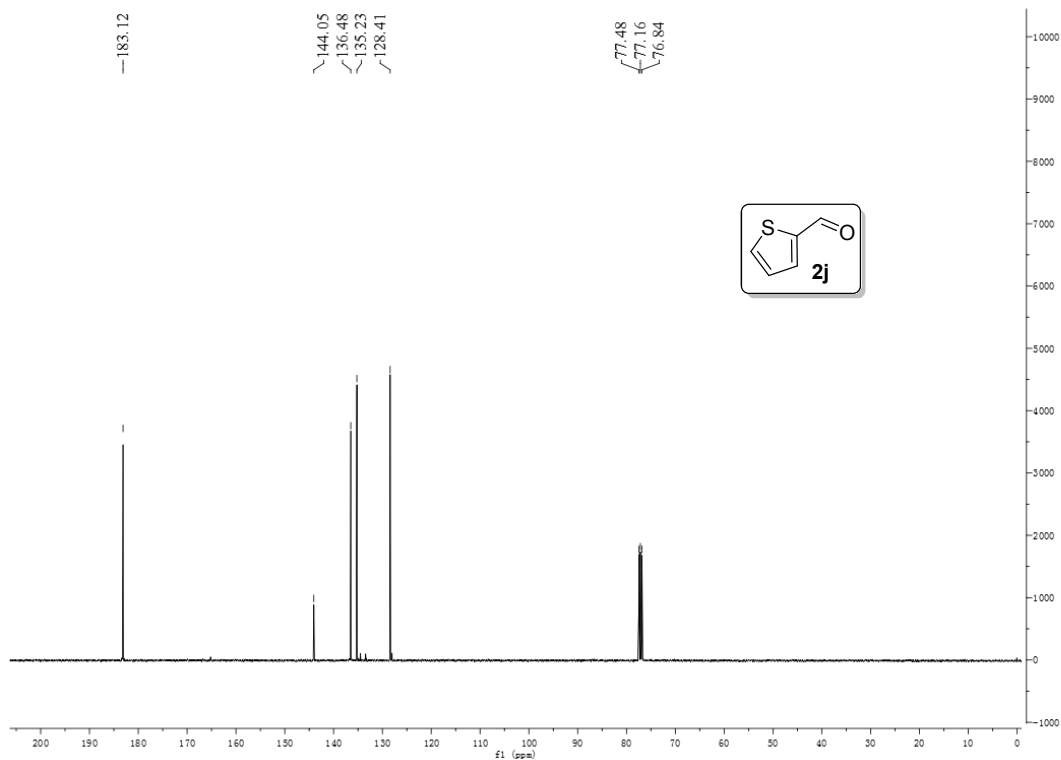

### 2-Furancarboxaldehyde(2k)

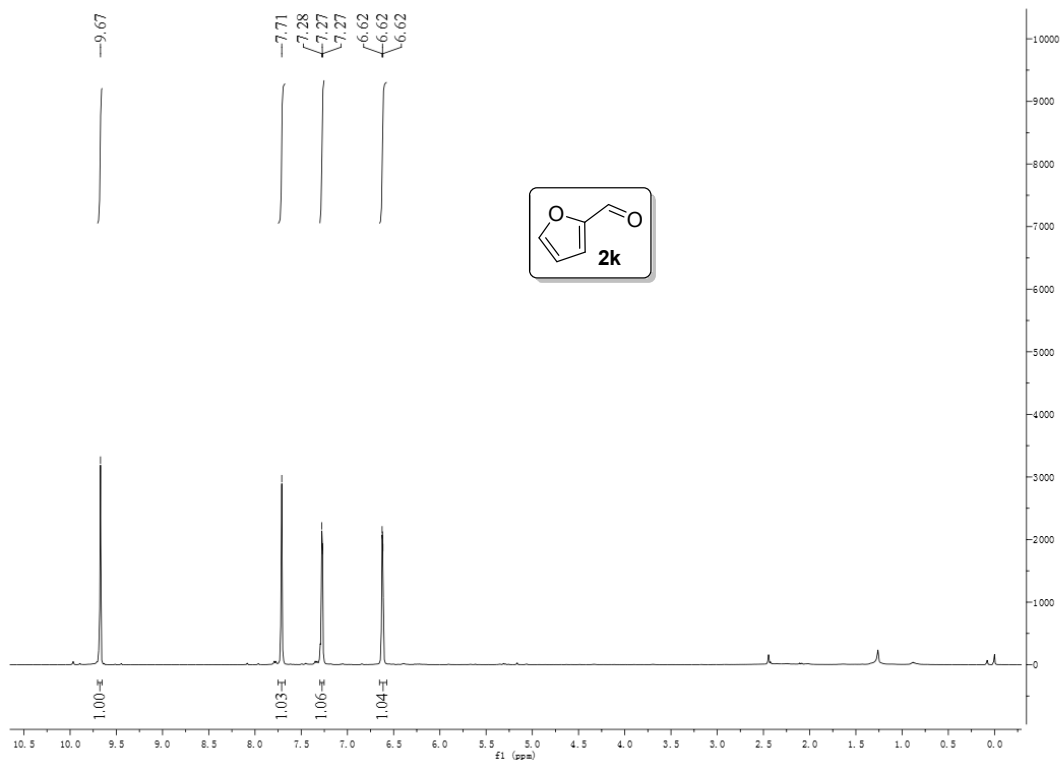

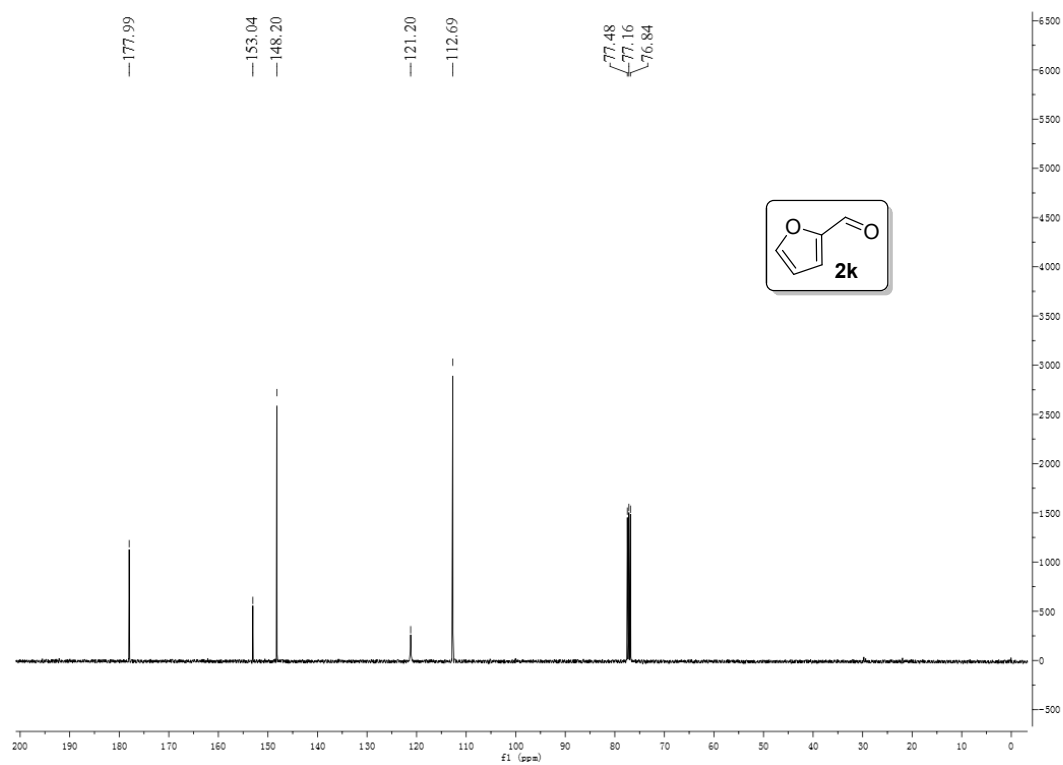

4-(Methylthio)benzaldehyde(3a)

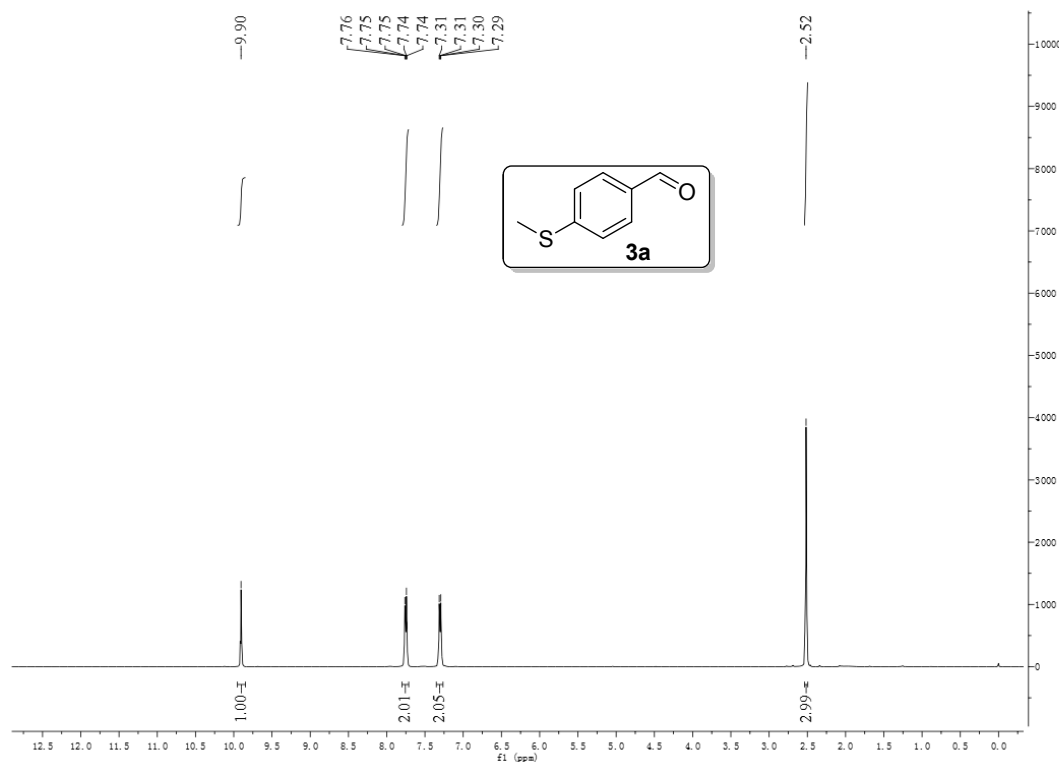

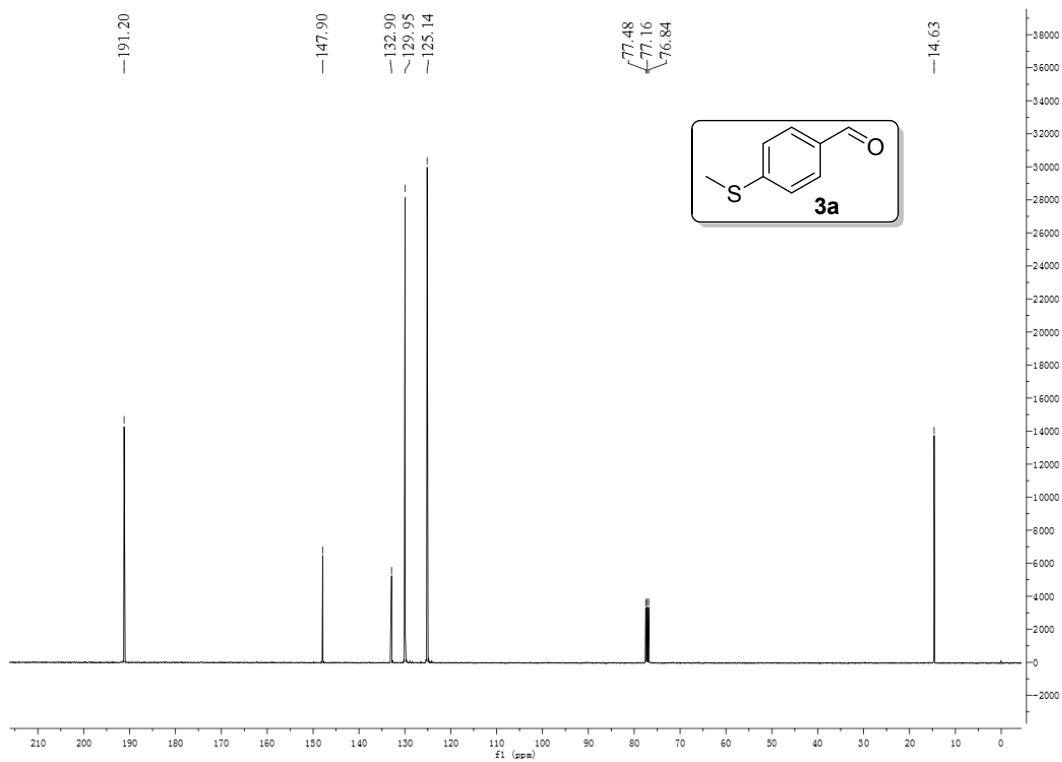

### 4-Hydroxybenzaldehyde(3b)

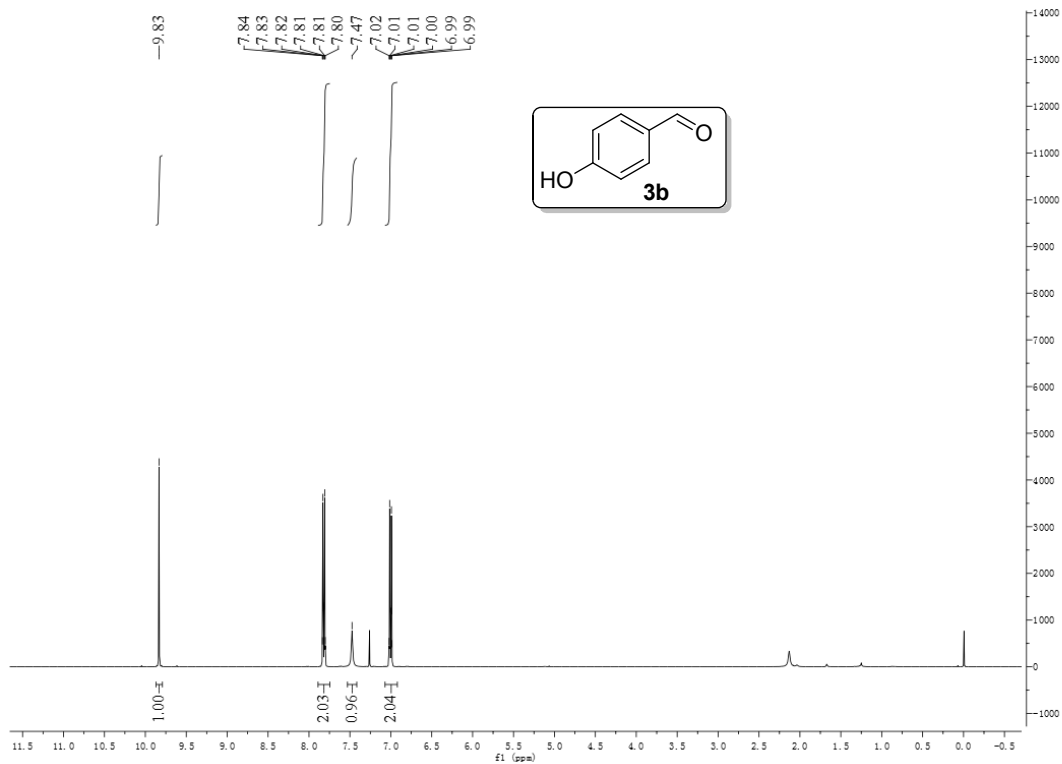

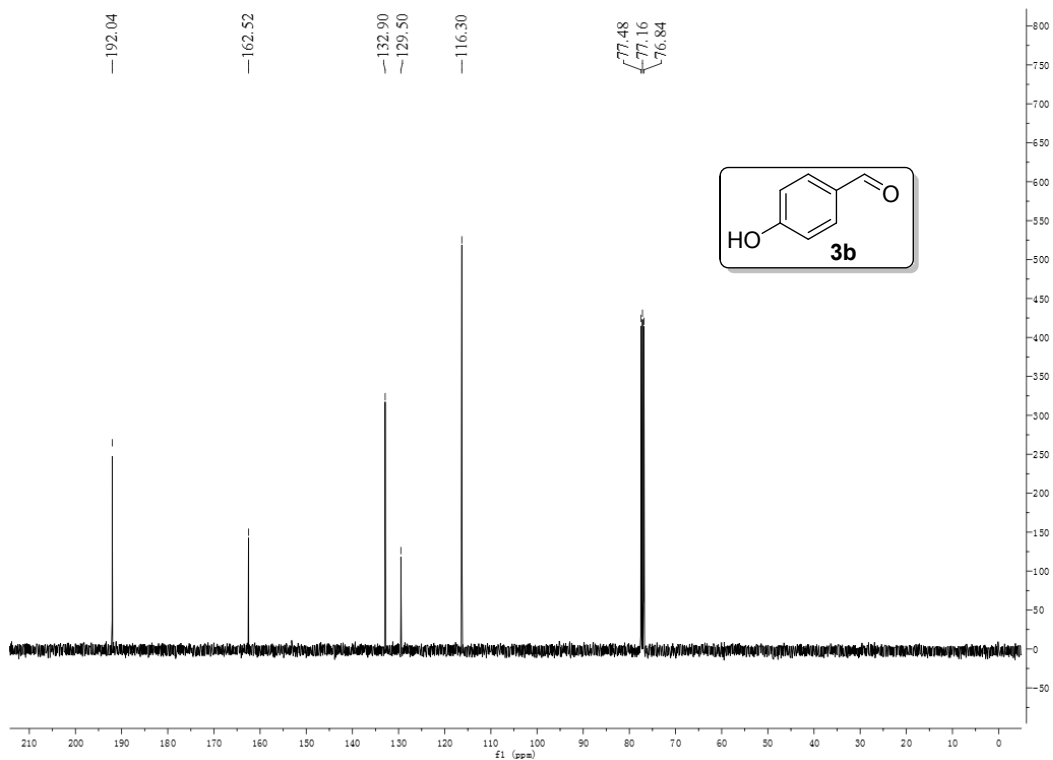

### 3-Hydroxybenzaldehyde(3c)

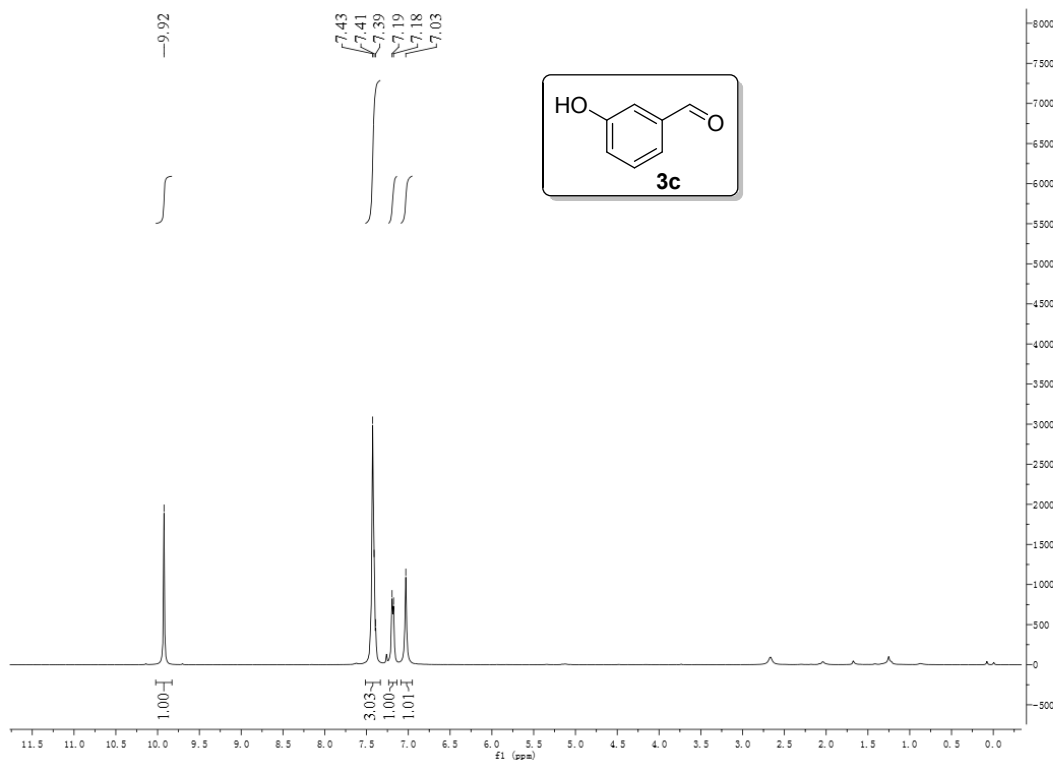

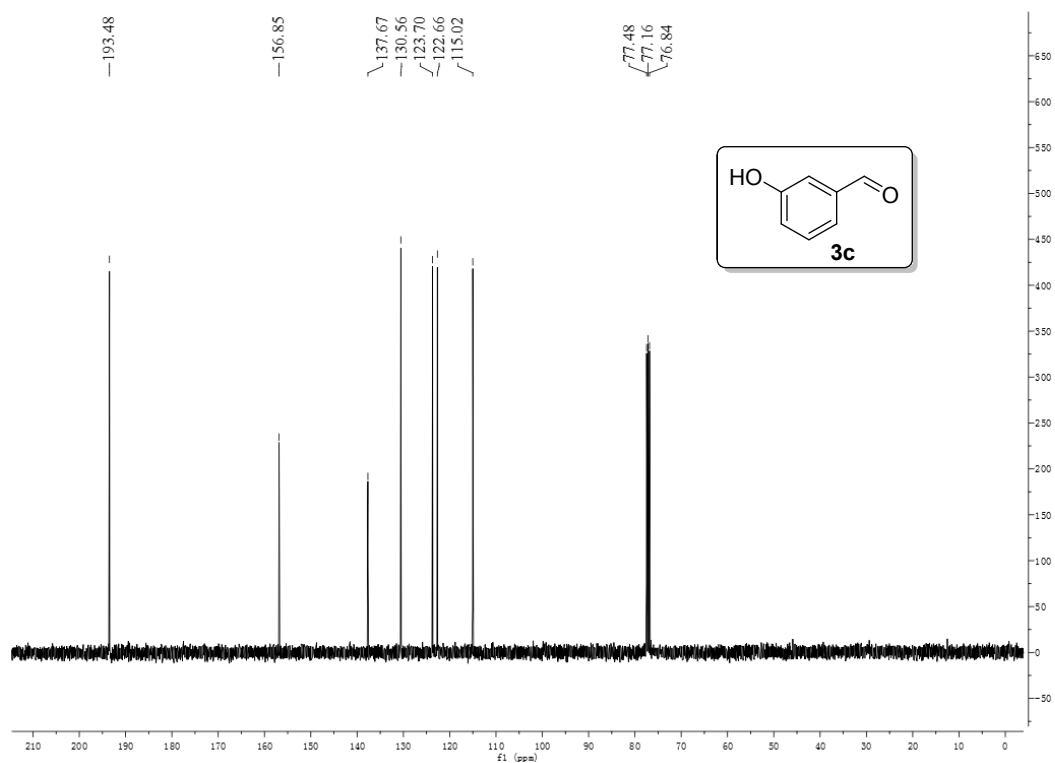

#### 4-Hydroxy-3-methoxybenzaldehyde(**3d**)

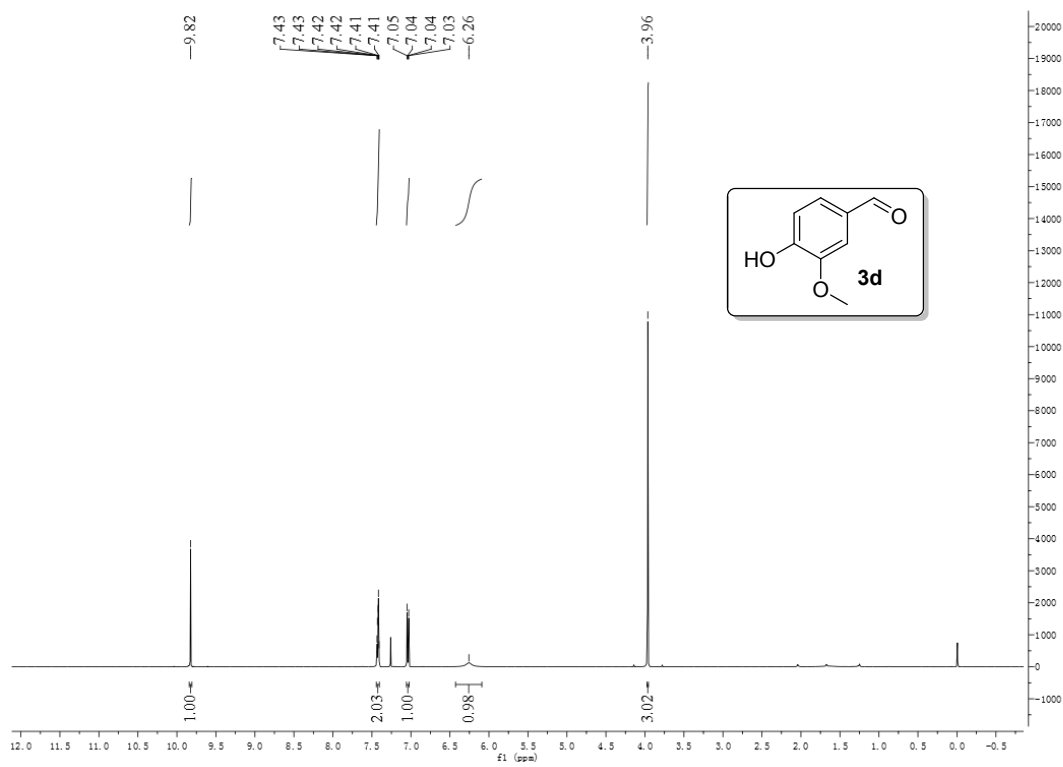

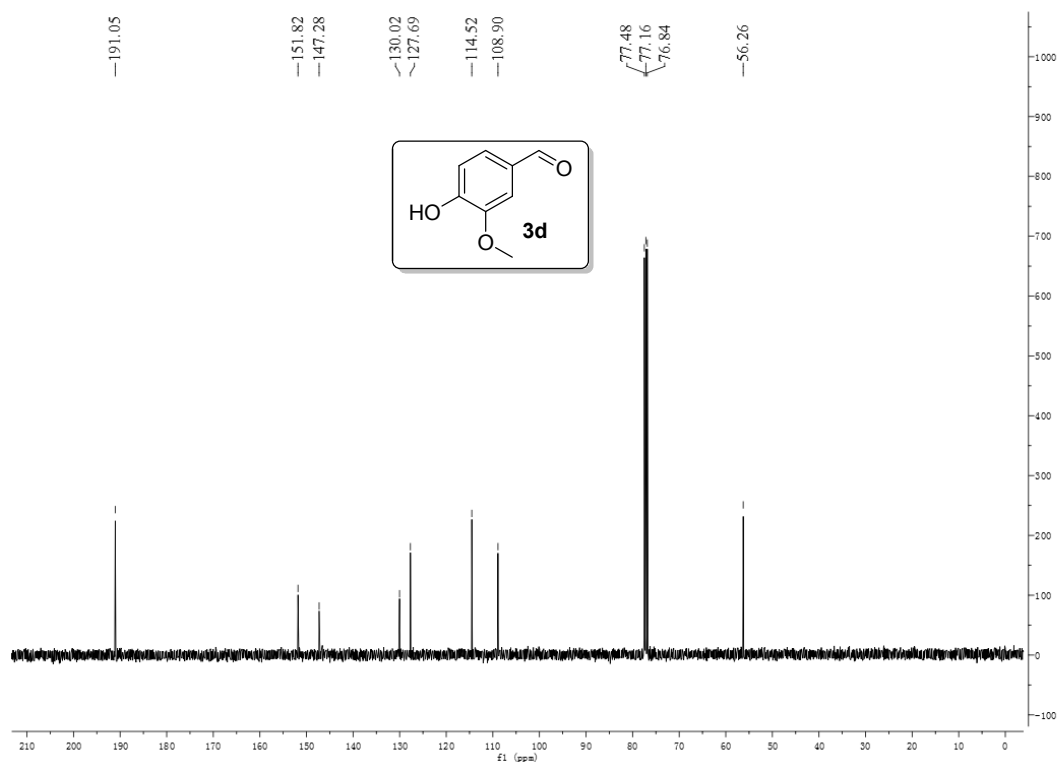

### 2-Aminobenzaldehyde(3e)

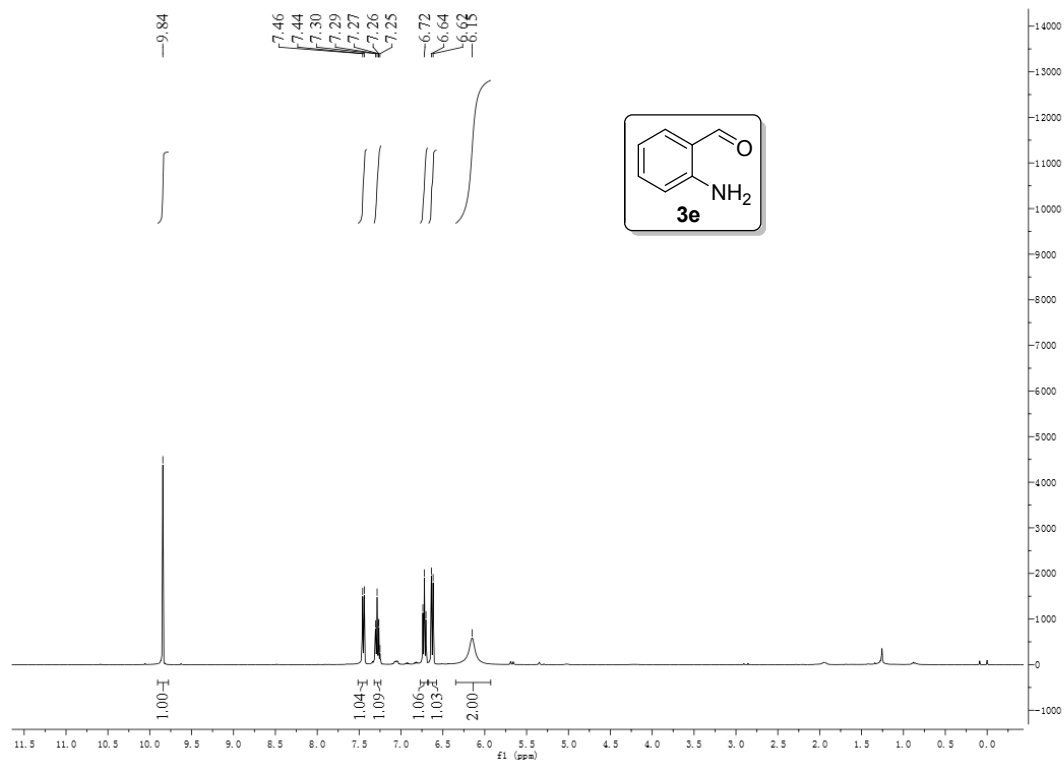

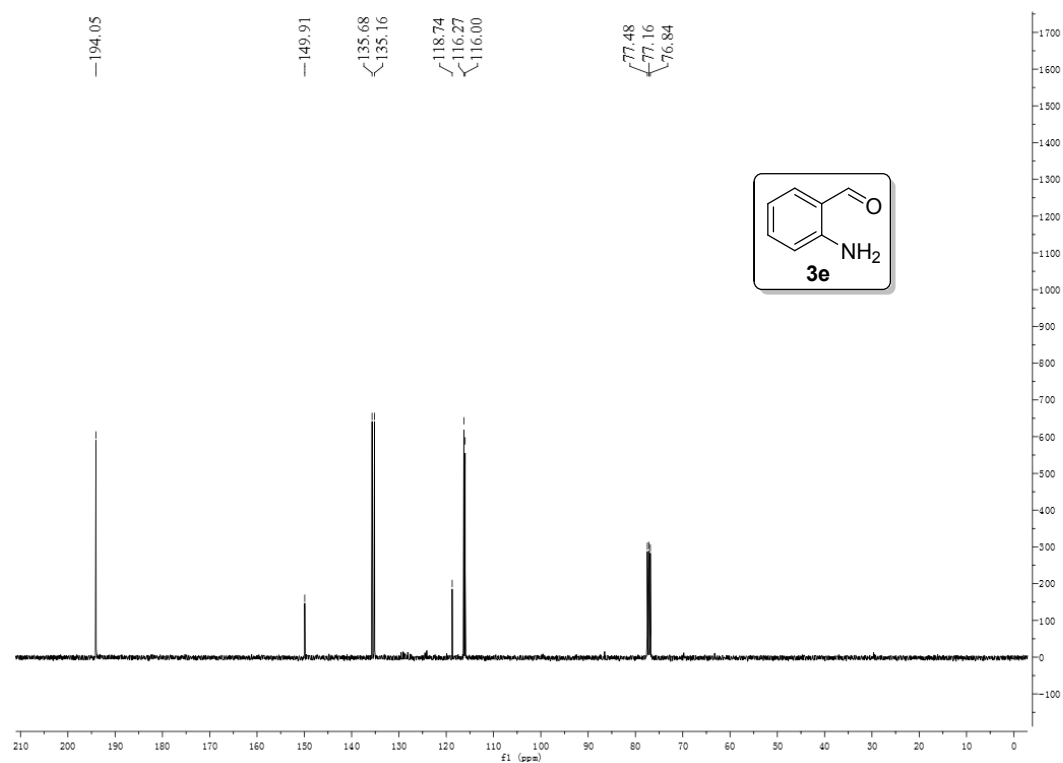

### 3,7-Dimethyl-2,6-octadienal (**3f**)

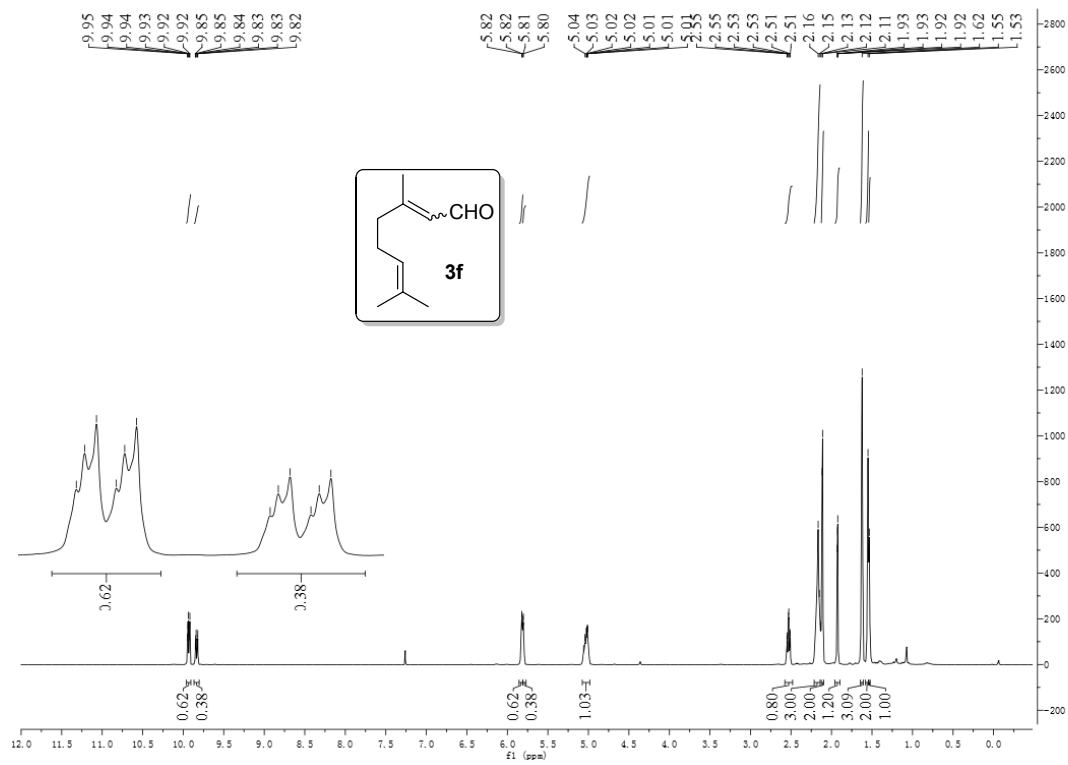

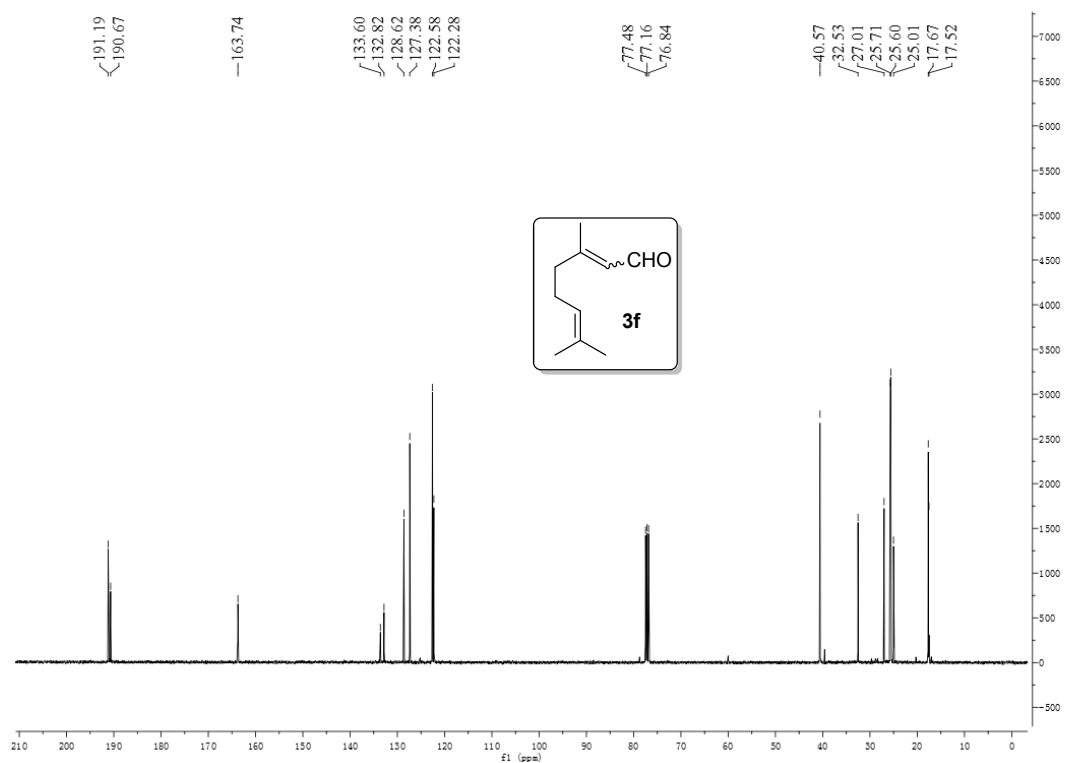

### 4'-Bromoacetophenone(3g)

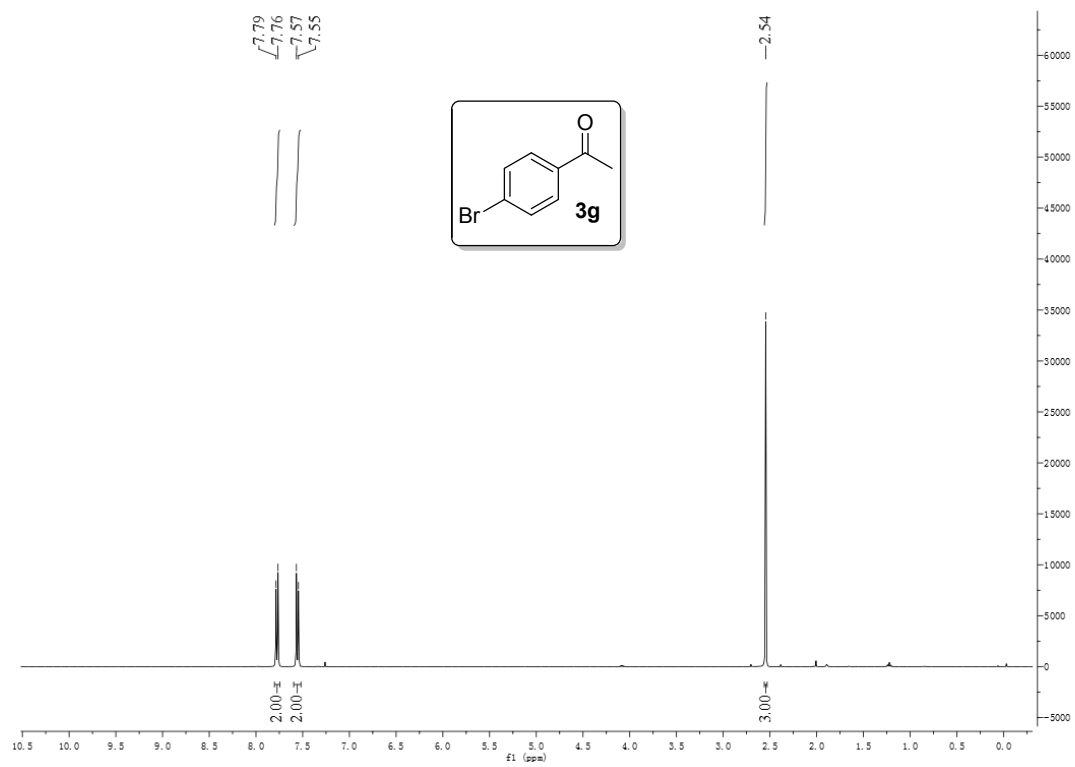



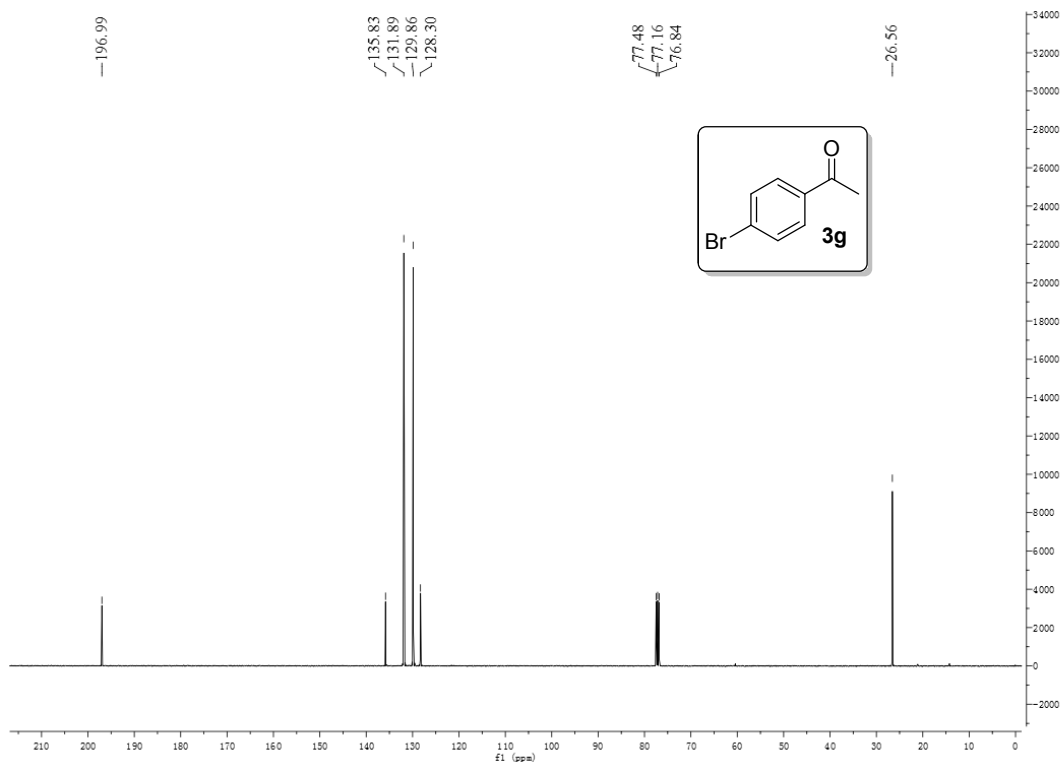

### Diphenylmethanone(3h)

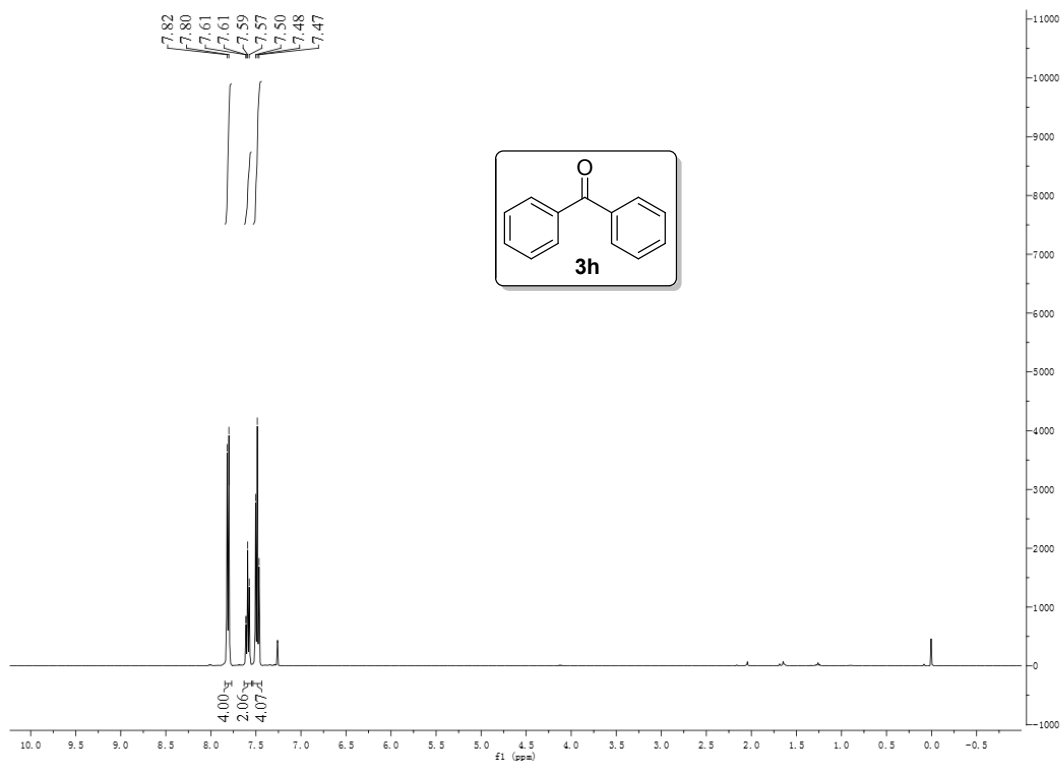

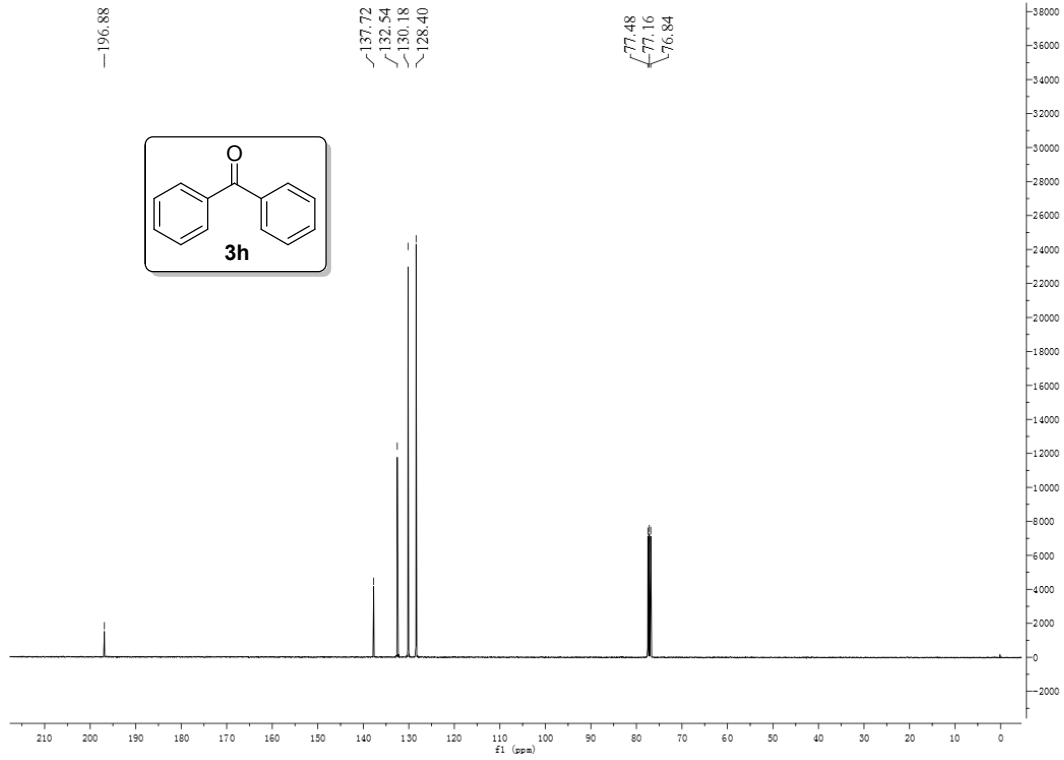

**N-Benzylideneaniline (4a)**

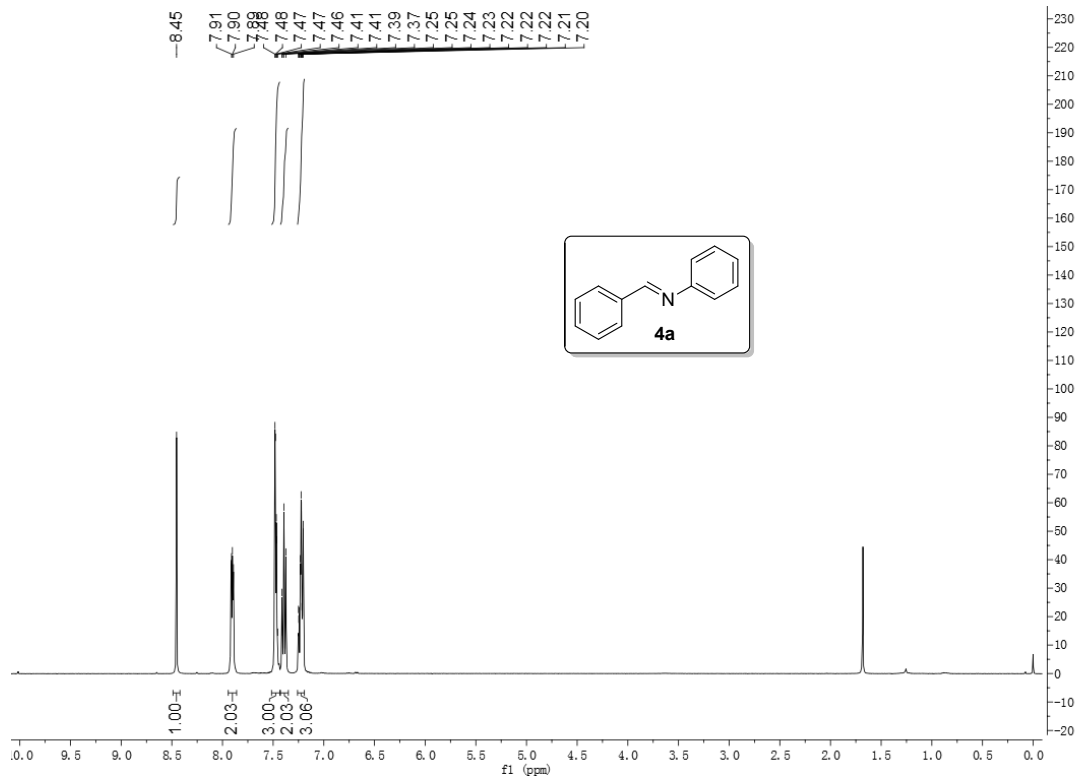

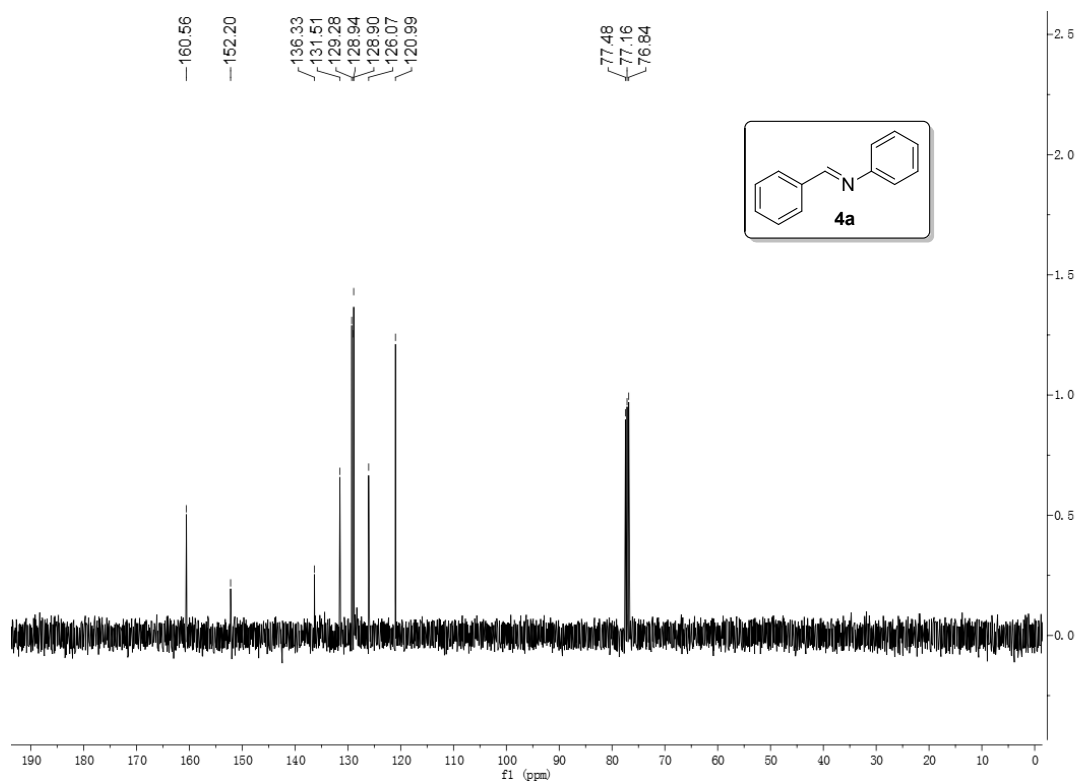

***N*-(4-methoxybenzylidene)aniline(4b)**

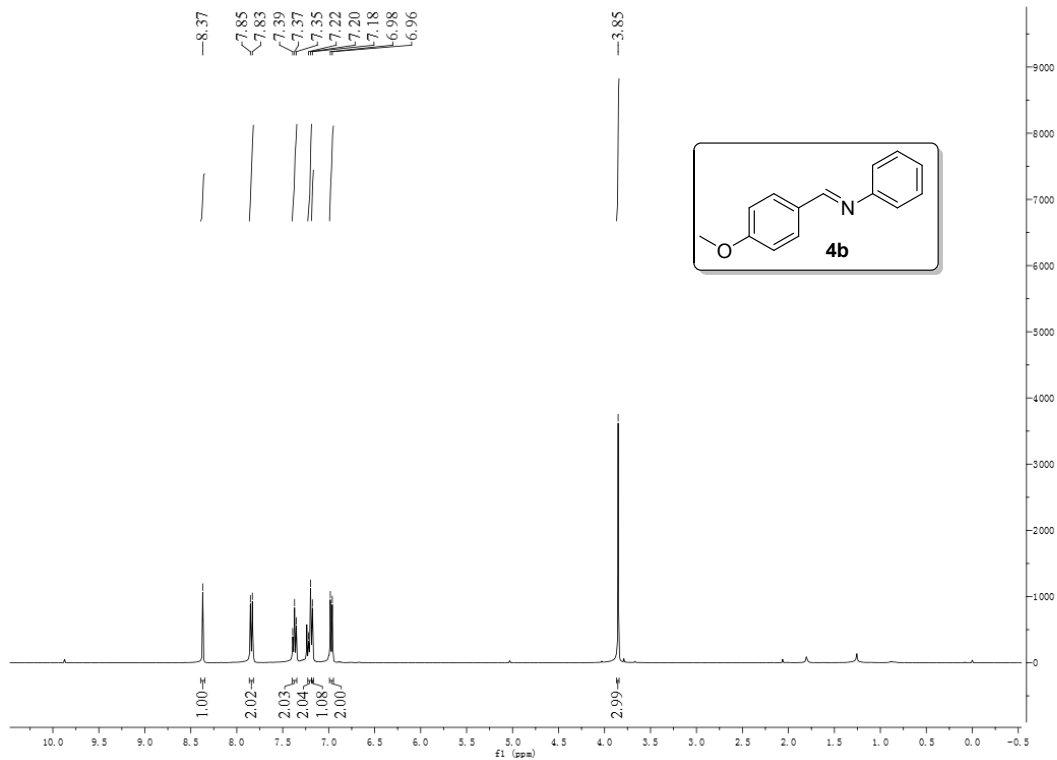

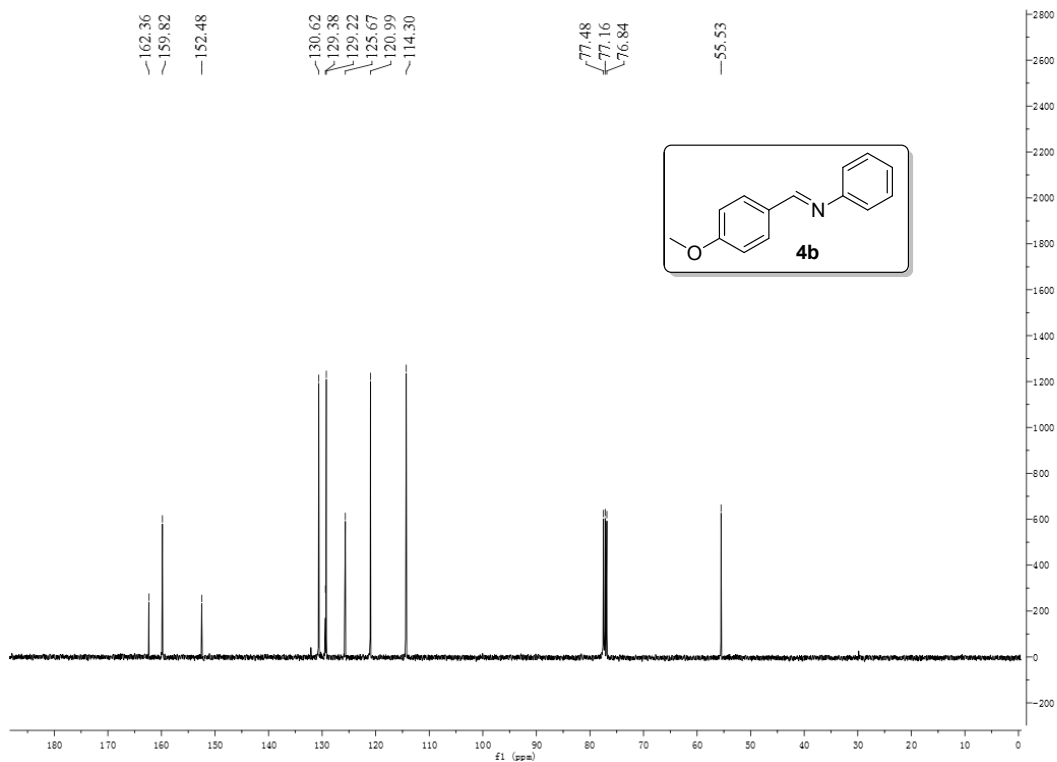

***N*-(naphthalen-1-ylmethylene)aniline(4c)**

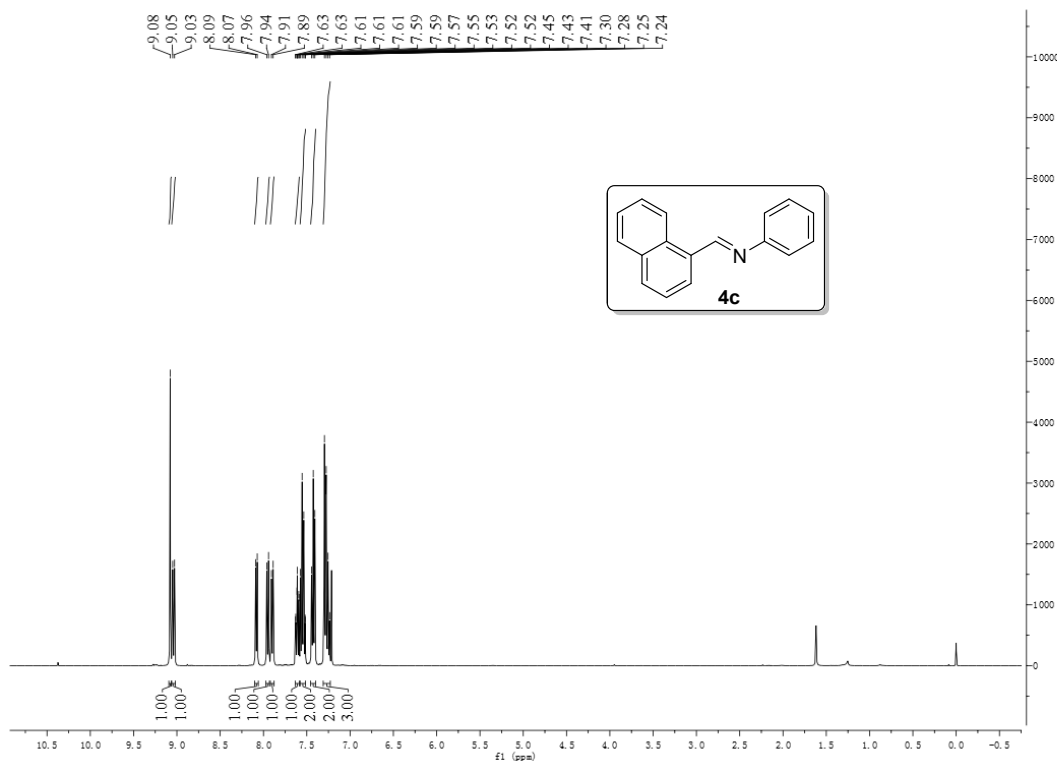

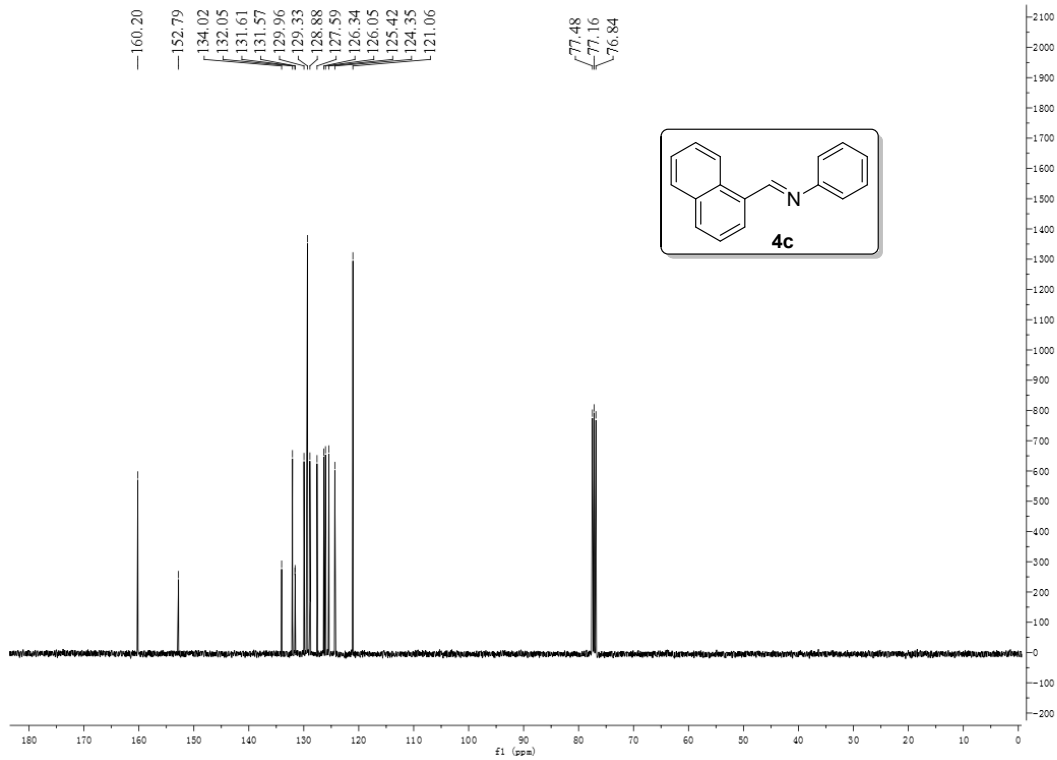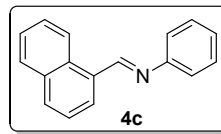

***N*-(Thiophen-2-ylmethylene)aniline(4d)**

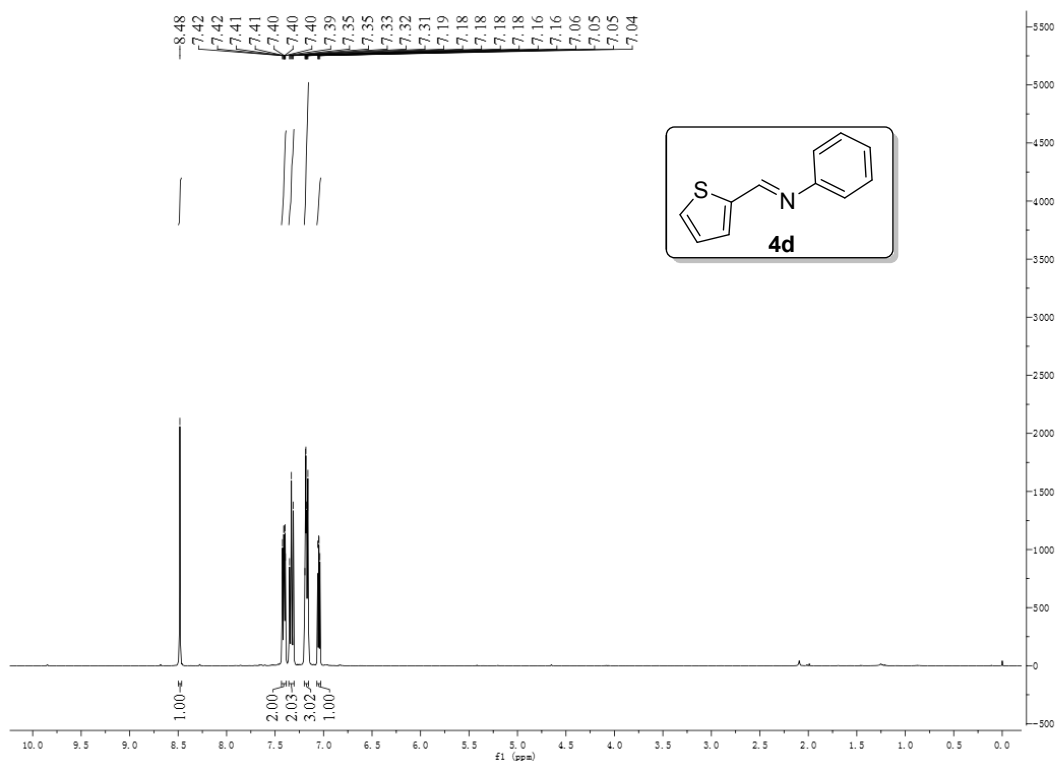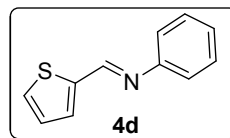

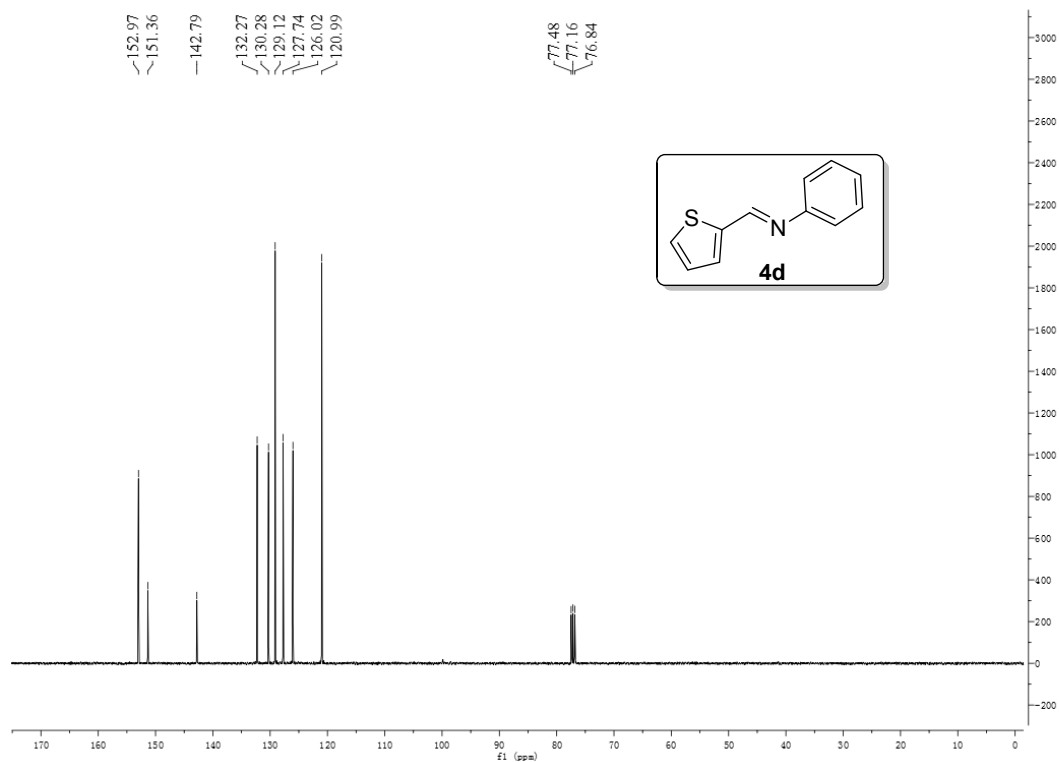

***N*-benzylidenecyclohexanamine(4e)**

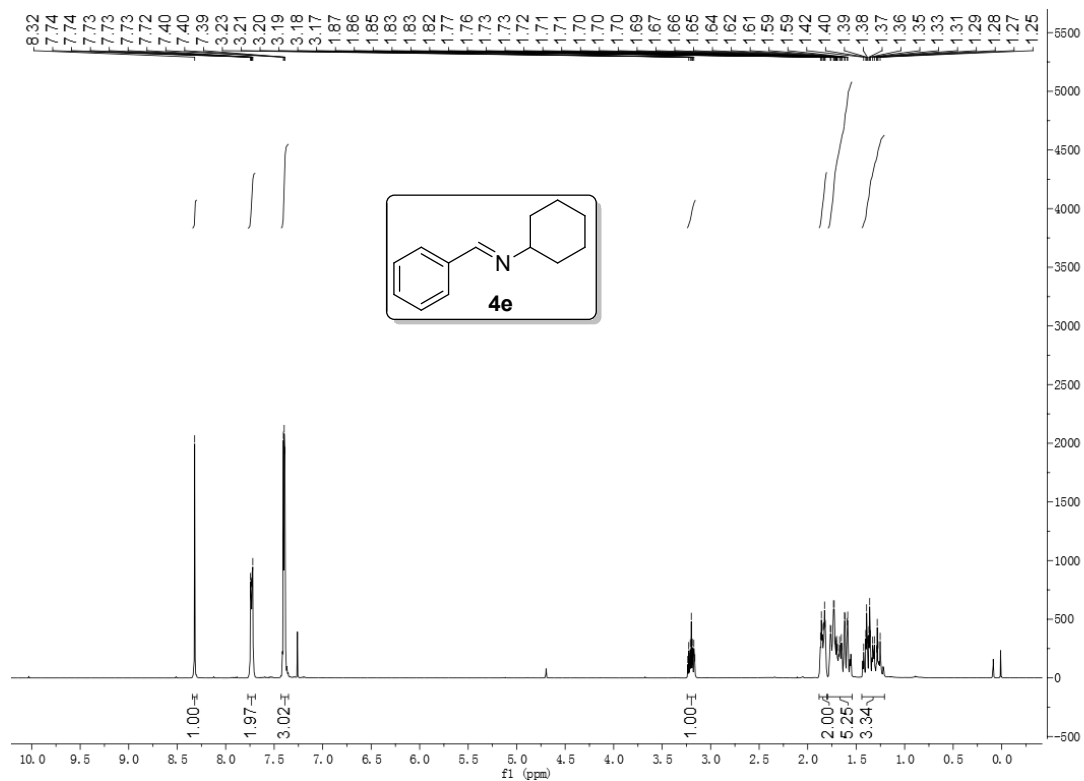

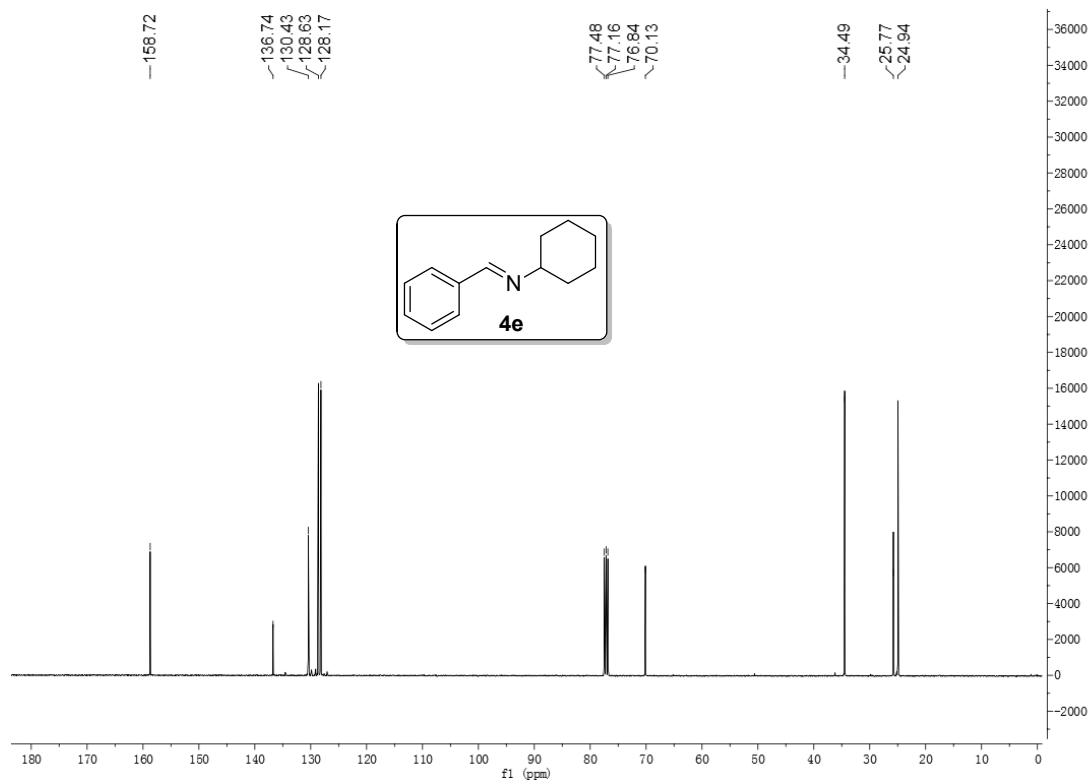

**N-benzylidenehexan-1-amine (4f)**

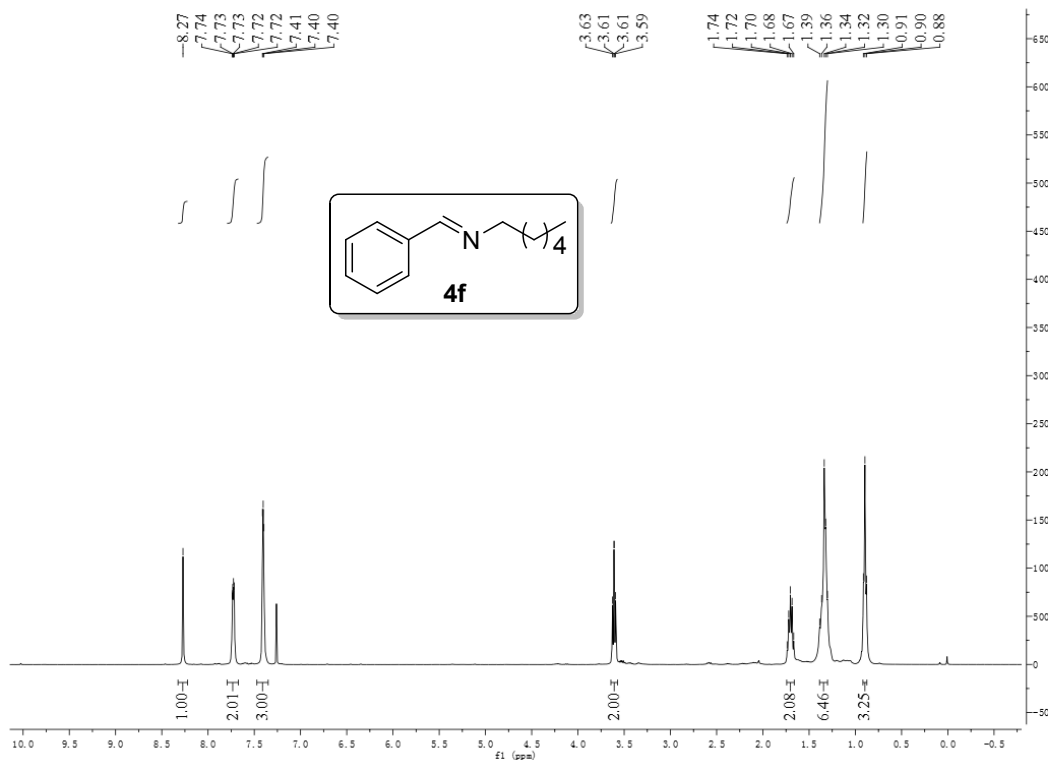

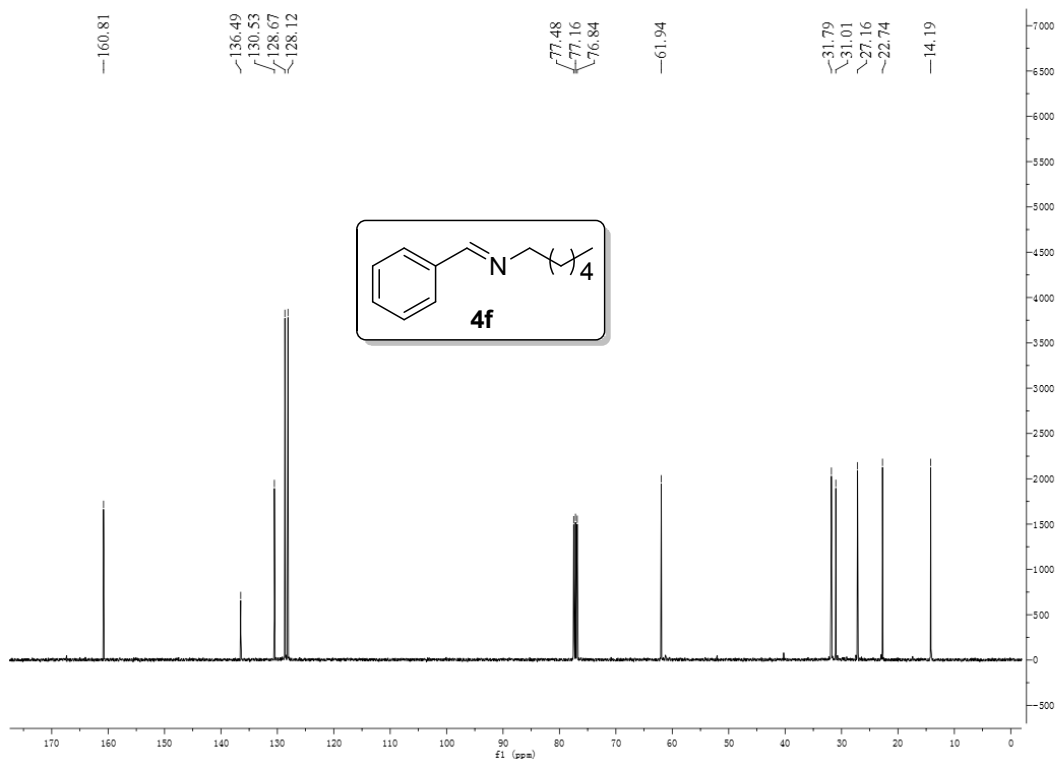

***N*-benzylidene-2-phenylethanamine(4g)**

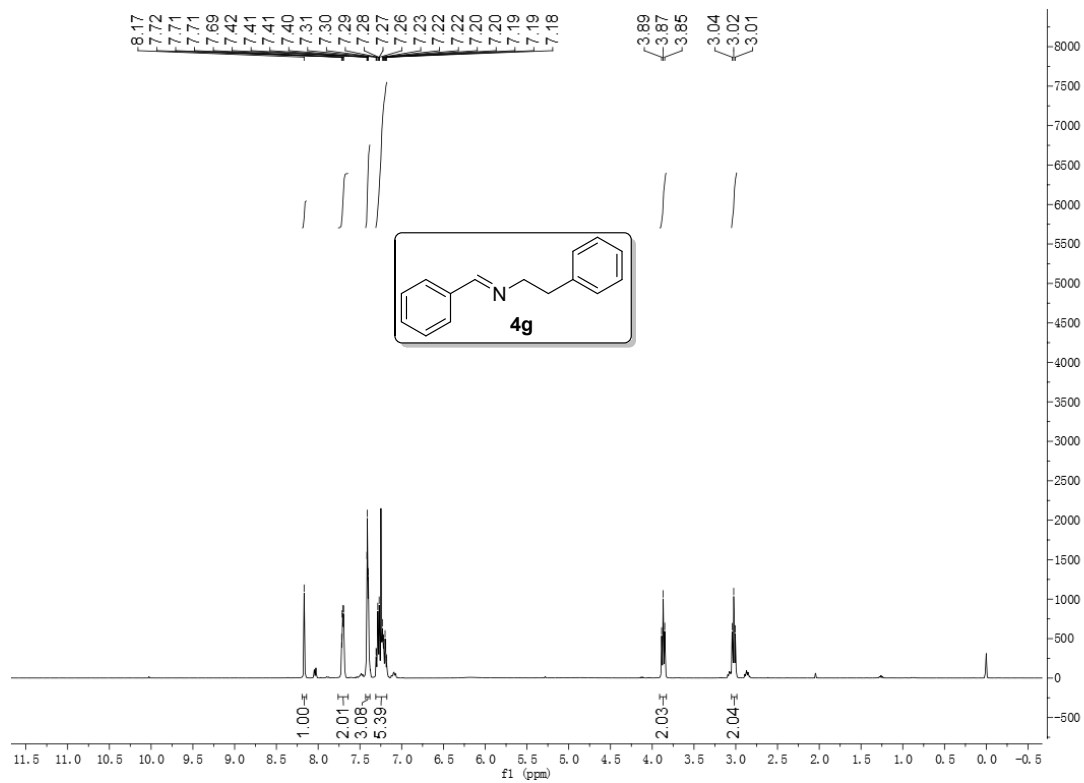



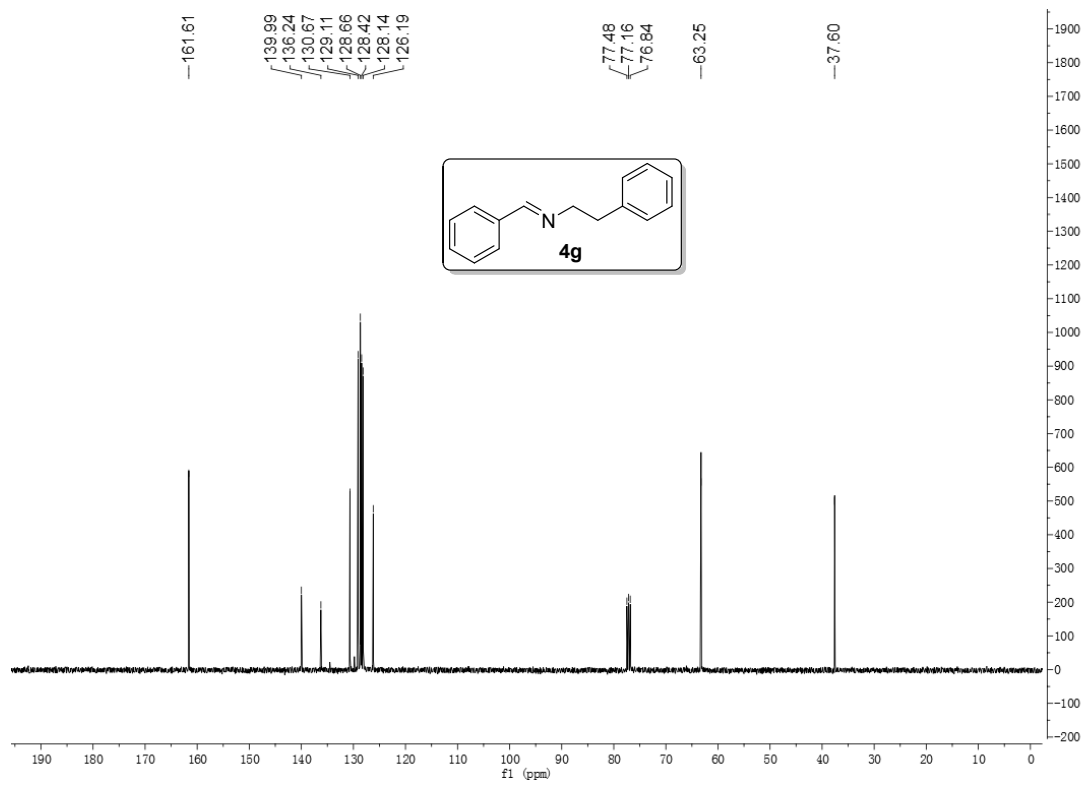

Supplement: c4ra09851j1.pdf [file c4ra09851j1.pdf]
